# Supplementary material
Source: Research Square preprint supplement (doi:10.21203/rs.3.rs-9118779/v1)
Supplement: Supplementary file 1 [file 1941e6e0426e4a3b3c5d4fa6.xlsx]

## Sheet: degdata (11)
Gene	FDR	Log2FC	Tumoroid coverage	Primary LGG coverage	Tumoroid mean	Primary LGG mean	P-value
FRMD3	0	-2.50332	0.206325	0.445683	0.233318	0.738151	0
SERPINI2	0	-5.80308	0.00936868	0.175847	0.0084782	0.257423	0
SCN7A	0	-2.68622	0.104482	0.288446	0.107573	0.38011	0
FKBP5	0	-3.89374	0.387041	0.920341	0.528759	4.23576	0
RNU6-439P	0	-4.55449	0.0405659	0.300813	0.0473134	0.619579	0
ASTN2	0	-2.01474	0.773582	0.927172	2.16101	4.80158	0
JADE1	0	-1.91866	0.179004	0.33175	0.18296	0.382198	0
ADAMTS5	0	-4.45303	0.0160029	0.162616	0.0145068	0.173624	0
LIFR-AS1	0	-3.50251	0.108786	0.458325	0.103602	0.639236	0
WDR49	0	-5.02331	0.0437047	0.325861	0.0471642	0.832853	0
PRKAG2	0	-1.62245	0.333777	0.470064	0.382139	0.649472	0
MBOAT2	0	-1.43008	0.547878	0.647874	0.840157	1.24535	0
VSX1	0	-3.14669	0.0934253	0.366103	0.0868494	0.426633	0
COLEC12	0	-5.04079	0.0924028	0.510581	0.098208	1.8135	0
NEBL	0	-1.7046	0.758412	0.915787	2.26808	4.05673	0
NECTIN3-AS1	0	-2.22738	0.139104	0.311295	0.173311	0.443658	0
PARD3B	0	-2.5325	0.1708	0.408425	0.248791	0.797526	0
ALDH1L1	0	-4.22647	0.0920461	0.56158	0.0827438	0.873784	0
MEF2C-AS1	0	-3.77233	0.082511	0.384084	0.0862539	0.653758	0
GPC5	1.10368e-303	-3.04182	0.479776	0.886067	1.26077	5.83383	2.10868e-306
TENT5A	1.2696e-299	-1.98086	0.373368	0.555063	0.609127	1.31015	2.54697e-302
PCSK2	1.27875e-298	-3.65447	0.136631	0.534529	0.159469	1.09824	2.68748e-301
DNAH7	2.21315e-297	-2.47584	0.0553561	0.135213	0.0532217	0.162941	4.86267e-300
TMEM72-AS1	5.42997e-289	-3.21903	0.140578	0.478466	0.138041	0.722679	1.24493e-291
BBS2	3.16614e-272	-2.18832	0.359815	0.621844	0.3906	0.98699	7.56148e-275
PAMR1	3.42941e-271	-4.26555	0.0842944	0.478976	0.0903387	0.949272	8.51783e-274
CA3	1.23547e-263	-2.22058	0.114707	0.262259	0.128257	0.333057	3.18663e-266
PDK4	7.41884e-259	-6.61671	0.00822732	0.308076	0.00617107	0.330304	1.98441e-261
FAT3	8.23762e-257	-2.61665	0.370372	0.70488	0.603832	2.08555	2.28211e-259
GRAMD1C	2.67716e-253	-3.95573	0.0975865	0.532841	0.102618	0.865675	7.6724e-256
AC091946.1	1.04772e-245	-2.67461	0.106028	0.301088	0.126335	0.446803	3.10271e-248
LINC00240	1.266e-241	-1.71294	0.129117	0.217188	0.128511	0.231386	3.87008e-244
LINC00862	1.2078e-240	-2.93389	0.0399239	0.141612	0.0375127	0.156593	3.80755e-243
ZBTB16	1.16382e-233	-4.84969	0.214814	0.922971	0.238004	3.92906	3.78009e-236
PLEKHA7	8.32791e-231	-3.37576	0.0633456	0.233363	0.0556512	0.310043	2.78446e-233
EPM2A	2.9345e-230	-1.49381	0.399905	0.534451	0.619947	0.967623	1.00919e-232
NNMT	7.41611e-230	-4.53408	0.016098	0.152723	0.0138252	0.175516	2.62129e-232
RGS22	1.13219e-225	-2.91546	0.0550945	0.19956	0.0564433	0.233386	4.10997e-228
ENTREP1	1.08547e-220	-3.61763	0.15834	0.448471	0.168535	1.10375	4.04407e-223
WWOX	5.90178e-220	-1.85553	0.889597	0.98037	4.90643	9.89076	2.25517e-222
SPON1	1.15252e-215	-3.66925	0.0716205	0.264615	0.0686751	0.46764	4.51406e-218
PDK4-AS1	9.22325e-214	-7.4703	0.00164071	0.118174	0.00128041	0.116933	3.70058e-216
CCDC122	6.2338e-211	-1.53858	0.156486	0.242668	0.177859	0.28539	2.56069e-213
KIF27	7.8063e-211	-1.58101	0.199929	0.29936	0.206597	0.342166	3.28121e-213
CYREN	5.7878e-207	-1.19495	0.398098	0.450238	0.502821	0.635646	2.48807e-209
LFNG	4.09535e-205	-3.67682	0.17206	0.645597	0.139287	0.993552	1.79964e-207
SPTSSB	2.21114e-201	-2.86377	0.084223	0.244827	0.0817487	0.3291	9.92773e-204
KCNN3	5.09936e-201	-2.75095	0.102437	0.287975	0.106478	0.398956	2.33826e-203
AC074286.1	4.52315e-194	-3.52626	0.0370943	0.20172	0.0380899	0.249627	2.11725e-196
GPAT3	1.32995e-191	4.86414	0.175056	0.00565349	0.233869	0.004423	6.35245e-194
SLC39A14	3.04889e-190	-2.0284	0.308501	0.454321	0.289941	0.641644	1.48542e-192
GATAD2A	1.66338e-188	1.38633	0.574177	0.208983	0.844926	0.177255	8.26287e-191
BHLHE40-AS1	3.91889e-184	-2.32048	0.109761	0.24679	0.110052	0.307118	1.98415e-186
AC026316.5	6.16012e-171	-4.41074	0.108097	0.566291	0.120582	1.44855	3.17775e-173
NKAIN3	2.70145e-170	-2.29351	0.164	0.34502	0.20186	0.547306	1.41937e-172
SAMD13	5.94518e-169	-3.31864	0.029937	0.144203	0.0271716	0.147945	3.18046e-171
AL445250.1	4.99327e-159	-3.88691	0.198193	0.738683	0.270934	2.30026	2.71892e-161
LINC00299	2.33268e-158	-5.73661	0.00447034	0.106396	0.00399388	0.112653	1.29246e-160
LINC01748	7.17044e-158	-5.31176	0.0200927	0.26434	0.0202771	0.464366	4.04142e-160
MAEL	1.357e-156	-2.3838	0.0393532	0.104118	0.0384824	0.109337	7.77797e-159
DNM1P46	4.31618e-156	-1.7296	0.317537	0.491696	0.421636	0.770625	2.51516e-158
GAS1RR	1.47721e-153	-3.46872	0.0228748	0.125947	0.0212815	0.132545	8.74925e-156
PHYHIPL	1.50028e-153	-3.08878	0.461134	0.888187	0.671776	3.28294	9.0292e-156
SQLE	8.36469e-152	2.16388	0.711235	0.161085	1.03623	0.127466	5.11406e-154
IQSEC2	1.609e-151	-1.96379	0.251409	0.416906	0.259453	0.554456	9.99095e-154
EFHB	2.94424e-151	-3.38539	0.0359054	0.175062	0.0308683	0.181195	1.85633e-153
NPHP1	3.62421e-151	-1.31867	0.178695	0.232775	0.19042	0.261676	2.31966e-153
TACC2	1.42584e-148	-1.98347	0.497349	0.724353	0.702628	1.50876	9.26223e-151
DSCAS	1.25231e-146	-3.32372	0.0306979	0.146166	0.0290888	0.158904	8.2546e-149
GYG2	3.81296e-146	-4.33618	0.0601593	0.399474	0.05059	0.572242	2.54974e-148
HOPX	4.3789e-146	-4.66001	0.0326953	0.253583	0.0203534	0.291773	2.97002e-148
POC1B-AS1	6.10505e-146	-1.81186	0.102532	0.183424	0.102146	0.199236	4.19912e-148
AFF2	7.20436e-146	3.7205	0.273475	0.0197087	0.473271	0.0203773	5.02406e-148
LIFR	2.78273e-145	-3.03119	0.545999	0.892191	0.900884	3.99797	1.96716e-147
SAXO2	2.2292e-144	-1.40288	0.102913	0.139099	0.0988308	0.144809	1.59715e-146
PKIG	3.42712e-144	-1.27886	0.396719	0.469318	0.496155	0.663549	2.48817e-146
AC113346.2	5.53577e-143	-3.60541	0.0240637	0.147187	0.0243587	0.16474	4.07198e-145
NKAIN4	1.6572e-140	-3.6439	0.0291999	0.188018	0.0207174	0.145463	1.23483e-142
ARHGAP11A-DT	3.18237e-140	-2.00122	0.0546903	0.114915	0.0496051	0.108888	2.40167e-142
OGFRL1	7.18658e-140	-2.79499	0.287504	0.617997	0.292816	1.1077	5.49223e-142
ASB3	1.45769e-139	-1.85569	0.336226	0.507989	0.380369	0.755058	1.12794e-141
AC022182.1	9.34237e-138	-3.3598	0.0336702	0.1709	0.0327464	0.190575	7.31825e-140
MAD2L1-DT	2.73232e-137	-1.51483	0.236286	0.331279	0.322161	0.514802	2.16644e-139
TPCN2	2.48323e-136	-2.24665	0.110879	0.236112	0.0915919	0.233734	1.99265e-138
SPATA13	8.79958e-134	-1.52873	0.168303	0.242982	0.143697	0.225667	7.14525e-136
DEFB109F	1.0083e-133	-1.97426	0.0874807	0.183935	0.0871467	0.188453	8.28371e-136
SLC25A27	1.44933e-131	-2.00698	0.33021	0.593027	0.415742	0.923534	1.20454e-133
SPTLC2	2.13226e-131	0.85705	0.638331	0.320835	1.01875	0.310709	1.7925e-133
FMN2	2.56636e-131	-1.585	0.631411	0.716972	1.24694	2.10128	2.18195e-133
AC090403.1	4.50194e-131	-6.72164	0.00463679	0.173295	0.00449017	0.258385	3.8706e-133
CAPRIN1	6.5248e-131	1.07047	0.77206	0.361745	1.40979	0.366923	5.67211e-133
SLC1A2	9.25569e-131	-2.46716	0.676828	0.925248	1.23539	3.85966	8.13454e-133
ELF1	4.20285e-129	-0.918383	0.554131	0.583801	0.948119	0.993636	3.73391e-131
LINC00987	1.04099e-128	-2.97732	0.0306503	0.120411	0.0281609	0.120726	9.34787e-131
FAM107A	7.24937e-128	-4.25702	0.0408988	0.273487	0.028801	0.300741	6.579e-130
RFTN1	9.77096e-128	-3.04854	0.13216	0.236151	0.135244	0.636624	8.96075e-130
AC244517.10	4.03336e-127	-1.63906	0.135561	0.217856	0.137883	0.238632	3.73744e-129
DAP3	2.78575e-126	1.01107	0.501367	0.187547	0.631818	0.17106	2.60798e-128
MDN1	6.24076e-126	-0.927717	0.43776	0.465863	0.545596	0.574105	5.90214e-128
IGSF3	1.56389e-125	-3.35023	0.0369754	0.147854	0.0262561	0.14484	1.49397e-127
AL137024.1	3.67827e-124	-2.29935	0.0618951	0.147423	0.0650143	0.17643	3.54896e-126
AC025265.1	5.49276e-124	-3.81524	0.0329568	0.218955	0.0315247	0.23458	5.35213e-126
BBOX1-AS1	1.73378e-123	-2.88702	0.0348829	0.147776	0.0315848	0.130995	1.70596e-125
GAREM1	1.32692e-122	-1.33355	0.624991	0.677516	1.24068	1.75232	1.3183e-124
KLF15	3.90821e-122	-4.74796	0.0257758	0.271053	0.0175698	0.265362	3.92016e-124
SYT1	7.69221e-122	3.16591	0.219593	0.0276	0.329038	0.0205443	7.78921e-124
PLAGL1	1.15878e-121	-1.5984	0.315087	0.493424	0.421603	0.704561	1.18446e-123
NT5DC3	2.42201e-121	-3.55353	0.400642	0.894154	0.527957	3.4189	2.49883e-123
ALDH1L1-AS2	4.91855e-120	-6.02322	0.00399477	0.113933	0.003207	0.112587	5.12153e-122
AJAP1	1.24397e-119	-3.44867	0.0418262	0.201248	0.0366588	0.21868	1.30719e-121
LRRC8B	2.30625e-119	-1.32394	0.21869	0.270504	0.236719	0.325703	2.44548e-121
CASTOR3P	7.42714e-119	-1.39798	0.545429	0.688116	0.807817	1.19362	7.9465e-121
FOXO1	8.06308e-119	-3.2818	0.208418	0.637588	0.253433	1.40941	8.70394e-121
SHTN1	2.13584e-118	1.27723	0.976721	0.767461	7.80365	1.7612	2.326e-120
SPARCL1	6.10089e-118	-3.85596	0.509143	0.866868	0.608977	4.69991	6.70235e-120
AHCYL1	8.36991e-118	-1.87448	0.343407	0.517883	0.359506	0.72748	9.27502e-120
MDM2	1.66964e-117	1.19987	0.887409	0.521731	2.78646	0.662441	1.86614e-119
SH3GL2	2.18565e-117	-1.10255	0.126977	0.142044	0.145953	0.17298	2.46376e-119
AC007364.1	2.97737e-116	-1.98554	0.146522	0.269365	0.173861	0.381759	3.38467e-118
AL592183.1	3.5354e-116	-1.40547	0.261919	0.362059	0.289066	0.426782	4.05281e-118
SEC24A	3.02356e-115	0.913717	0.577601	0.256684	0.843329	0.248507	3.49495e-117
LINC02774	5.01404e-114	-4.41131	0.0115087	0.116917	0.0108012	0.127385	5.84364e-116
N4BP2L1	5.20285e-114	-1.65423	0.196314	0.310785	0.204511	0.354431	6.11339e-116
CREM	1.09055e-113	-0.748217	0.560147	0.527698	0.87501	0.81118	1.29183e-115
ICA1	1.14782e-113	-0.893065	0.285341	0.306113	0.347977	0.357661	1.37063e-115
KLHL23	1.04566e-112	-1.21786	0.237213	0.28664	0.263178	0.33761	1.25863e-114
SLITRK5	1.40009e-111	-2.62905	0.181239	0.455773	0.168739	0.57524	1.69862e-113
ZFPM2	1.90961e-110	-3.11981	0.281013	0.715088	0.484543	2.2489	2.33502e-112
LINC02698	4.01372e-109	-5.14813	0.0130781	0.169565	0.0110179	0.217415	4.94621e-111
BCL6	1.4523e-108	-2.77077	0.397503	0.776295	0.493465	1.91547	1.80358e-110
BCR	2.88743e-108	-2.37854	0.259589	0.525696	0.267745	0.785905	3.61343e-110
AC091948.1	3.74989e-108	-2.39555	0.14141	0.341055	0.16554	0.490946	4.72855e-110
ENTPD1-AS1	1.55247e-107	-1.45516	0.563976	0.678262	0.986888	1.51771	1.97247e-109
SHISA6	2.50801e-107	-1.37836	0.372916	0.490205	0.548369	0.779319	3.21048e-109
DBX2-AS1	3.76166e-107	-3.56028	0.0926644	0.437203	0.0992823	0.659438	4.85121e-109
ADCY2	1.72514e-105	-3.19861	0.113589	0.339916	0.156028	0.767133	2.24129e-107
TYRO3	4.527e-105	-1.63318	0.322292	0.444113	0.286983	0.49123	5.92472e-107
LRFN2	1.29697e-104	-3.81222	0.0464154	0.278827	0.0447727	0.344651	1.7098e-106
ANKRD44	1.61878e-102	-1.17133	0.486934	0.60618	0.755611	0.942557	2.14951e-104
CADM2	2.83555e-101	-1.88949	0.894543	0.984492	5.19939	10.9439	3.79229e-103
TF	6.63029e-101	-3.96224	0.0752348	0.38216	0.0519797	0.474387	8.93075e-103
GBX2-AS1	1.14467e-100	-2.89409	0.277779	0.675945	0.414504	1.66929	1.55276e-102
TENM2	2.28741e-100	-2.49661	0.0558792	0.156413	0.0692065	0.219073	3.12476e-102
PHKA1	2.37754e-100	-1.49693	0.294139	0.401515	0.347847	0.539272	3.27059e-102
RFLNA	5.98207e-100	-1.32585	0.213245	0.272467	0.247958	0.339495	8.28621e-102
LINC01285	5.29839e-98	-2.43241	0.0895732	0.242315	0.0902393	0.263586	7.3898e-100
STEAP2	4.00882e-97	-1.5007	0.137201	0.200071	0.13027	0.198552	5.6295e-99
ELMOD1	4.49903e-97	-1.50673	0.506194	0.625574	0.74446	1.18597	6.36087e-99
TTC6	1.14149e-96	-2.89521	0.0479134	0.194535	0.0430577	0.180173	1.62478e-98
DRAIC	6.13694e-96	-1.92924	0.160005	0.301755	0.187081	0.398995	8.79386e-98
AF279873.3	1.17931e-95	-3.20781	0.0287956	0.122021	0.0304012	0.157398	1.70115e-97
PHYHD1	2.24925e-94	-3.15743	0.0640352	0.245142	0.0505619	0.252902	3.26601e-96
PLAAT1	2.5974e-94	-3.20913	0.0717869	0.278277	0.0696097	0.36664	3.79635e-96
ATP2C2	4.16292e-94	-3.47444	0.0564737	0.249303	0.0463254	0.284567	6.12429e-96
NAALAD2	8.67538e-94	-2.67799	0.0901914	0.26858	0.0859032	0.31398	1.28457e-95
CPVL-AS2	1.07716e-93	-4.75337	0.0176673	0.18527	0.0151486	0.235389	1.60525e-95
AC068724.3	5.58519e-93	-0.972288	0.186946	0.201563	0.180673	0.194906	8.37672e-95
ITPRID1	6.37943e-92	-5.1775	0.0236357	0.236033	0.0243401	0.499032	9.62887e-94
LEKR1	3.08553e-91	-2.12945	0.0672453	0.142868	0.0687014	0.167463	4.68665e-93
HSPB8	3.77214e-91	-3.81532	0.0352633	0.147776	0.0253466	0.190976	5.7656e-93
AL589740.1	4.7901e-91	-3.09168	0.095708	0.330219	0.107473	0.512948	7.36727e-93
MRPS30-DT	8.89271e-91	-0.93567	0.27445	0.282792	0.319908	0.335907	1.37621e-92
AHCTF1	2.21876e-90	-0.787131	0.529854	0.505791	0.73553	0.701834	3.45489e-92
ABCC8	2.52755e-89	-3.32711	0.0440613	0.199403	0.0399725	0.21056	3.95986e-91
CA13	3.04758e-89	-1.42625	0.173606	0.243807	0.182522	0.270769	4.80369e-91
KCNT2	4.83201e-89	-1.93513	0.297349	0.525971	0.431386	0.91788	7.66253e-91
PTPRT	8.42059e-89	-4.74625	0.0613245	0.497664	0.0791443	1.18295	1.34337e-90
WNK2	1.89249e-88	-3.17104	0.0370467	0.131483	0.0332035	0.158681	3.03724e-90
MEGF10	4.01878e-88	-3.48729	0.0613245	0.272899	0.0587436	0.366137	6.48809e-90
FAM169A	4.32782e-88	-0.975969	0.583973	0.589141	0.965771	1.04061	7.02837e-90
GHR	1.96119e-87	-1.49235	0.318535	0.421224	0.477626	0.729734	3.2037e-89
AC107067.1	3.36198e-87	-2.99185	0.0402806	0.165914	0.0404279	0.181428	5.52407e-89
SLCO1A2	6.64753e-87	-6.27452	0.0128879	0.376664	0.011234	0.497542	1.09861e-88
PACRG	1.1811e-86	-1.52732	0.474307	0.638648	0.834844	1.35551	1.96323e-88
FBXO31	1.68716e-86	-2.35572	0.180526	0.383181	0.158461	0.453895	2.82053e-88
LINC02863	3.1026e-86	-1.4251	0.536298	0.674532	0.863637	1.29574	5.21645e-88
STAB2	4.5532e-86	-3.14918	0.0407086	0.178988	0.035758	0.171457	7.69886e-88
FAM66C	6.14487e-86	-1.57628	0.443229	0.627576	0.628381	1.03227	1.04489e-87
MAILR	6.86712e-86	-1.83223	0.32291	0.531821	0.417768	0.838003	1.17426e-87
RPSAP3	1.11899e-85	-3.37581	0.1781	0.596011	0.203692	1.2248	1.92413e-87
ELN	1.27084e-85	-4.31111	0.0687671	0.436732	0.0579871	0.664048	2.19739e-87
NPSR1	4.25995e-85	-6.44312	0.0128165	0.26273	0.0116501	0.588809	7.40648e-87
ADGRA3	2.17067e-84	-1.15844	0.289098	0.331436	0.352734	0.428638	3.79474e-86
PIWIL4	5.33439e-84	-1.91816	0.0615385	0.128538	0.05823	0.123584	9.37646e-86
LAMC1	6.07246e-84	1.4752	0.562311	0.173688	0.822645	0.159879	1.07318e-85
TMCC3	6.99956e-84	-3.1374	0.148781	0.49468	0.143368	0.711548	1.24371e-85
AKAP7	1.04374e-83	-1.71003	0.245797	0.399199	0.296289	0.539954	1.86454e-85
HMGN5	1.14465e-83	-1.46289	0.168969	0.23246	0.192302	0.289146	2.05574e-85
GRM7	3.31545e-83	-1.34819	0.700915	0.808959	2.1138	2.9956	5.98606e-85
LINC01473	5.01195e-83	-1.37949	0.167091	0.235994	0.187129	0.271527	9.09696e-85
VSIR	6.40006e-83	-4.94271	0.0143621	0.160575	0.00759087	0.132856	1.16776e-84
JHY	8.27465e-83	-2.2718	0.0771133	0.185309	0.0768808	0.198096	1.5177e-84
STON1-GTF2A1L	1.65945e-82	-3.35803	0.0220663	0.107809	0.0204548	0.115698	3.05955e-84
B3GLCT	2.49474e-82	-1.25441	0.181881	0.194496	0.190415	0.248099	4.62341e-84
AGBL3	4.43189e-82	-1.04507	0.329687	0.37792	0.389385	0.438416	8.25581e-84
TASOR2	6.15539e-82	0.735456	0.82423	0.485572	2.05196	0.677227	1.15252e-83
SYNCRIP	7.62873e-82	1.01099	0.688218	0.295552	1.0493	0.285018	1.43567e-83
AL122035.1	2.20325e-81	-1.21256	0.123243	0.151977	0.121194	0.156154	4.16741e-83
ASXL3	7.38494e-81	-1.35717	0.298894	0.397432	0.379236	0.542478	1.4039e-82
C10orf143	2.07072e-80	-1.50112	0.102937	0.151623	0.0938249	0.147774	3.95628e-82
MIR4500HG	3.00563e-80	-3.65332	0.073713	0.391661	0.0789105	0.562509	5.79993e-82
GNB1	3.00563e-80	1.00275	0.740625	0.390169	1.32885	0.364538	5.77998e-82
LINC00506	6.38092e-80	-2.40209	0.107811	0.278866	0.117074	0.347179	1.23742e-81
DPY19L1	1.25182e-79	-1.3227	0.689597	0.722037	1.15757	1.61065	2.43954e-81
LRP2BP	2.4658e-79	-1.30601	0.288836	0.373915	0.331524	0.455633	4.8289e-81
RET	2.82128e-79	-2.18382	0.0532636	0.127321	0.0406276	0.0990065	5.55201e-81
BOC	5.2206e-79	-3.01918	0.082939	0.244199	0.0892424	0.398411	1.03235e-80
MIPOL1	6.9299e-79	-0.991852	0.545714	0.607436	1.0322	1.1404	1.37698e-80
LINC02427	6.96864e-79	-1.2497	0.135323	0.171921	0.146854	0.192147	1.39133e-80
ENOSF1	7.36325e-79	-1.15244	0.51542	0.602725	0.810318	1.00195	1.47715e-80
SYNM-AS1	8.25759e-79	-1.73973	0.0943526	0.163559	0.0969109	0.18094	1.66446e-80
CHST9	2.0647e-78	-5.31426	0.0304126	0.410742	0.0301968	0.6605	4.18148e-80
RCBTB1	3.32726e-78	-0.92096	0.280751	0.281104	0.284874	0.294906	6.77022e-80
ZBED5	3.61258e-78	-1.42824	0.300226	0.381296	0.303806	0.450948	7.38528e-80
FSIP2	1.29798e-77	-1.62062	0.202354	0.323152	0.221715	0.383035	2.66589e-79
AC104123.1	1.60692e-77	-1.02818	0.433718	0.442425	0.723253	0.81636	3.31576e-79
SAE1	1.78411e-77	1.52727	0.381786	0.104315	0.402631	0.0773545	3.69844e-79
AC068643.1	3.24148e-77	-6.72292	0.00294852	0.124809	0.00243102	0.150498	6.7505e-79
CXXC5	3.94944e-77	1.47875	0.751088	0.315614	1.39418	0.274889	8.26258e-79
DOCK7-DT	7.07361e-77	-2.97427	0.0463441	0.18629	0.046787	0.205003	1.48662e-78
EIF4E3	9.39468e-77	-0.980125	0.251956	0.277571	0.2917	0.316529	1.9834e-78
REPS2	8.40811e-76	-1.41755	0.157603	0.221153	0.16908	0.247984	1.78315e-77
HS6ST3	4.52421e-75	-2.08552	0.414124	0.688587	0.95039	2.17246	9.63793e-77
SPEF2	2.11566e-74	-1.46489	0.243419	0.340348	0.277458	0.42379	4.52721e-76
AHRR	2.22665e-74	3.44006	0.293901	0.0239095	0.370547	0.0182358	4.78598e-76
EPCAM-DT	2.24203e-74	-3.47693	0.0342171	0.192336	0.0319289	0.20377	4.84045e-76
GALNT8	2.29657e-74	-1.29413	0.190822	0.254564	0.200174	0.271036	4.98013e-76
DLG5	2.34335e-74	-1.44123	0.485055	0.588944	0.624106	0.948985	5.10397e-76
DTNA	3.48012e-74	-2.3334	0.968827	0.96973	7.04715	20.2125	7.61318e-76
LMBRD1	3.841e-74	-1.15205	0.541196	0.585607	0.702795	0.869925	8.43933e-76
RSAD2	6.30506e-74	-1.77837	0.0715492	0.122728	0.0670959	0.127782	1.39135e-75
GNAO1-DT	8.4376e-74	-1.38686	0.161075	0.219976	0.188161	0.275236	1.87001e-75
FST	9.13181e-74	2.39169	0.22763	0.0257548	0.204405	0.0209253	2.03259e-75
ADGRB3-DT	1.23162e-73	-2.01707	0.357936	0.608221	0.402144	0.903787	2.75313e-75
NR2F2-AS1	5.36717e-73	-2.95179	0.152158	0.430764	0.18479	0.786112	1.2049e-74
RBM26-AS1	6.4965e-73	-1.40206	0.0805374	0.106788	0.072188	0.105368	1.46463e-74
LINC00472	8.87808e-73	-1.25796	0.203543	0.270268	0.239819	0.318778	2.01004e-74
CCDC65	9.11677e-73	1.94163	0.348662	0.0782851	0.38404	0.0549654	2.07279e-74
ATP13A4	9.7389e-73	-4.91119	0.11825	0.78662	0.118355	2.0788	2.22353e-74
NMNAT3	2.49458e-72	-1.54484	0.216954	0.338346	0.23713	0.38817	5.71933e-74
CFAP54	9.27912e-72	-3.28414	0.0817263	0.315182	0.0887046	0.478166	2.13629e-73
ARMCX4	4.33575e-71	-1.12799	0.652978	0.732009	1.19481	1.45826	1.00234e-72
RAB7A	6.08176e-71	0.664041	0.828106	0.507361	1.8155	0.632295	1.4118e-72
IQCH-AS1	1.0933e-70	-1.5641	0.133539	0.208237	0.133999	0.224287	2.54838e-72
FTCDNL1	1.27454e-70	-2.31945	0.129735	0.310274	0.139132	0.393011	2.98301e-72
NEGR1	1.5828e-70	-2.90893	0.240732	0.622119	0.345947	1.46306	3.7196e-72
SESN3	2.68081e-70	1.45689	0.679253	0.248439	1.2596	0.248459	6.32557e-72
RAB30-DT	2.85065e-70	-0.842641	0.503412	0.505987	0.728866	0.717308	6.75355e-72
ZNF385D	6.18697e-70	-1.2272	0.366163	0.444898	0.665744	0.866816	1.47168e-71
SPATA6L	6.26496e-70	-1.35131	0.185662	0.253661	0.20186	0.287928	1.49622e-71
POT1-AS1	8.48667e-70	-1.94075	0.139341	0.261709	0.174923	0.377568	2.03492e-71
CORO2B	1.35804e-69	1.49983	0.649174	0.244121	1.24226	0.239461	3.26927e-71
EML5	5.39746e-69	-1.9128	0.17684	0.32221	0.192365	0.40042	1.30451e-70
KCTD3	4.21359e-68	-2.32676	0.345429	0.619332	0.404988	1.13117	1.0224e-69
LINC03022	6.10404e-68	-1.18628	0.0790394	0.101763	0.0789937	0.0988786	1.48694e-69
ADAM22	9.03471e-68	-1.20502	0.508382	0.598445	0.782994	1.00759	2.20948e-69
MICALL1	1.00688e-67	1.27889	0.191368	0.0561423	0.186932	0.0426024	2.47199e-69
PJA2	1.06469e-67	1.35837	0.978813	0.721252	5.52387	1.19236	2.62408e-69
AL158055.1	1.54198e-67	-1.39636	0.15834	0.223038	0.172776	0.255651	3.81517e-69
DLG2	2.03665e-67	-1.62128	0.789918	0.921283	3.23757	5.58513	5.05855e-69
SEC24B-AS1	2.6022e-67	-1.60515	0.081869	0.131836	0.0789342	0.133835	6.4881e-69
HMGCLL1	2.89981e-67	-2.31496	0.0754488	0.187311	0.082514	0.231046	7.25784e-69
CKAP5	3.07806e-67	0.801418	0.692094	0.352636	1.17521	0.374293	7.73338e-69
AC006978.2	3.32508e-67	-1.86824	0.1124	0.209964	0.104379	0.21302	8.38575e-69
SLC6A11	6.87245e-67	-5.4015	0.0169778	0.207648	0.0119184	0.256813	1.73978e-68
INTS6-AS1	1.72563e-66	-1.35973	0.101462	0.143811	0.0905976	0.130409	4.38495e-68
NUP43	2.58683e-66	-0.887785	0.223564	0.228338	0.219122	0.223435	6.59805e-68
ZNRF1	3.11173e-66	1.24349	0.519914	0.18099	0.727825	0.168835	7.96661e-68
CACNA1C	1.02587e-65	-0.997343	0.861277	0.886498	3.35997	3.66547	2.63622e-67
GNPTAB	1.30145e-65	-1.40948	0.726977	0.771701	1.22384	1.79735	3.35682e-67
PSORS1C1	1.43792e-65	-2.2846	0.0483177	0.112167	0.0425692	0.1152	3.72254e-67
DYNC2LI1	2.90832e-65	-0.787963	0.252645	0.240901	0.277694	0.260925	7.55696e-67
NBN	4.19105e-65	-0.867861	0.513518	0.507832	0.711467	0.710607	1.093e-66
LOXL2	7.3883e-65	-2.47561	0.0982761	0.191747	0.0899537	0.26681	1.93389e-66
NFATC2	1.51031e-64	-3.28812	0.0866009	0.311413	0.0971158	0.519565	3.96766e-66
ALOX12-AS1	1.60059e-64	-0.77528	0.419308	0.417848	0.64351	0.604405	4.22013e-66
ADCY1	1.70562e-64	-2.51305	0.234574	0.530486	0.25974	0.804595	4.51334e-66
KIRREL3	2.32133e-64	-1.85886	0.172798	0.310392	0.2694	0.547998	6.16477e-66
TRHDE	3.27079e-64	-2.88564	0.120913	0.377213	0.1386	0.565793	8.71752e-66
RBBP6	9.30044e-64	-0.973684	0.570491	0.597856	0.778986	0.845181	2.4877e-65
ZNF334	9.61259e-64	-1.1897	0.300606	0.366809	0.34329	0.43687	2.58038e-65
MYOM1	1.22529e-63	-3.77822	0.0684104	0.386165	0.0674828	0.535559	3.30084e-65
PAH	1.55764e-63	-4.10687	0.0229937	0.186212	0.0214547	0.214712	4.21105e-65
PSMD1	1.66657e-63	0.557714	0.74336	0.416788	1.41658	0.530289	4.52145e-65
ADHFE1	1.88288e-63	-2.17064	0.184449	0.401201	0.19376	0.491774	5.12631e-65
CA1	1.97325e-63	-1.45036	0.078112	0.121471	0.0769963	0.116622	5.3912e-65
ZCWPW1	4.5417e-63	-1.6966	0.092593	0.154921	0.0825784	0.151185	1.24519e-64
ANK2	7.21249e-63	-0.81992	0.896279	0.90762	3.79899	3.71229	1.98433e-64
AMOT	1.05332e-62	-2.50038	0.0631554	0.159201	0.0542159	0.165216	2.90799e-64
DBX2	1.12741e-62	-2.30046	0.0831768	0.212241	0.0797733	0.220672	3.12332e-64
EMID1	1.67466e-62	-3.1791	0.0732612	0.262809	0.0468	0.231302	4.65539e-64
LIX1	2.12005e-62	-4.5322	0.00996314	0.100663	0.00818522	0.104154	5.91378e-64
CPB2-AS1	1.23894e-61	-1.08067	0.192581	0.221742	0.223722	0.266348	3.46779e-63
BBOX1	1.25203e-61	-4.77233	0.0531685	0.444388	0.0486041	0.760803	3.5164e-63
ILRUN	1.6424e-61	0.805774	0.41139	0.176907	0.523514	0.164183	4.62846e-63
ITPKC	2.70729e-61	-1.4744	0.206991	0.262652	0.197424	0.301823	7.65531e-63
MSH2	2.74418e-61	-0.65763	0.398431	0.371364	0.50699	0.441391	7.78585e-63
GYG1	2.81314e-61	-1.41739	0.177815	0.212909	0.144461	0.209965	8.00835e-63
WDR5B-DT	3.86139e-61	-0.895086	0.226442	0.220565	0.221519	0.227	1.10294e-62
GRIA2	7.1992e-61	-1.6554	0.664844	0.840839	1.33035	2.34055	2.0632e-62
MAST4	1.01097e-60	-1.79075	0.320081	0.533548	0.464454	0.910904	2.90699e-62
CABCOCO1	1.23496e-60	-3.11605	0.0500535	0.190884	0.0544754	0.254575	3.56284e-62
RIMBP2	1.25303e-60	-1.30138	0.251195	0.316713	0.308156	0.419774	3.62694e-62
OTUD7B	1.55743e-60	-1.15589	0.358007	0.413647	0.448788	0.546801	4.52292e-62
CUBN	1.63795e-60	-1.38356	0.121127	0.175297	0.138033	0.19904	4.7724e-62
KBTBD11	2.75433e-60	-2.51662	0.0458447	0.136744	0.0366616	0.113918	8.05144e-62
NMD3	3.36239e-60	-1.07955	0.563833	0.574811	0.851287	0.985998	9.86103e-62
TNFRSF10D	3.65133e-60	1.76541	0.362287	0.0777747	0.382135	0.0613816	1.07433e-61
HSP90B1	4.79108e-60	2.26818	0.926739	0.547171	5.58128	0.631472	1.41426e-61
ZNF823	4.92411e-60	-1.72907	0.104268	0.158612	0.0929274	0.170861	1.45823e-61
AKIRIN2	4.9827e-60	1.13808	0.406159	0.13321	0.409906	0.101337	1.48034e-61
CDC42EP4	8.51738e-60	-1.77635	0.0663179	0.105296	0.0446086	0.0857041	2.53862e-61
GJC1	1.92941e-59	2.64958	0.100868	0.013113	0.108626	0.00943633	5.76907e-61
ATP13A5	2.37468e-59	-4.87576	0.0160266	0.215814	0.0140748	0.241019	7.12313e-61
TRPC1	2.63118e-59	-0.59779	0.689454	0.651368	1.40033	1.16397	7.91767e-61
ANK3	4.55887e-59	-0.52265	0.678849	0.633308	2.03217	1.61175	1.3762e-60
DAPK1	4.8275e-59	-2.80738	0.106004	0.247065	0.131674	0.525545	1.4619e-60
TXNL4B	5.22584e-59	-1.58702	0.144644	0.200149	0.127713	0.212867	1.58752e-60
LSM6	8.25243e-59	-1.62365	0.168113	0.238507	0.136214	0.22855	2.51483e-60
NPLOC4	1.09047e-58	0.851488	0.393413	0.169801	0.472053	0.14288	3.33349e-60
SLC2A3	1.80527e-58	1.5054	0.531352	0.154018	0.671106	0.132027	5.53584e-60
EYA2	1.80722e-58	-1.10777	0.384948	0.482352	0.613875	0.740487	5.55908e-60
ZMAT1	1.92063e-58	-1.45324	0.582119	0.752346	1.03576	1.5839	5.92628e-60
NUFIP2	2.05661e-58	0.787517	0.605992	0.3036	0.936516	0.297886	6.3655e-60
LINC02981	2.30012e-58	-2.58044	0.182689	0.480939	0.209239	0.714718	7.14117e-60
ZNF708	3.8077e-58	-1.38311	0.626798	0.749912	1.12138	1.6214	1.18581e-59
AC009318.1	7.9418e-58	-2.15674	0.158102	0.330494	0.164875	0.411715	2.48086e-59
PIK3R3	1.03246e-57	4.76708	0.201736	0.00624239	0.217463	0.00449427	3.23508e-59
SEC14L2	1.21212e-57	-1.8464	0.2258	0.361156	0.218682	0.425252	3.80959e-59
MEST	1.26729e-57	-1.52169	0.282677	0.390051	0.268513	0.42709	3.99508e-59
AMER2	1.29401e-57	-2.13751	0.109713	0.227357	0.0862347	0.211232	4.09167e-59
SEC24D	1.30451e-57	1.1948	0.493401	0.185741	0.770046	0.187427	4.13736e-59
TK2	1.88755e-57	-1.0928	0.36369	0.391269	0.392944	0.462939	6.00452e-59
AC079385.1	1.89845e-57	-1.5429	0.244727	0.378744	0.287524	0.470147	6.05732e-59
KCNMB4	2.48916e-57	-2.68157	0.402758	0.768364	0.565846	1.97355	7.96588e-59
CNGA3	2.49693e-57	-3.56917	0.0314112	0.171293	0.027855	0.16802	8.0146e-59
CCDC146	2.77485e-57	-1.72087	0.336488	0.507793	0.439694	0.795694	8.93317e-59
BLTP1	2.98018e-57	-0.685017	0.699441	0.682462	1.30694	1.16134	9.62267e-59
HMGCR	4.01142e-57	1.97258	0.739817	0.205017	1.18203	0.163674	1.29907e-58
HSD17B4	4.05119e-57	-0.662716	0.56759	0.493385	0.73803	0.640227	1.31582e-58
SPOCK1	5.75706e-57	-1.47805	0.864225	0.925091	2.86262	4.44409	1.87539e-58
AP001825.1	6.23716e-57	-1.46653	0.131875	0.197048	0.134359	0.204916	2.03774e-58
RPL5P24	8.68936e-57	-2.39839	0.0432053	0.135919	0.0384532	0.11598	2.8472e-58
DSCAM	1.81508e-56	-2.21548	0.708429	0.878057	2.90172	7.58682	5.96471e-58
TMEM161B-DT	2.65377e-56	-0.869925	0.79824	0.815005	2.20337	2.24958	8.74619e-58
PLEKHA1	3.0476e-56	-1.27932	0.366996	0.441679	0.446004	0.605354	1.00733e-57
CYFIP1	3.1343e-56	0.755842	0.684461	0.369636	1.06332	0.346997	1.04197e-57
PTPN21	3.1343e-56	-0.521957	0.455023	0.408582	0.632367	0.501305	1.03906e-57
DNAH5	3.51946e-56	-2.40603	0.124932	0.299713	0.137231	0.390853	1.17338e-57
SLITRK3	3.96229e-56	-1.73318	0.108311	0.184641	0.0848501	0.152837	1.3248e-57
LINC00407	4.09037e-56	-2.98822	0.0311972	0.126104	0.03133	0.13175	1.37153e-57
GPD1L	4.29751e-56	-1.93127	0.112781	0.197715	0.0912049	0.196075	1.44509e-57
PTGR3	5.01621e-56	-0.748671	0.277518	0.253936	0.275312	0.255588	1.69156e-57
KBTBD2	5.20977e-56	0.74453	0.53021	0.264183	0.72172	0.234771	1.76181e-57
PEX1	5.58075e-56	-0.700553	0.45167	0.420557	0.577337	0.514359	1.89259e-57
CIBAR1-DT	7.05793e-56	-1.57901	0.134657	0.192258	0.141853	0.235561	2.40029e-57
AC087564.1	7.83711e-56	-2.18308	0.399667	0.671038	0.651197	1.59357	2.67276e-57
MYO9A	1.13687e-55	-1.00401	0.932945	0.951945	4.05243	4.51602	3.88804e-57
AMZ1	1.74577e-55	-1.44373	0.272952	0.374858	0.281473	0.421626	5.98713e-57
CAMKK1	1.91224e-55	1.88172	0.110023	0.0250874	0.100133	0.0149786	6.57628e-57
JADE2	2.70323e-55	-0.983806	0.238093	0.25268	0.212127	0.232393	9.32238e-57
LINC02340	3.80071e-55	-1.39262	0.297539	0.412626	0.38306	0.564383	1.31435e-56
AGBL1	4.6365e-55	-3.35148	0.0755202	0.32009	0.096257	0.566007	1.6078e-56
CHST15	5.42858e-55	-1.91051	0.314374	0.479604	0.354951	0.729168	1.88766e-56
EIF3H	5.99204e-55	0.574221	0.677232	0.363354	1.13045	0.415546	2.08931e-56
CMYA5	8.7757e-55	-1.53964	0.563524	0.749323	1.09335	1.71827	3.06831e-56
MXI1	1.39706e-54	-1.91353	0.679895	0.877233	1.30861	2.80029	4.89797e-56
AC007938.3	1.39812e-54	-1.97668	0.0522649	0.112991	0.0510676	0.110695	4.91505e-56
MIR181A1HG	2.46228e-54	2.32926	0.785115	0.239645	2.37771	0.259889	8.67959e-56
PWAR6	3.04192e-54	-1.03653	0.311188	0.357308	0.370098	0.425619	1.07519e-55
SULF1	3.10614e-54	-4.58978	0.0483652	0.399395	0.044846	0.605577	1.10086e-55
ASIC2	3.85202e-54	-2.0692	0.249697	0.45915	0.336975	0.760944	1.36889e-55
EPM2A-DT	4.89298e-54	-0.907318	0.408917	0.426799	0.54019	0.566833	1.74348e-55
COL28A1	5.72134e-54	-3.08857	0.0469385	0.196223	0.0455564	0.222703	2.04412e-55
ADAMTS17	8.86091e-54	-1.91508	0.171989	0.29457	0.210222	0.427981	3.17429e-55
CLVS1	2.22706e-53	-2.55223	0.2034	0.490126	0.265909	0.868761	7.99938e-55
COL6A1	2.88728e-53	-1.43145	0.451861	0.557261	0.438668	0.637532	1.03984e-54
UBE2R2	2.90706e-53	0.693291	0.731732	0.416631	1.43361	0.490507	1.04974e-54
NOD1	3.07503e-53	-1.78491	0.128165	0.192415	0.129786	0.25397	1.11333e-54
AC073941.1	3.28775e-53	-4.24591	0.03455	0.203722	0.0413129	0.44749	1.19349e-54
FANK1	4.18776e-53	-1.34114	0.170158	0.206431	0.203806	0.284248	1.5242e-54
SCRN1	4.23713e-53	-0.579482	0.722958	0.63323	1.22968	1.00662	1.54622e-54
STOX1	4.82284e-53	-1.97147	0.0722863	0.146441	0.0720846	0.15684	1.76457e-54
NTRK3	5.53493e-53	-1.31663	0.843871	0.93628	2.93426	4.05823	2.03039e-54
NSMCE1-DT	1.18585e-52	-1.80291	0.0795149	0.146166	0.0798015	0.151033	4.3614e-54
LINC02256	1.3023e-52	-1.42935	0.245892	0.357858	0.28867	0.425076	4.80214e-54
CATSPERE	1.49603e-52	-1.43349	0.121484	0.179341	0.135772	0.207914	5.5308e-54
CEP83	1.65187e-52	-0.820735	0.485721	0.499038	0.773064	0.751442	6.1227e-54
TMBIM7P	1.99296e-52	-1.10447	0.210177	0.239959	0.222185	0.260536	7.40603e-54
TMEM104	2.28886e-52	1.24022	0.130852	0.0398885	0.108436	0.0253246	8.52748e-54
AP002518.2	2.70881e-52	-2.69038	0.0331471	0.108437	0.0260867	0.0939066	1.01179e-53
LINC01322	2.9692e-52	-4.03883	0.183759	0.777237	0.246405	2.4163	1.11189e-53
GRAMD2B	3.65462e-52	-2.73422	0.289502	0.589965	0.345103	1.27613	1.37205e-53
RGS20	5.16806e-52	-2.48442	0.242183	0.478937	0.295257	0.887336	1.95012e-53
TTL	5.16806e-52	0.938498	0.46394	0.192336	0.609992	0.17518	1.94893e-53
SRPX	1.46918e-51	-2.79565	0.451052	0.724628	0.473997	1.78856	5.57188e-53
MSANTD3	1.46918e-51	1.69839	0.381358	0.0903773	0.449457	0.0756075	5.57189e-53
KLF9	1.48608e-51	-3.14217	0.102342	0.389737	0.0869225	0.43374	5.65015e-53
MOK	1.52812e-51	-1.16535	0.361836	0.421106	0.431841	0.534934	5.82459e-53
WDR91	2.05368e-51	-1.34941	0.177577	0.213851	0.159774	0.218599	7.84747e-53
SLC25A36	6.67822e-51	-0.914247	0.535228	0.53983	0.722807	0.750507	2.55824e-52
REPS1	7.41333e-51	-1.16998	0.631126	0.70221	1.14722	1.43006	2.84692e-52
PDK1	8.76284e-51	-1.35493	0.112163	0.147619	0.102837	0.147026	3.37354e-52
DUBR	8.90573e-51	-0.960926	0.412175	0.43524	0.572097	0.613707	3.43706e-52
TMEM232	1.42361e-50	-1.59653	0.379598	0.537867	0.599753	1.0252	5.50787e-52
ACSS1	1.66799e-50	-2.14241	0.152586	0.304425	0.130225	0.322741	6.46927e-52
RBL2	2.08098e-50	-0.800251	0.474664	0.482235	0.621807	0.60173	8.09095e-52
AL117335.1	2.34428e-50	-2.07326	0.0509333	0.104707	0.0441785	0.099374	9.13706e-52
TIGAR	2.70002e-50	1.42926	0.772227	0.315143	1.75048	0.355614	1.05494e-51
LINC02307	3.9122e-50	-2.43028	0.0575912	0.153586	0.0672195	0.20698	1.53229e-51
VASH1-DT	4.03781e-50	-2.94324	0.15211	0.486907	0.167823	0.732643	1.5892e-51
RASSF4	4.03781e-50	-2.83422	0.444846	0.759766	0.537514	2.14283	1.58898e-51
NR3C2	5.63974e-50	-2.03411	0.216336	0.431314	0.274425	0.613049	2.22508e-51
PAXBP1-AS1	5.78478e-50	-1.554	0.121745	0.179066	0.117032	0.189777	2.28783e-51
PARD3	6.23721e-50	-1.19393	0.964808	0.984846	6.05711	7.77899	2.47272e-51
STXBP1	6.56676e-50	0.415318	0.627749	0.37262	1.03661	0.428431	2.60964e-51
ACTR3B	6.60517e-50	1.14125	0.562953	0.225276	0.899523	0.223447	2.63122e-51
GNA12	7.54684e-50	-1.04485	0.648674	0.697067	1.07935	1.24001	3.01355e-51
ELAVL4	1.73228e-49	-1.57469	0.107645	0.17412	0.109572	0.1828	6.93377e-51
AGFG2	1.84253e-49	-1.11534	0.281037	0.315614	0.293762	0.350463	7.39266e-51
AC012409.2	2.36734e-49	-2.2764	0.0656997	0.173217	0.0625702	0.165571	9.52091e-51
PPP2R5D	2.81654e-49	1.32166	0.175342	0.0516273	0.141431	0.0305567	1.13544e-50
NME5	2.9866e-49	-1.19084	0.167709	0.20384	0.167843	0.210888	1.20685e-50
NAIP	3.66494e-49	-0.755332	0.367281	0.364689	0.450019	0.415893	1.48446e-50
RNPC3	3.98264e-49	-0.966207	0.443443	0.478309	0.592932	0.645326	1.61695e-50
SEC14L1	5.79608e-49	-1.07171	0.475116	0.448628	0.584413	0.671646	2.35874e-50
AC099792.1	7.03651e-49	-4.10986	0.0390441	0.265047	0.0399306	0.404798	2.87026e-50
PELI2	8.41336e-49	-0.838782	0.532041	0.560481	0.98176	0.976674	3.43993e-50
PEBP4	8.62483e-49	-0.989475	0.116229	0.123317	0.112504	0.122906	3.53463e-50
LARP1	2.29649e-48	0.716649	0.804447	0.461545	1.58038	0.528583	9.43341e-50
GUCY1A2	2.31828e-48	-1.02987	0.451124	0.519846	0.761523	0.855785	9.54506e-50
KPNB1	2.34625e-48	1.23019	0.616502	0.239881	0.797479	0.188709	9.68267e-50
TIPARP	2.71976e-48	-1.27898	0.264297	0.293864	0.308362	0.415212	1.12501e-49
CPD	3.19002e-48	-0.802676	0.447343	0.402301	0.558964	0.542642	1.32257e-49
AL357153.2	3.67938e-48	-1.04499	0.539365	0.595776	0.95114	1.08828	1.52898e-49
ANK1	3.94766e-48	-1.05274	0.254738	0.294138	0.294702	0.331097	1.64423e-49
BAZ1B	4.11361e-48	0.662801	0.723743	0.412665	1.29794	0.449343	1.71728e-49
ERRFI1	5.67716e-48	-1.28851	0.165878	0.210121	0.153364	0.207656	2.37543e-49
CENPK	5.95421e-48	3.11757	0.224682	0.02654	0.410358	0.0265434	2.49703e-49
CASTOR2	6.07383e-48	-1.22403	0.183664	0.246241	0.186166	0.243132	2.553e-49
DPY19L3	7.73121e-48	-1.23968	0.419617	0.501826	0.524318	0.687114	3.25703e-49
PLEKHA5	9.40916e-48	-1.25994	0.705196	0.717836	1.71056	2.22204	3.9819e-49
TRMT13	9.40916e-48	-0.836275	0.239948	0.239213	0.255883	0.251891	3.97476e-49
SUMF1	1.2742e-47	-0.869279	0.790584	0.805387	2.09235	2.13925	5.40451e-49
GFOD2	1.27563e-47	1.31468	0.225942	0.0624632	0.233061	0.0510729	5.42276e-49
AP3M1	1.74235e-47	0.838107	0.449602	0.18633	0.546998	0.167822	7.42347e-49
ARMC2	1.8454e-47	-1.25237	0.261134	0.340819	0.31645	0.419643	7.88013e-49
APPL2	1.90238e-47	-1.63237	0.589561	0.750697	0.907933	1.59822	8.14163e-49
DNAAF11	4.59214e-47	-1.57439	0.167757	0.257666	0.179692	0.29326	1.96969e-48
CRIM1	6.30197e-47	-0.781037	0.499251	0.47772	0.720187	0.692144	2.7091e-48
PPM1B	1.30894e-46	-1.62973	0.452931	0.627851	0.582663	1.00658	5.63941e-48
GUSBP4	1.50257e-46	-1.10997	0.189656	0.226297	0.208458	0.250614	6.488e-48
CHST8	1.8482e-46	-2.16357	0.158316	0.300538	0.170758	0.406478	7.99805e-48
AGK-DT	2.38964e-46	-1.40606	0.12272	0.182443	0.126015	0.185717	1.03639e-47
SYNJ1	3.89443e-46	0.837123	0.583617	0.266931	0.918531	0.280743	1.69274e-47
GOT1-DT	5.67421e-46	-1.14436	0.099679	0.122374	0.0928481	0.114273	2.47176e-47
AC090115.1	7.97066e-46	-2.20032	0.153822	0.32484	0.17671	0.435185	3.47974e-47
CRACR2A	1.06639e-45	-1.3018	0.0868387	0.120961	0.0877943	0.119478	4.66573e-47
F3	1.85898e-45	-1.68222	0.287742	0.338856	0.222836	0.389976	8.15126e-47
IPCEF1	2.05775e-45	-1.55369	0.128712	0.208669	0.147241	0.238938	9.04244e-47
ZDHHC5	2.09375e-45	1.17429	0.459993	0.162656	0.560276	0.132344	9.22065e-47
PCDHGC5	2.20872e-45	5.88259	0.135275	0.002866	0.0799028	0.00078202	9.74806e-47
RBM45	3.9686e-45	-0.817377	0.193342	0.186565	0.189267	0.182788	1.75531e-46
JAG1	5.18934e-45	1.71609	0.656759	0.228495	1.02981	0.171189	2.3002e-46
DOCK11	5.96343e-45	-1.37058	0.322078	0.429194	0.393874	0.566407	2.64902e-46
HACE1	7.13434e-45	-0.757938	0.306979	0.29885	0.358895	0.334365	3.17597e-46
CBL	8.21064e-45	1.12927	0.68389	0.307997	1.27004	0.316969	3.66294e-46
DENR	8.51702e-45	0.602881	0.676638	0.374544	1.19221	0.43501	3.80776e-46
LINC02649	1.02555e-44	-2.79999	0.174414	0.469946	0.209218	0.796603	4.59481e-46
TTC7A	1.35413e-44	-0.876872	0.305481	0.339602	0.370576	0.372178	6.07987e-46
FGF12	1.43205e-44	-1.63075	0.440209	0.623179	0.796511	1.36977	6.4434e-46
CAPN7	1.47823e-44	-0.598095	0.770729	0.733658	1.72137	1.43621	6.66532e-46
AP002433.1	1.99021e-44	1.19842	0.173535	0.0498999	0.174621	0.0412566	8.99282e-46
MFSD6	2.17682e-44	-0.736627	0.36224	0.341761	0.438571	0.406651	9.85682e-46
CASZ1	3.08477e-44	-3.05967	0.0287481	0.123945	0.0259272	0.124676	1.39976e-45
UBE2D2	3.79225e-44	0.719688	0.805707	0.498567	1.86377	0.625255	1.72441e-45
RIC3	5.2035e-44	-0.803728	0.571846	0.578305	0.850983	0.817916	2.3711e-45
RPL41P5	5.37774e-44	-2.36784	0.11416	0.201484	0.145285	0.418006	2.45564e-45
RYR3	5.6595e-44	-3.09906	0.503745	0.859487	1.07039	4.87063	2.5897e-45
TAPBP	7.36505e-44	1.8062	0.622613	0.192101	0.739028	0.116074	3.37717e-45
NAV3	9.60005e-44	-1.50784	0.843158	0.955282	3.75665	5.90761	4.41118e-45
KDM5D	9.9458e-44	-0.578068	0.4258	0.380433	0.52227	0.429188	4.57955e-45
CYP27A1	1.13999e-43	-1.70812	0.0943526	0.148483	0.0729151	0.129503	5.26e-45
ITGB8	1.64008e-43	-1.63631	0.870574	0.947077	2.41303	4.10253	7.58308e-45
PLSCR4	1.82918e-43	-2.93039	0.160124	0.494523	0.177162	0.792347	8.47488e-45
IDI1	2.05892e-43	1.51538	0.526667	0.143536	0.563112	0.108407	9.559e-45
SRA1	2.64515e-43	1.0117	0.495922	0.180519	0.589092	0.159164	1.2306e-44
LINC00938	2.66393e-43	-1.45814	0.221115	0.305759	0.21949	0.335696	1.24188e-44
IQUB	3.05516e-43	-1.30766	0.0878611	0.121393	0.0900317	0.123453	1.42718e-44
EFCAB6	3.13395e-43	-1.20376	0.257306	0.310628	0.315228	0.402118	1.46698e-44
WASHC3	3.56628e-43	-1.06091	0.412864	0.446979	0.512711	0.58579	1.67276e-44
NELL2	4.48482e-43	-2.57634	0.288717	0.63378	0.385121	1.26582	2.10788e-44
SGSM1	5.22533e-43	-1.98969	0.146356	0.290134	0.152375	0.332734	2.46092e-44
XKR9	6.89424e-43	-1.71083	0.0673166	0.114208	0.0690111	0.125621	3.25349e-44
HK1	7.5277e-43	0.752788	0.632077	0.284677	0.862037	0.280653	3.55962e-44
SV2A	7.66129e-43	2.41368	0.4	0.0678811	0.360473	0.0370388	3.63011e-44
WASF3	9.64058e-43	-0.867712	0.450244	0.454085	0.630394	0.63084	4.57716e-44
U91319.1	1.07831e-42	-2.80977	0.34745	0.766362	0.620157	2.37275	5.1299e-44
EFTUD2	1.22767e-42	0.628452	0.36954	0.163009	0.410269	0.146143	5.85218e-44
IRAK1BP1	1.26862e-42	-0.919223	0.366354	0.381728	0.491894	0.52076	6.05953e-44
PCTP	1.55019e-42	-1.15415	0.104934	0.121275	0.0973859	0.118614	7.41924e-44
TTTY10	1.59149e-42	-1.89857	0.123719	0.249617	0.133514	0.286815	7.63211e-44
TXLNA	1.7337e-42	1.4507	0.451195	0.157395	0.513374	0.10323	8.33064e-44
LINC01013	2.01968e-42	-3.06268	0.223683	0.638923	0.318734	1.51408	9.72409e-44
E2F7	2.16046e-42	2.20364	0.20554	0.0363551	0.305992	0.038515	1.04225e-43
GAP43	2.39609e-42	1.9024	0.978647	0.708453	11.4956	1.64434	1.15822e-43
CKAP2	2.75636e-42	1.45708	0.395387	0.1051	0.481087	0.0970219	1.335e-43
NCR3LG1	3.18213e-42	0.908343	0.180383	0.0621491	0.181972	0.0533862	1.54425e-43
DNAH11	3.19167e-42	-2.39811	0.0646772	0.173491	0.0628482	0.18739	1.55193e-43
INHBA-AS1	3.3066e-42	-2.87491	0.0423017	0.154293	0.0423592	0.174616	1.61097e-43
PHKG2	3.41193e-42	1.4409	0.186518	0.0498214	0.136707	0.0276707	1.66555e-43
VWC2L	3.67792e-42	-2.80026	0.23776	0.598053	0.338826	1.35999	1.79891e-43
NR2C1	4.13257e-42	-0.679173	0.569683	0.529818	0.825736	0.72776	2.02523e-43
CELF2-AS2	4.83428e-42	1.49847	0.317346	0.099682	0.356529	0.0694542	2.37373e-43
AL035078.4	4.87237e-42	-4.17858	0.0697896	0.432099	0.0731336	0.725268	2.40174e-43
GABPB1-AS1	4.87237e-42	-0.580148	0.796909	0.780613	2.17072	1.77506	2.39918e-43
LNC-LBCS	6.65136e-42	-1.83342	0.178385	0.255977	0.239362	0.477114	3.28502e-43
GSS	8.40024e-42	0.836447	0.363025	0.140866	0.338574	0.103117	4.15679e-43
STAT1	8.73172e-42	1.01119	0.528023	0.212987	0.720391	0.199571	4.32916e-43
STK17B	9.15001e-42	-2.16819	0.0802996	0.182168	0.0762979	0.190889	4.54529e-43
TXNRD3	1.284e-41	-1.04076	0.260873	0.292843	0.308471	0.346632	6.39054e-43
MSANTD3-TMEFF1	1.31724e-41	1.44004	0.149566	0.0384359	0.157986	0.03155	6.56859e-43
CCDC180	1.41352e-41	-1.46296	0.1051	0.15979	0.102639	0.157628	7.06218e-43
CAPRIN2	1.74152e-41	0.675624	0.823255	0.518079	2.05708	0.701192	8.71757e-43
EFNB2	2.12733e-41	0.914042	0.381001	0.153665	0.468751	0.136637	1.06692e-42
EPHA4	2.28326e-41	-1.91486	0.115658	0.227435	0.123546	0.260975	1.1473e-42
CABLES1	2.72147e-41	-1.63808	0.222756	0.355188	0.257205	0.455253	1.3701e-42
P3H2	2.86569e-41	-1.23587	0.561265	0.615327	1.12672	1.43991	1.44544e-42
ABLIM1	3.21587e-41	-1.51907	0.842016	0.939186	2.51422	3.97119	1.62514e-42
MAOB	3.35798e-41	-2.15248	0.424611	0.63166	0.553275	1.34827	1.70016e-42
CRISPLD1	3.64983e-41	-1.94861	0.137106	0.258097	0.145434	0.312922	1.85141e-42
PCMTD1-DT	4.00288e-41	-0.749773	0.206515	0.195634	0.230776	0.215579	2.03432e-42
OSBPL8	4.18463e-41	0.66127	0.862038	0.56425	2.44543	0.854548	2.13069e-42
LAMB4	4.2127e-41	2.76545	0.213078	0.0321935	0.375645	0.0306392	2.14901e-42
FKBP10	4.47254e-41	1.60948	0.507811	0.149189	0.52358	0.0910141	2.28583e-42
SYNE2	4.56949e-41	-1.644	0.574367	0.782105	1.19986	2.07744	2.33975e-42
BMPER	5.61602e-41	-2.69924	0.206159	0.533784	0.264768	0.933454	2.88098e-42
OGDH	5.72951e-41	1.02879	0.53694	0.230183	0.7345	0.200787	2.94466e-42
LRRC8C-DT	6.81444e-41	-1.61449	0.097206	0.161007	0.0963025	0.166089	3.50877e-42
CRADD	6.84237e-41	-1.20252	0.712805	0.798555	1.78899	2.32584	3.52969e-42
KIAA0040	7.22625e-41	-3.59417	0.0648199	0.309371	0.0578829	0.388518	3.73462e-42
LINC03007	8.123e-41	-4.71406	0.0489121	0.419614	0.0501161	0.732427	4.20583e-42
ZNF33A	9.03961e-41	-0.838754	0.366853	0.376271	0.446491	0.447165	4.68906e-42
ANO2	9.19031e-41	-3.41713	0.0264891	0.136469	0.0249893	0.141012	4.77601e-42
PPP1R18	1.28293e-40	2.54397	0.281227	0.0454635	0.198415	0.0177113	6.67939e-42
WSB1	1.29803e-40	-0.873766	0.910736	0.913352	2.83709	2.83026	6.77039e-42
PNISR-AS1	1.55734e-40	-1.63722	0.121936	0.208433	0.125895	0.221235	8.13782e-42
ZNF804B	1.67539e-40	-3.94892	0.0636072	0.354756	0.101339	0.855856	8.77067e-42
ACTR3	1.78167e-40	0.821726	0.62316	0.292097	0.84467	0.265009	9.34408e-42
RNASEH2B	1.87414e-40	-1.12803	0.3747	0.439912	0.472416	0.579491	9.84692e-42
SSPN	2.08249e-40	-1.5984	0.240423	0.366181	0.226555	0.380679	1.09615e-41
CFAP61	2.71323e-40	-1.65525	0.0740934	0.116328	0.0762356	0.133455	1.43074e-41
SHOC2	3.18388e-40	0.418391	0.784829	0.505791	1.73063	0.714906	1.68197e-41
IKZF2	3.87825e-40	-2.95593	0.122364	0.426014	0.13504	0.615951	2.0525e-41
FBN1	4.34908e-40	-0.695044	0.613078	0.578383	1.13191	1.00698	2.30583e-41
AC124312.1	4.4327e-40	-0.843329	0.692474	0.714185	1.33768	1.33194	2.3544e-41
COL21A1	5.99086e-40	-2.25075	0.0522173	0.138196	0.066772	0.172669	3.18772e-41
PPP1R2	6.12171e-40	1.02677	0.666722	0.274233	1.04471	0.279799	3.2632e-41
LGI4	6.595e-40	-3.05199	0.0310783	0.123945	0.0240999	0.107933	3.52178e-41
FKBP14-AS1	7.12393e-40	-0.77583	0.161598	0.155392	0.167813	0.159042	3.81104e-41
SS18L1	8.46282e-40	0.84345	0.288955	0.11625	0.308614	0.0947582	4.53538e-41
MAMLD1	8.96689e-40	1.19687	0.803305	0.460602	2.89474	0.674865	4.81409e-41
PDZD2	9.70157e-40	-2.65707	0.685032	0.954772	1.62994	5.82779	5.21779e-41
THAP6	1.11179e-39	-0.780783	0.315278	0.310117	0.376668	0.359177	5.99018e-41
IKBIP	1.14408e-39	2.14966	0.670099	0.146991	1.00919	0.122499	6.17508e-41
KDM5B	1.14746e-39	0.587595	0.48653	0.228888	0.651022	0.236718	6.20424e-41
AC010542.3	1.37782e-39	-2.08117	0.0465343	0.107416	0.0428021	0.101013	7.46299e-41
ADAM9	1.70556e-39	1.28843	0.828058	0.40713	1.74244	0.390974	9.25447e-41
SPG7	1.8067e-39	0.51057	0.623303	0.354442	0.936032	0.361276	9.8205e-41
AIG1	1.81639e-39	-0.760521	0.671811	0.640415	1.20541	1.12614	9.89055e-41
ADCY8	2.07011e-39	-3.0846	0.117751	0.400298	0.148206	0.690875	1.12918e-40
SESN1	2.11863e-39	-0.635153	0.582047	0.523458	0.961686	0.834245	1.15767e-40
AL590004.4	2.23022e-39	-2.61641	0.069528	0.184798	0.0607276	0.206636	1.22078e-40
SPESP1	2.44162e-39	-1.17174	0.161907	0.199639	0.167668	0.210122	1.33884e-40
ZNF892	2.6924e-39	-0.595801	0.186209	0.165875	0.206353	0.171412	1.47892e-40
LRRIQ1	2.83879e-39	-1.66675	0.109927	0.178085	0.12734	0.227648	1.56204e-40
AKT3	3.37489e-39	-1.50379	0.823897	0.933611	2.46194	3.87961	1.86025e-40
SCARA3	3.49124e-39	-1.13693	0.271074	0.286875	0.226617	0.274977	1.92772e-40
RAB9B	4.53475e-39	-0.922246	0.212365	0.222567	0.225497	0.23265	2.50824e-40
SLC36A4	4.67504e-39	-0.721953	0.466484	0.460406	0.687744	0.629096	2.5903e-40
LHPP	1.32585e-38	-1.06769	0.243134	0.26328	0.22627	0.264341	7.35878e-40
CCDC3	1.42283e-38	-1.27421	0.155439	0.201209	0.17021	0.22949	7.91064e-40
RTN4	1.47509e-38	0.760723	0.915444	0.613757	2.74425	0.897718	8.21531e-40
INTS10	1.64198e-38	-0.876977	0.539983	0.553296	0.773039	0.776918	9.16047e-40
PDE7A	1.99989e-38	-0.89171	0.44682	0.474383	0.642145	0.662381	1.11763e-39
HECW2	2.15425e-38	-0.828973	0.356081	0.375525	0.498401	0.495601	1.20595e-39
CHD1-DT	2.33923e-38	-1.25903	0.591939	0.700915	1.11645	1.48504	1.31174e-39
BCL9L	2.41041e-38	1.82519	0.144073	0.0360802	0.110319	0.017385	1.35396e-39
HGS	2.65539e-38	0.997898	0.252217	0.0980331	0.208888	0.0572226	1.4941e-39
RORA	3.4065e-38	-1.6468	0.964	0.992776	8.01297	14.2419	1.91998e-39
CHUK	3.62247e-38	0.696959	0.387041	0.168505	0.453507	0.153509	2.04517e-39
KLHL32	3.93492e-38	-3.85289	0.0841279	0.465471	0.0915697	0.80089	2.22533e-39
PCDHB16	4.06415e-38	-1.66298	0.0716205	0.113266	0.0608051	0.104588	2.30229e-39
PDE8B	4.15633e-38	-1.61866	0.110451	0.183032	0.0920618	0.154979	2.35848e-39
PON3	5.17999e-38	-4.61312	0.0329806	0.330494	0.0309002	0.407825	2.9443e-39
ENAH	6.13539e-38	0.56212	0.847319	0.573947	2.51239	0.942789	3.49321e-39
FAM124A	6.33871e-38	-1.7729	0.0907145	0.165365	0.0882753	0.168865	3.61503e-39
GALNT7	7.05004e-38	-0.620584	0.577173	0.508657	0.946463	0.793518	4.02744e-39
CPSF6	7.11858e-38	-0.611816	0.80856	0.784029	1.88839	1.60306	4.0734e-39
TDRKH	8.07503e-38	0.984015	0.138604	0.0438931	0.124949	0.0349954	4.62841e-39
NSF	9.19011e-38	0.973768	0.419118	0.156727	0.482315	0.135806	5.27633e-39
GPC4	9.81596e-38	-2.28648	0.15991	0.282321	0.134476	0.373439	5.64502e-39
TTC12	9.90556e-38	-1.09978	0.179289	0.205332	0.179921	0.214246	5.70601e-39
AC124854.1	1.10309e-37	-5.68161	0.0143621	0.257312	0.0143697	0.443954	6.36481e-39
RABL6	1.2144e-37	0.962702	0.446415	0.182246	0.514742	0.143097	7.01863e-39
SH3YL1	1.3356e-37	-0.960237	0.174486	0.178949	0.173733	0.18861	7.7319e-39
BICRAL	1.43119e-37	-0.972937	0.567566	0.624907	0.924779	1.01391	8.29894e-39
PHF7	1.6186e-37	-1.17298	0.114374	0.136233	0.100375	0.126223	9.40113e-39
MTMR1	1.81767e-37	-1.21714	0.528427	0.624436	0.808201	1.04602	1.05747e-38
NT5C2	1.88468e-37	-0.558075	0.732255	0.674689	1.48179	1.21255	1.09825e-38
UBE2G1	2.08066e-37	0.597146	0.463298	0.221782	0.62028	0.226026	1.21445e-38
CAMTA1	2.52437e-37	-0.662298	0.864606	0.858859	2.87356	2.47823	1.47584e-38
TCTN1	2.83779e-37	-0.891169	0.30969	0.299085	0.30913	0.316676	1.66179e-38
NEDD9	3.26054e-37	-1.60567	0.10384	0.176279	0.0984386	0.16911	1.91247e-38
APH1B	3.40033e-37	-0.810715	0.538248	0.511484	0.70302	0.680223	1.99771e-38
TMTC1	3.56876e-37	-1.21344	0.340792	0.420321	0.498865	0.635238	2.10008e-38
TMOD3	3.68635e-37	0.859775	0.607181	0.278042	0.962829	0.291547	2.17279e-38
EPB41L1	3.96819e-37	-0.591317	0.552348	0.501394	0.845652	0.695998	2.3427e-38
RNF170	4.35996e-37	-0.881422	0.326834	0.336657	0.379215	0.387069	2.57816e-38
LINC02058	4.40159e-37	-6.22297	0.00732374	0.217463	0.00653133	0.292345	2.60698e-38
GRAMD2A	5.32064e-37	-3.43145	0.0421353	0.220368	0.0378532	0.227275	3.1564e-38
ORC3	6.30944e-37	-0.57126	0.500606	0.445094	0.702825	0.581452	3.74902e-38
ZNF197	6.71525e-37	-0.428056	0.414529	0.333831	0.543344	0.402334	3.99656e-38
PALLD	7.66335e-37	-1.09474	0.67212	0.724275	1.28992	1.54843	4.56814e-38
MLYCD	9.87517e-37	-1.4001	0.105933	0.146677	0.0958141	0.140734	5.89605e-38
KLHDC1	1.43423e-36	-1.18047	0.422375	0.516548	0.568036	0.722616	8.57685e-38
LUCAT1	1.56077e-36	2.44704	0.130567	0.0155471	0.155745	0.016364	9.34852e-38
TSPYL2	1.76807e-36	-1.12525	0.63864	0.692827	0.94762	1.12742	1.0607e-37
GALNT7-DT	1.92832e-36	-1.30236	0.0806563	0.110282	0.0786538	0.10712	1.15869e-37
ZNF518A	2.17846e-36	-0.875249	0.542551	0.550351	0.852678	0.874834	1.31107e-37
AC022414.1	2.48048e-36	-2.81104	0.0429438	0.148051	0.0403446	0.164218	1.49521e-37
AL365273.2	2.48885e-36	-0.932075	0.143241	0.156806	0.132139	0.139213	1.50263e-37
CMTM4	2.65054e-36	-0.992452	0.267531	0.296101	0.295293	0.324691	1.60278e-37
AGL	2.65587e-36	-0.716757	0.145405	0.132975	0.138404	0.125026	1.60854e-37
STN1	2.78803e-36	-1.10043	0.130924	0.143575	0.118089	0.140589	1.69125e-37
AC025263.1	4.11401e-36	-2.87494	0.0570206	0.209532	0.0572797	0.240559	2.49953e-37
KYAT1	5.49262e-36	-0.996759	0.269813	0.301676	0.317488	0.353791	3.34238e-37
CC2D2B	5.82575e-36	-1.44182	0.131494	0.20435	0.129424	0.197304	3.55066e-37
MYT1L	5.96768e-36	-2.66696	0.16778	0.45703	0.222442	0.827919	3.64286e-37
ZNF621	6.22476e-36	-0.920753	0.263013	0.27443	0.272403	0.282865	3.80574e-37
MARCHF3	7.20206e-36	-2.14385	0.410272	0.626202	0.712591	1.80632	4.41012e-37
EDNRA	8.52917e-36	-1.50738	0.0823683	0.104079	0.0793802	0.120622	5.23092e-37
CEP126	9.30788e-36	-1.27589	0.288788	0.379098	0.372263	0.509967	5.7174e-37
ECHDC2	9.36063e-36	-1.64187	0.0815361	0.134899	0.0725943	0.125526	5.75874e-37
CFAP91	1.0258e-35	-1.7781	0.0603495	0.109301	0.0590273	0.111166	6.32059e-37
AL662796.1	1.07816e-35	-2.27579	0.333373	0.646814	0.490326	1.33986	6.6535e-37
DPH6-DT	1.07862e-35	-1.76791	0.355701	0.562522	0.636356	1.24145	6.66666e-37
CA12	1.13035e-35	1.90142	0.473	0.113305	0.5148	0.0773324	6.99722e-37
MGST1	1.13489e-35	-1.69938	0.202639	0.267638	0.177643	0.314031	7.03617e-37
AC110023.1	1.17565e-35	-2.46071	0.0960885	0.249225	0.128475	0.409734	7.3001e-37
FAM184A	1.18044e-35	-1.85113	0.424183	0.652585	0.671589	1.34031	7.34113e-37
ANAPC7	1.20753e-35	1.05738	0.476757	0.176711	0.587735	0.151538	7.52114e-37
DBF4	1.25738e-35	0.83854	0.288408	0.110989	0.364769	0.113419	7.8436e-37
ZNF891	1.28087e-35	-0.89343	0.340055	0.353422	0.412996	0.422746	8.00235e-37
CALR	1.5545e-35	7.34799	0.523981	0.00954026	1.00738	0.00323018	9.72678e-37
RPL36AP7	1.62541e-35	1.4691	0.129806	0.0334891	0.117161	0.0236558	1.0186e-36
CLEC16A	1.69364e-35	-0.620904	0.64116	0.588395	1.15484	0.98422	1.06298e-36
CDC14B	1.90304e-35	-1.42432	0.617644	0.763417	1.12509	1.71978	1.19622e-36
FAM210A	1.95101e-35	0.66204	0.304934	0.132347	0.340889	0.117848	1.22823e-36
AC034195.1	2.26833e-35	-1.48972	0.228415	0.313376	0.312529	0.500321	1.43086e-36
ATP6AP1L	2.26833e-35	-1.43191	0.189942	0.269954	0.21194	0.324704	1.43233e-36
PUS7	3.1714e-35	0.927838	0.518036	0.215186	0.803226	0.227562	2.0056e-36
MLH3	3.23314e-35	-0.724096	0.509119	0.487182	0.726391	0.662056	2.04773e-36
RIPK2-DT	3.50596e-35	-0.898274	0.648722	0.656943	1.37299	1.43178	2.22388e-36
AK3	3.51047e-35	-0.7538	0.29597	0.282792	0.32416	0.303137	2.23009e-36
AC027808.1	3.56461e-35	-1.77756	0.108691	0.1985	0.107962	0.206048	2.2679e-36
ANAPC1	3.94691e-35	-0.479038	0.30082	0.246437	0.33737	0.260021	2.5149e-36
DCTN2	4.17389e-35	0.827656	0.760457	0.41349	1.4201	0.437212	2.6635e-36
PRR5L	4.19832e-35	-1.24782	0.194246	0.243532	0.22612	0.290023	2.68311e-36
RP2	4.36569e-35	0.862239	0.251742	0.0972479	0.233325	0.0707278	2.79424e-36
KPNA1	4.72409e-35	0.739314	0.766568	0.440658	1.62874	0.531566	3.02815e-36
PLCXD3	4.87373e-35	-3.64675	0.0294614	0.168976	0.0343139	0.2408	3.12872e-36
NRXN1	5.43728e-35	-1.93485	0.809654	0.953319	3.83696	8.25698	3.49569e-36
CYP7B1	5.72018e-35	-1.58522	0.243063	0.342546	0.298345	0.487435	3.68304e-36
PER2	6.10246e-35	-1.26044	0.199144	0.241844	0.190711	0.25049	3.935e-36
AC012613.1	6.16096e-35	0.924016	0.186922	0.0681952	0.184896	0.0543853	3.97861e-36
NADK	6.50443e-35	0.906892	0.183236	0.0621884	0.143763	0.0422432	4.20663e-36
NCOA1	6.62615e-35	-1.22508	0.836405	0.896274	2.43451	3.16353	4.29168e-36
PLCG1-AS1	8.46465e-35	-1.11693	0.124551	0.135213	0.1118	0.134868	5.49054e-36
TRIM37	8.72421e-35	0.56671	0.551135	0.285344	0.832614	0.311519	5.66724e-36
OFD1	1.00466e-34	-1.09543	0.41888	0.479918	0.524577	0.629076	6.53583e-36
GLT1D1	1.01424e-34	-1.12981	0.0940911	0.112756	0.0957535	0.112892	6.60784e-36
ZNRF3	1.04223e-34	-1.25073	0.542504	0.617212	0.865553	1.12074	6.80016e-36
BCAR3	1.06417e-34	-2.27836	0.0821068	0.195085	0.0786294	0.220219	6.95348e-36
CHEK1	1.11665e-34	2.05484	0.134776	0.0245377	0.140899	0.0189138	7.30706e-36
PPIL6	1.25587e-34	-1.65684	0.0662941	0.110165	0.0631964	0.108597	8.23012e-36
TRIM5	1.3504e-34	0.830894	0.273523	0.117035	0.264631	0.0815372	8.8625e-36
MKRN3	1.48242e-34	-1.00374	0.516371	0.568961	0.833069	0.937656	9.74309e-36
C3orf38	1.6173e-34	-1.24127	0.271739	0.310235	0.276518	0.35536	1.0645e-35
COQ10B	2.06899e-34	1.19285	0.314255	0.0914373	0.303836	0.0718921	1.36378e-35
CP	2.16973e-34	-2.15473	0.0516229	0.101449	0.0421307	0.106302	1.43225e-35
ZSWIM8	2.19182e-34	0.675785	0.406658	0.205724	0.436494	0.149294	1.44893e-35
KCTD6	2.48472e-34	-1.24833	0.114659	0.136979	0.0966786	0.125385	1.64493e-35
EPHB1	2.53103e-34	-1.01887	0.424206	0.482392	0.670127	0.752284	1.678e-35
MAST2	2.90278e-34	0.653368	0.517774	0.260296	0.80398	0.282671	1.92724e-35
LMO3	2.95442e-34	-3.81419	0.0748306	0.440619	0.0766814	0.639416	1.96435e-35
MAOA	2.96449e-34	-2.94391	0.0992272	0.296887	0.0910662	0.370928	1.97387e-35
ATXN7L1	3.07207e-34	0.567478	0.43562	0.22186	0.672933	0.250591	2.04844e-35
NME9	3.16083e-34	-1.50642	0.182903	0.260021	0.185613	0.287912	2.11064e-35
SEZ6L	3.26389e-34	-1.59947	0.595672	0.75639	1.17666	1.96722	2.18258e-35
FAIM	3.57424e-34	-0.826825	0.177006	0.16666	0.161672	0.156185	2.39353e-35
DIAPH1	3.93686e-34	0.73852	0.622542	0.309764	1.01929	0.331932	2.64012e-35
ING2-DT	4.9895e-34	-1.09136	0.0999168	0.119548	0.101968	0.120117	3.3508e-35
ACSL6	6.038e-34	-2.42097	0.0555225	0.148718	0.04498	0.129194	4.06071e-35
NEK11	6.36477e-34	-1.48168	0.317275	0.435005	0.417922	0.643907	4.28655e-35
PCGF5	6.55784e-34	-1.48533	0.651718	0.79616	1.25333	1.96511	4.42285e-35
AKR1E2	6.77862e-34	-1.54222	0.10812	0.17993	0.10963	0.181892	4.57822e-35
CHST3	8.42564e-34	-1.23987	0.644014	0.685682	0.956824	1.23668	5.69865e-35
PLOD3	8.81974e-34	1.5809	0.601355	0.191041	0.722155	0.128025	5.97363e-35
AC078881.1	9.47151e-34	-1.9185	0.0621805	0.116407	0.0636645	0.138083	6.42412e-35
TTPAL	1.07367e-33	0.822745	0.217501	0.0789133	0.200525	0.0618811	7.29252e-35
C1QTNF3-AMACR	1.18993e-33	-0.989625	0.535109	0.580228	0.910225	1.02155	8.09353e-35
CDCA7L	1.24163e-33	-2.28579	0.12039	0.28346	0.115168	0.320981	8.45706e-35
TMEM120B	1.27691e-33	1.24998	0.288099	0.0995642	0.322927	0.075862	8.7095e-35
FBXL4	1.40888e-33	-1.00658	0.451552	0.497311	0.617964	0.697286	9.62312e-35
RBMS3	1.52462e-33	-0.966952	0.194388	0.19587	0.216201	0.23619	1.04282e-34
TBC1D9B	1.5289e-33	0.657513	0.475045	0.239449	0.546229	0.191154	1.04721e-34
MERTK	1.56474e-33	-2.94145	0.133111	0.438616	0.130285	0.579656	1.07325e-34
TMEM220	2.55989e-33	-1.78307	0.0797051	0.141494	0.0713488	0.137545	1.75827e-34
ICA1L	2.66078e-33	-0.802611	0.481631	0.50477	0.750319	0.710834	1.83011e-34
IMMT	2.88246e-33	0.884019	0.56759	0.239724	0.737177	0.218298	1.98534e-34
CEBPD	3.06389e-33	-3.10287	0.215694	0.480586	0.14772	0.660479	2.11323e-34
AC092832.2	3.13229e-33	-1.96968	0.057401	0.116485	0.0576057	0.12359	2.1634e-34
HIP1R	3.13769e-33	-1.40713	0.518749	0.65553	0.722505	1.09547	2.17012e-34
RIPOR2	3.15828e-33	-2.2469	0.128047	0.289741	0.141169	0.378345	2.18738e-34
LINC00648	3.21601e-33	-2.96138	0.0781833	0.304189	0.0804778	0.368285	2.23044e-34
ARAP2	3.52828e-33	-1.84559	0.356771	0.578697	0.488624	0.973436	2.45038e-34
AL354809.1	4.1871e-33	-1.36538	0.0725479	0.105689	0.0666402	0.0924629	2.91193e-34
STXBP5-AS1	4.37336e-33	-1.53048	0.0891689	0.131483	0.100546	0.164603	3.04564e-34
COPA	4.5874e-33	0.588909	0.69868	0.40285	1.22637	0.452726	3.19909e-34
ODF2	4.88913e-33	0.928742	0.447224	0.191551	0.558779	0.165144	3.41417e-34
GALNT15	4.94331e-33	-4.23015	0.0586613	0.337953	0.0520776	0.572969	3.45672e-34
RAB11FIP2	5.38958e-33	-0.483814	0.543407	0.46123	0.816374	0.632503	3.77394e-34
ESRRG	5.50103e-33	-3.18175	0.145785	0.504142	0.19619	1.03359	3.85724e-34
TSPAN12	5.84087e-33	-2.19413	0.0697182	0.129755	0.0530223	0.132728	4.10111e-34
EMILIN2	5.88331e-33	-1.72581	0.112733	0.148797	0.0854316	0.155072	4.13653e-34
CYP51A1	6.06994e-33	2.42485	0.262252	0.0352558	0.241265	0.0238193	4.27354e-34
OSBPL1A	6.18895e-33	-0.934785	0.329331	0.353657	0.406306	0.430722	4.36325e-34
ANO4	6.59578e-33	-1.77533	0.216455	0.368929	0.323368	0.594321	4.65636e-34
TTC33	7.42175e-33	-0.451077	0.404827	0.323976	0.52401	0.394062	5.24656e-34
HNRNPLL	8.45376e-33	0.489597	0.388681	0.199168	0.448296	0.175573	5.98418e-34
TIMM21	8.75667e-33	0.742615	0.334229	0.134781	0.357895	0.117024	6.20696e-34
PCP4	9.7367e-33	-4.18655	0.0326002	0.2484	0.0258517	0.280174	6.91094e-34
CHD8	1.0794e-32	0.531125	0.660635	0.377213	1.05322	0.40206	7.67167e-34
ZBTB25	1.16703e-32	-0.808233	0.296065	0.286679	0.314927	0.308184	8.30568e-34
CSDC2	1.25403e-32	-1.99153	0.0658423	0.111656	0.0447011	0.0985996	8.93679e-34
WBP2NL	1.58157e-32	-1.20551	0.174985	0.222528	0.18515	0.237189	1.12862e-33
ERCC6L2-AS1	1.59294e-32	-1.26268	0.391844	0.481489	0.548774	0.749485	1.139e-33
NUP62	1.59294e-32	1.19267	0.101415	0.0305053	0.0831587	0.0199965	1.13977e-33
SLC16A7	1.75809e-32	-0.870578	0.363833	0.358094	0.445859	0.455354	1.25962e-33
CHPT1	1.81968e-32	-0.914729	0.738295	0.723175	1.31877	1.37543	1.30548e-33
DGKB	1.86657e-32	4.08333	0.175484	0.00985434	0.300379	0.00904125	1.34091e-33
DSEL-AS1	1.98088e-32	-1.42071	0.145215	0.186173	0.207481	0.317529	1.42491e-33
CS	2.00723e-32	0.749815	0.382547	0.162577	0.387463	0.125794	1.44579e-33
P3H2-AS1	2.07126e-32	-2.0679	0.0589228	0.122963	0.0595182	0.137218	1.49389e-33
RBM19	2.12865e-32	-0.520871	0.58005	0.526638	0.909868	0.718237	1.53731e-33
HNRNPAB	2.13947e-32	2.01657	0.649792	0.178163	0.896239	0.119543	1.54717e-33
KBTBD12	2.15547e-32	-2.9934	0.0346689	0.147658	0.0324882	0.154397	1.5608e-33
FAM135B	2.30979e-32	-2.77877	0.152729	0.457422	0.184997	0.720135	1.67475e-33
CSE1L	2.33441e-32	0.600679	0.537677	0.259393	0.679984	0.248223	1.69483e-33
SELENOI	2.38413e-32	0.987965	0.393818	0.1433	0.445817	0.123331	1.73321e-33
CELF5	2.50612e-32	1.01794	0.373463	0.135566	0.468705	0.126864	1.82429e-33
TARBP1	2.53766e-32	-0.78225	0.396576	0.399121	0.531358	0.507497	1.84967e-33
PLSCR1	2.90013e-32	-1.59864	0.299251	0.423933	0.342336	0.581854	2.11664e-33
CRMP1	2.9057e-32	0.638953	0.557722	0.292411	0.784432	0.277939	2.12348e-33
PLAA	3.18395e-32	0.586856	0.397123	0.187939	0.471075	0.172529	2.32987e-33
MB21D2	3.24636e-32	-1.01538	0.153442	0.154175	0.16481	0.184868	2.37864e-33
GRB2	4.48169e-32	1.23733	0.580858	0.220682	0.778598	0.184101	3.28806e-33
SAFB	5.03202e-32	0.459251	0.553989	0.298928	0.697925	0.278541	3.69662e-33
AC004076.1	5.30656e-32	-0.81271	0.148544	0.154372	0.153804	0.149668	3.90338e-33
BASP1-AS1	5.90035e-32	-2.86608	0.163096	0.478819	0.192898	0.798448	4.34579e-33
EPHB2	7.38713e-32	2.81837	0.205612	0.0236347	0.218883	0.0166544	5.4479e-33
AZIN2	7.76563e-32	-1.58768	0.142932	0.249499	0.140343	0.241752	5.73446e-33
INKA2	9.05813e-32	1.1243	0.188158	0.0717679	0.184525	0.0471623	6.69754e-33
PRRC2A	9.64815e-32	0.876596	0.306289	0.131679	0.259013	0.0788682	7.14303e-33
NINL	1.28606e-31	-0.791017	0.367543	0.379255	0.463496	0.447831	9.53367e-33
GPR173	1.3291e-31	0.658781	0.634479	0.356484	1.15272	0.403718	9.8654e-33
LGR5	1.34113e-31	-3.58532	0.0367376	0.212006	0.036265	0.253291	9.96755e-33
AC244517.11	1.44088e-31	-0.826116	0.215123	0.215343	0.206618	0.201085	1.07226e-32
C5orf63	1.631e-31	-1.86926	0.104649	0.20011	0.103643	0.214183	1.2153e-32
TRIM27	1.67005e-31	0.601514	0.529402	0.270347	0.728436	0.263164	1.246e-32
KIAA1328	1.68173e-31	-0.793245	0.641137	0.660869	1.35395	1.32011	1.25631e-32
EED	1.71331e-31	0.545272	0.302057	0.141494	0.319921	0.120428	1.28155e-32
DTNBP1	1.87278e-31	-0.608325	0.354227	0.311884	0.436967	0.369348	1.40261e-32
PURG	1.88493e-31	-0.931637	0.257377	0.270033	0.293257	0.299199	1.41351e-32
VPS13C	2.19796e-31	-0.60229	0.956604	0.936163	4.09203	3.45211	1.65036e-32
AL136317.2	2.58239e-31	-2.76161	0.0415646	0.136901	0.0404031	0.143375	1.94148e-32
CD96	2.68876e-31	-2.07179	0.116514	0.210867	0.158486	0.364694	2.02402e-32
NF2	2.70489e-31	0.904753	0.509927	0.220682	0.705232	0.20883	2.03875e-32
EGFLAM	2.75553e-31	-1.01838	0.114517	0.103412	0.0838554	0.0914801	2.07954e-32
ANGEL2	3.02854e-31	-0.726178	0.308715	0.292804	0.323649	0.294816	2.28847e-32
DLEU7	3.28187e-31	-1.55242	0.105814	0.172274	0.0951935	0.15753	2.48303e-32
LY96	3.41794e-31	2.96211	0.105647	0.00906914	0.0816198	0.00603469	2.58925e-32
STK40	3.42608e-31	1.3872	0.353917	0.102273	0.398184	0.0840947	2.59869e-32
RGCC	3.58749e-31	-3.30405	0.0597789	0.246437	0.0429084	0.236288	2.72455e-32
CDC42EP3	3.60943e-31	1.32133	0.208774	0.0583409	0.227396	0.0499338	2.74465e-32
PCNX4-DT	4.336e-31	-0.883726	0.222613	0.22716	0.297853	0.310496	3.30129e-32
TPK1	5.26645e-31	-1.01119	0.339579	0.377135	0.459427	0.521476	4.01474e-32
ARHGAP36	5.92857e-31	-2.44186	0.0479372	0.134702	0.0284456	0.0830597	4.52515e-32
ZDHHC21	6.01709e-31	-0.895944	0.614243	0.640689	1.01262	1.03662	4.59846e-32
C6orf118	6.10477e-31	-2.86199	0.0357389	0.12846	0.0318283	0.12755	4.67131e-32
SORBS2	6.15615e-31	-1.88034	0.27464	0.493031	0.367862	0.785018	4.7165e-32
AP003059.2	6.16776e-31	-2.2541	0.104625	0.261317	0.111681	0.308521	4.73129e-32
PFDN1	6.175e-31	0.756282	0.672524	0.340387	1.14687	0.369576	4.74274e-32
TNFRSF10B	6.36539e-31	0.851614	0.575936	0.267167	0.838518	0.254662	4.89505e-32
EPHX2	7.43312e-31	-1.20909	0.127714	0.166503	0.121169	0.157619	5.72325e-32
TANGO2	7.93916e-31	1.11686	0.182499	0.0566919	0.165275	0.0417312	6.12046e-32
CYTOR	8.22354e-31	0.66792	0.670955	0.364022	1.34067	0.472176	6.34755e-32
CLIP4	8.56455e-31	-0.605071	0.46482	0.419379	0.63195	0.528831	6.61895e-32
CFAP69	9.73053e-31	-1.87713	0.126025	0.22983	0.1319	0.263112	7.52935e-32
STARD3NL	1.04201e-30	0.715871	0.536512	0.239292	0.652047	0.215914	8.07291e-32
SGCZ	1.07024e-30	-2.59992	0.0958269	0.245887	0.169831	0.609029	8.30179e-32
U2SURP	1.09544e-30	-0.583585	0.675877	0.606926	1.10877	0.920296	8.50777e-32
CCNB1	1.4811e-30	2.19206	0.192438	0.0260296	0.158672	0.0180134	1.15171e-31
TRAK2	1.76715e-30	0.644093	0.45148	0.225197	0.633411	0.223808	1.37584e-31
MAP3K4	1.86079e-30	0.86032	0.864511	0.578815	3.04879	0.914146	1.45052e-31
ARHGEF4	1.97391e-30	-2.33257	0.148211	0.342978	0.15296	0.420152	1.54058e-31
ENTPD3-AS1	2.05016e-30	-2.09772	0.157128	0.322053	0.163404	0.399425	1.60205e-31
FBXL13	2.05669e-30	-1.3705	0.264249	0.349142	0.316123	0.439293	1.60912e-31
HBEGF	2.20606e-30	2.98583	0.490667	0.0668604	0.566463	0.0369318	1.7281e-31
SNORA70	2.40566e-30	1.36912	0.16866	0.0455027	0.169883	0.0367477	1.88675e-31
CNTRL	2.42224e-30	-1.00845	0.322078	0.372463	0.410049	0.460584	1.90207e-31
GSG1L	2.66277e-30	-2.92966	0.121674	0.394213	0.126268	0.53501	2.09349e-31
TPM1	2.80039e-30	-1.19405	0.6506	0.712457	1.0483	1.32688	2.20436e-31
AC007402.1	3.21439e-30	-3.59808	0.0214719	0.101881	0.0239675	0.169593	2.53331e-31
UGGT1	3.86507e-30	0.487731	0.393104	0.198971	0.415963	0.163697	3.04981e-31
NRP1	4.82881e-30	2.70552	0.480157	0.0954811	1.02528	0.0872806	3.81489e-31
GDF11	4.89405e-30	1.14364	0.394222	0.139453	0.39675	0.100032	3.8711e-31
DHX34	5.09165e-30	0.843663	0.207704	0.0776962	0.218557	0.0664019	4.03227e-31
ZNF630	5.32825e-30	-1.43871	0.1202	0.169291	0.117977	0.177442	4.22473e-31
PYGL	7.53729e-30	-1.16997	0.315373	0.384202	0.395505	0.498298	5.98346e-31
KLHL12	9.13611e-30	0.818378	0.203805	0.0784421	0.193692	0.0608862	7.26141e-31
TPCN1	9.74278e-30	-1.80825	0.354869	0.554042	0.406481	0.820288	7.7529e-31
ZHX3	1.09637e-29	-1.22027	0.80944	0.869577	2.2252	2.88464	8.73491e-31
RGS7	1.12982e-29	-1.39733	0.704268	0.852028	1.99172	2.85794	9.01223e-31
ZNF248	1.24965e-29	-1.05649	0.600808	0.664089	1.04158	1.2173	9.98005e-31
LRRTM4	1.388e-29	-2.24673	0.733207	0.947391	3.70188	9.41133	1.10982e-30
RGS6	1.5232e-29	3.45281	0.755844	0.135801	7.37196	0.363934	1.21938e-30
AHI1-DT	1.6401e-29	-2.09251	0.19018	0.389659	0.230758	0.571942	1.31452e-30
BTBD1	1.65666e-29	0.636257	0.612507	0.324526	0.898887	0.317242	1.32994e-30
UBQLN1	1.65666e-29	0.442136	0.602045	0.330022	0.903091	0.36246	1.33096e-30
SNRNP70	1.87757e-29	-0.689069	0.566401	0.520199	0.681135	0.601917	1.51023e-30
SUN1	2.36052e-29	-0.735322	0.647509	0.613089	1.0068	0.918526	1.90096e-30
SLC9B2	2.45471e-29	-0.844663	0.203805	0.204782	0.222291	0.222435	1.97915e-30
LMCD1-AS1	2.65278e-29	-1.94429	0.674403	0.884025	1.77482	3.97696	2.14138e-30
PACRGL	2.7697e-29	-0.870511	0.251314	0.256684	0.278752	0.284785	2.23841e-30
RPS6KA5	2.94492e-29	-1.83921	0.164594	0.306231	0.187432	0.378222	2.38283e-30
INPP4B	2.95933e-29	-1.38888	0.415718	0.54831	0.687359	1.03057	2.39732e-30
UPP2	3.07895e-29	-2.57135	0.202521	0.49735	0.253809	0.840831	2.49716e-30
ZSCAN2-AS1	3.31517e-29	-1.45081	0.0855071	0.12367	0.076198	0.115606	2.69191e-30
SCFD1	3.36562e-29	0.37186	0.871335	0.647167	2.51356	1.07912	2.73609e-30
GLCCI1	3.55832e-29	-0.745424	0.54103	0.525657	0.969331	0.911168	2.89737e-30
TAF13	3.55832e-29	2.02597	0.239971	0.0383181	0.210659	0.0279081	2.89955e-30
LRRC27	3.6025e-29	-0.730986	0.186423	0.16933	0.179232	0.166899	2.93899e-30
MPPE1	4.91491e-29	-0.603537	0.232814	0.191551	0.212414	0.177553	4.01437e-30
AC239809.3	5.17537e-29	-1.42032	0.100701	0.149268	0.0982507	0.146833	4.23206e-30
MAP3K14	5.23979e-29	-1.37541	0.206634	0.288485	0.221932	0.32571	4.28974e-30
MAP2K3	5.34648e-29	2.32117	0.185781	0.0314475	0.154615	0.0172248	4.3822e-30
SNX10-AS1	5.44127e-29	-2.74497	0.0324813	0.110322	0.0242822	0.0947042	4.46508e-30
FAM118B	5.54437e-29	1.34786	0.243824	0.0697264	0.242558	0.052237	4.55498e-30
EFEMP1	5.69888e-29	-1.97589	0.0583522	0.114954	0.0524517	0.112002	4.68737e-30
SHOC1	6.2619e-29	0.647599	0.467911	0.247497	0.675968	0.238508	5.15643e-30
PCDH9	6.352e-29	-1.52444	0.991559	0.997723	22.4232	36.1398	5.2367e-30
AQP4-AS1	6.4397e-29	-4.08511	0.0656283	0.435986	0.0726004	0.691565	5.31515e-30
SLC19A2	7.82943e-29	-1.17398	0.108073	0.13427	0.104293	0.127452	6.46968e-30
MTR	8.04799e-29	-0.863962	0.414148	0.419026	0.539235	0.541926	6.65797e-30
LRRC28	8.09461e-29	-0.633422	0.508477	0.46924	0.79241	0.685374	6.70427e-30
TMEM62	8.24433e-29	-0.760086	0.304435	0.30466	0.356054	0.334955	6.83615e-30
HNRNPC	9.20078e-29	0.731703	0.932541	0.684936	3.24706	1.06912	7.63801e-30
SNX4	9.52864e-29	0.3899	0.581477	0.32857	0.869126	0.363338	7.91929e-30
KLC2	9.99617e-29	1.23718	0.212698	0.0643477	0.192716	0.0447054	8.31741e-30
FAM221A	1.01751e-28	-1.23834	0.186446	0.229437	0.164177	0.213972	8.47605e-30
MROH8	1.03348e-28	-0.66706	0.199834	0.166307	0.191513	0.1681	8.61892e-30
DHDDS	1.18767e-28	1.18832	0.315373	0.100153	0.328619	0.0803567	9.91619e-30
PRPF40B	1.32679e-28	-0.561657	0.495708	0.441208	0.69584	0.567352	1.10904e-29
SEPTIN11	1.344e-28	0.574936	0.591059	0.309921	0.959261	0.352875	1.12471e-29
C16orf87	1.34414e-28	0.736034	0.282226	0.113502	0.313928	0.101581	1.12611e-29
RAB23	1.50164e-28	1.88914	0.135632	0.0260689	0.126428	0.0187735	1.2595e-29
ZFP2	1.66649e-28	-1.17997	0.177957	0.219583	0.183132	0.228071	1.39935e-29
MAPK8IP3	1.86924e-28	0.723923	0.565117	0.301245	0.790924	0.262703	1.57139e-29
OARD1	1.93546e-28	-1.67785	0.152419	0.235326	0.140507	0.250493	1.6289e-29
CEP41	1.95208e-28	-0.865913	0.195839	0.18472	0.17223	0.171957	1.64476e-29
ERMP1	2.02327e-28	-0.543871	0.217572	0.170115	0.201993	0.161545	1.70667e-29
DPYSL5	2.07062e-28	-1.04625	0.238592	0.264261	0.27037	0.306134	1.74859e-29
RMI1	2.09475e-28	-1.51801	0.0918321	0.145145	0.0897588	0.143203	1.77097e-29
PTEN	2.18104e-28	0.619569	0.880609	0.616701	2.60443	0.941879	1.84601e-29
EEF2	2.25261e-28	7.15816	0.490738	0.00753798	0.621238	0.00260797	1.90874e-29
SETX	2.53355e-28	0.454865	0.721484	0.464293	1.34923	0.541871	2.14921e-29
BBS9	2.81483e-28	-1.0563	0.690643	0.772722	1.57621	1.85702	2.3905e-29
FOCAD	2.94333e-28	-0.648612	0.800262	0.786345	2.19674	1.91476	2.50245e-29
SLC35B3	3.18634e-28	-0.589765	0.388467	0.332731	0.467453	0.384691	2.7121e-29
LRRCC1	3.24169e-28	-1.2928	0.143122	0.198893	0.146583	0.203165	2.76231e-29
IMMP2L	3.45236e-28	-1.56305	0.862608	0.947116	4.032	6.53297	2.94513e-29
SLC8A1-AS1	3.80169e-28	-2.1242	0.0674355	0.172903	0.0663825	0.167382	3.24676e-29
DLL1	4.39659e-28	-1.75315	0.0941148	0.162224	0.074167	0.138674	3.75902e-29
GFOD1	4.94513e-28	-0.579284	0.447509	0.396294	0.644052	0.531902	4.23274e-29
ARHGEF3	5.65186e-28	-1.43249	0.733967	0.833732	1.84931	2.84217	4.84306e-29
NEDD4	5.73225e-28	0.584495	0.742979	0.451101	1.77576	0.6592	4.91743e-29
LINC02008	6.76493e-28	-4.01585	0.0199025	0.123827	0.0218632	0.200257	5.80977e-29
ZNFX1	7.94905e-28	0.622932	0.384996	0.171685	0.404963	0.144244	6.8343e-29
MAP7	8.44473e-28	-2.42419	0.374224	0.72879	0.543004	1.64817	7.26853e-29
SCG2	9.70782e-28	4.4269	0.848365	0.128735	3.05216	0.0753987	8.36497e-29
PEX5L	1.1242e-27	-1.17524	0.290168	0.349338	0.479792	0.585124	9.6977e-29
SRRT	1.2142e-27	0.89011	0.511116	0.227121	0.605445	0.177535	1.04856e-28
ASPH	1.60573e-27	-0.900213	0.66734	0.680146	1.10816	1.1599	1.38822e-28
GRK3	1.72843e-27	-1.14201	0.206016	0.253347	0.221063	0.274278	1.49595e-28
CBX3	1.84024e-27	0.784142	0.777387	0.422952	1.3576	0.431849	1.59447e-28
AC010997.3	2.09879e-27	-3.24286	0.0299845	0.131875	0.0301229	0.149304	1.8205e-28
ACOT11	2.18285e-27	-2.01812	0.094852	0.20329	0.0938611	0.214304	1.8955e-28
MPPED2	2.24923e-27	-1.95077	0.272881	0.46602	0.371624	0.783769	1.95529e-28
CCNY-AS1	2.66522e-27	-0.686304	0.241208	0.225237	0.26754	0.23604	2.31947e-28
HDAC2-AS2	2.78394e-27	-1.83967	0.148615	0.245887	0.176986	0.334193	2.42545e-28
CCDC171	3.06361e-27	-1.31783	0.378599	0.500766	0.5784	0.825267	2.67202e-28
FAT1	3.12181e-27	1.99883	0.799001	0.294884	1.83877	0.24889	2.72577e-28
GDNF-AS1	3.16175e-27	-2.06813	0.321674	0.55255	0.410007	0.938399	2.76366e-28
ARPC5L	3.43028e-27	2.25287	0.430627	0.0793844	0.392023	0.0439189	3.00166e-28
ATXN2L	3.49674e-27	0.64624	0.454453	0.21283	0.574162	0.20145	3.06316e-28
PRKACA	3.80062e-27	1.75802	0.238711	0.0635625	0.203472	0.0321699	3.33298e-28
SNX9	3.89244e-27	-0.592705	0.647771	0.601154	1.18004	0.98893	3.41723e-28
AC092958.1	4.58984e-27	-3.61109	0.0170253	0.112402	0.0163976	0.117398	4.03387e-28
AASDH	5.22915e-27	-0.90525	0.261063	0.265282	0.276326	0.290533	4.60073e-28
SLC27A4	5.24148e-27	1.90278	0.151326	0.0355699	0.120022	0.0175288	4.61659e-28
FAXC	5.65824e-27	-0.785684	0.202164	0.196105	0.223471	0.211068	4.98907e-28
ZNF782	5.67963e-27	-0.799953	0.302842	0.305642	0.373184	0.361208	5.01336e-28
ATP13A3	5.99621e-27	0.323097	0.668838	0.419811	1.12221	0.493114	5.29852e-28
IGFBP3	6.4074e-27	5.2606	0.514255	0.0215147	0.72626	0.00889477	5.66799e-28
ZNF19	7.27568e-27	-0.800691	0.107859	0.108555	0.112102	0.108716	6.44302e-28
TRDMT1	8.34846e-27	-1.04039	0.325479	0.367634	0.392754	0.452493	7.40101e-28
CASC2	9.07208e-27	-1.2096	0.221805	0.266067	0.284293	0.374854	8.05117e-28
SFXN3	9.4711e-27	1.39097	0.269837	0.0786777	0.232645	0.0491994	8.41433e-28
ZNF675	1.0106e-26	1.12222	0.253192	0.0822111	0.281635	0.0708656	8.98806e-28
AK8	1.06807e-26	-2.09512	0.0445607	0.100389	0.0410066	0.0976675	9.50937e-28
GMNN	1.11057e-26	-0.933399	0.124599	0.115504	0.106094	0.112326	9.89835e-28
ANAPC4	1.16018e-26	-0.697964	0.315135	0.292961	0.348834	0.312953	1.03516e-27
RTN4IP1	1.29556e-26	-0.899924	0.125859	0.125044	0.118997	0.12375	1.15719e-27
GRIK3	1.33499e-26	-2.45878	0.251171	0.564838	0.305846	0.940172	1.19369e-27
MIR22HG	1.39105e-26	1.72418	0.118202	0.0218287	0.0964772	0.0161593	1.24514e-27
BRMS1L	1.40416e-26	0.560642	0.410986	0.1985	0.527105	0.196145	1.25822e-27
PABIR2	1.40748e-26	0.782365	0.279087	0.114326	0.269073	0.0865178	1.26254e-27
C2CD5	1.55733e-26	-1.06307	0.535775	0.61411	0.812798	0.956904	1.39844e-27
SULT4A1	1.57874e-26	-0.967816	0.128903	0.138079	0.105341	0.112995	1.41918e-27
N4BP2L2	1.64679e-26	-0.473819	0.925265	0.902438	3.83302	2.95272	1.48193e-27
KIF3B	1.90268e-26	0.603755	0.443467	0.218327	0.56122	0.201417	1.71401e-27
NCKAP5	1.91712e-26	-1.64399	0.660682	0.87794	1.78085	3.20633	1.72885e-27
HELQ	2.14587e-26	-0.584195	0.150898	0.135566	0.15276	0.126348	1.93719e-27
PPP1R3F	2.27316e-26	-1.0895	0.155796	0.159122	0.120984	0.140158	2.05427e-27
MYO1B	2.39205e-26	3.63717	0.173963	0.0120922	0.190585	0.00829031	2.164e-27
HIBADH	2.4029e-26	-0.418254	0.619855	0.517883	1.10447	0.821117	2.1761e-27
ZNF350-AS1	2.49938e-26	-1.15538	0.133944	0.166817	0.134852	0.165117	2.26587e-27
CMSS1	2.67686e-26	-0.30339	0.762145	0.642652	1.97129	1.33823	2.42933e-27
CHORDC1	2.82008e-26	0.517264	0.495922	0.247301	0.641791	0.248036	2.56199e-27
FBN3	2.93154e-26	-4.69234	0.0132921	0.161753	0.0108821	0.165489	2.66605e-27
KPNA4	3.38459e-26	0.468301	0.646748	0.371128	1.09306	0.430141	3.08131e-27
WNK1	3.54134e-26	0.299874	0.923576	0.761376	3.25445	1.46428	3.22739e-27
ZNF682	3.68787e-26	0.774603	0.18968	0.0751835	0.194476	0.0625997	3.36446e-27
DHX30	4.14456e-26	0.548229	0.44896	0.2261	0.492779	0.183941	3.78506e-27
SLC46A3	4.25826e-26	-0.970726	0.129117	0.140002	0.127381	0.13728	3.89297e-27
FAM135A	4.37269e-26	-1.16363	0.695542	0.771662	1.42089	1.76178	4.00176e-27
PRKDC	4.44729e-26	0.505126	0.925288	0.698167	2.91083	1.12953	4.07428e-27
NEMP2-DT	4.46043e-26	-1.13149	0.0953513	0.123356	0.0972887	0.117755	4.09057e-27
DENND2A	4.84811e-26	-0.653445	0.689454	0.667622	1.46109	1.26852	4.45074e-27
PLPPR5	5.27894e-26	0.840962	0.459565	0.185858	0.663387	0.203176	4.8513e-27
DGKE	5.50638e-26	-0.673847	0.125859	0.108908	0.12198	0.106582	5.06558e-27
NRSN1	6.11032e-26	-4.56029	0.0300559	0.303679	0.0285256	0.382307	5.62701e-27
GPSM2	6.69283e-26	-0.887654	0.431625	0.436143	0.536198	0.550857	6.16984e-27
VPS13A	6.72899e-26	-0.573677	0.578053	0.531389	0.947848	0.777909	6.2096e-27
DNMT1	7.58992e-26	1.12318	0.405421	0.146991	0.462155	0.119051	7.01133e-27
SLC25A17	7.6909e-26	0.804352	0.378909	0.146284	0.449104	0.141255	7.11195e-27
BTBD3	8.19508e-26	-0.807332	0.329806	0.318558	0.39155	0.372186	7.58601e-27
TMC2	8.87479e-26	-2.60033	0.040019	0.131012	0.0362755	0.124915	8.22367e-27
RFX3-DT	9.30375e-26	-2.19878	0.453264	0.772722	0.75349	1.98304	8.63006e-27
PRKN	9.36805e-26	-1.13467	0.816336	0.894547	2.78393	3.46348	8.69864e-27
CENPC	1.02924e-25	-0.899283	0.425704	0.473244	0.595827	0.627341	9.56677e-27
CCNG1	1.11141e-25	0.91073	0.528926	0.224216	0.689884	0.201626	1.03412e-26
PCDH7	1.20388e-25	-1.1474	0.597765	0.711044	1.63795	1.99247	1.12131e-26
AC007262.2	1.24835e-25	-2.00725	0.142623	0.291704	0.168013	0.39029	1.16391e-26
USP28	1.53023e-25	-0.66003	0.266865	0.246948	0.295966	0.255237	1.42819e-26
MCTP1	1.54415e-25	1.5139	0.220973	0.0703938	0.296457	0.0574742	1.44266e-26
BAZ2B	1.79604e-25	-1.03679	0.590346	0.677712	1.05527	1.22894	1.67971e-26
CRYL1	1.79912e-25	-0.834061	0.397051	0.398964	0.478599	0.471513	1.68432e-26
BTD	1.83502e-25	-1.58759	0.100012	0.140238	0.0749131	0.124847	1.71967e-26
NUP98	1.83979e-25	0.709198	0.659398	0.362608	1.13038	0.380236	1.7259e-26
MAP3K7CL	1.8955e-25	-1.74268	0.0731661	0.128578	0.0630367	0.115627	1.77998e-26
AC113414.1	1.89667e-25	-1.72438	0.0953038	0.159986	0.117803	0.222126	1.78288e-26
KLHL13	1.92439e-25	-0.723477	0.305552	0.286561	0.451777	0.407973	1.81078e-26
MAP2K1	1.96387e-25	0.700581	0.528094	0.262298	0.785105	0.265547	1.8498e-26
ERI2	2.08803e-25	-0.833657	0.182856	0.182561	0.187584	0.184544	1.96875e-26
RNFT1	2.0954e-25	0.96054	0.196362	0.0662322	0.194853	0.0549216	1.97769e-26
FOXO3	2.10821e-25	-1.97005	0.682796	0.893447	1.49151	3.39389	1.99181e-26
SPINDOC	2.37358e-25	1.33586	0.184092	0.0517451	0.158423	0.034495	2.24479e-26
PLS3	2.42495e-25	0.891503	0.47961	0.184367	0.658561	0.190576	2.29569e-26
SHPRH	2.45473e-25	-0.606971	0.753727	0.726316	1.6858	1.42718	2.32623e-26
CADM1	2.52369e-25	-1.29735	0.826204	0.901417	2.42825	3.39298	2.39399e-26
ZFAND4	2.58565e-25	-0.76836	0.264035	0.257744	0.29615	0.28159	2.45524e-26
ASB18	2.63916e-25	-1.98867	0.130353	0.281497	0.135955	0.286602	2.50856e-26
CEMIP2	2.66791e-25	1.51697	0.261943	0.0697264	0.307152	0.0585625	2.53844e-26
LRATD1	2.69769e-25	-1.15541	0.136631	0.153508	0.11301	0.134669	2.56935e-26
MACROH2A1	2.73581e-25	0.509086	0.712971	0.426367	1.22136	0.471865	2.60827e-26
IGIP	2.80941e-25	-1.38913	0.0918559	0.141102	0.0876819	0.125343	2.68112e-26
OSBPL9	2.91887e-25	-0.770805	0.55047	0.538181	0.83803	0.802873	2.78838e-26
SCD	2.94922e-25	3.57233	0.690287	0.144831	2.29904	0.105369	2.82018e-26
ZBTB43	3.10599e-25	0.765059	0.4	0.172	0.480781	0.154239	2.97306e-26
PLN	3.28639e-25	1.92124	0.119058	0.023674	0.114715	0.016133	3.14888e-26
BMP2K	3.36126e-25	-0.938444	0.430246	0.44003	0.614103	0.649844	3.22383e-26
FAM66A	3.91958e-25	-1.1981	0.16369	0.202583	0.16587	0.210989	3.76307e-26
IL20RB	4.11194e-25	1.50828	0.116776	0.0279926	0.116646	0.0226916	3.95167e-26
TOX2	4.37271e-25	-0.628471	0.396861	0.376075	0.569787	0.488718	4.20646e-26
KY	4.52438e-25	-1.78027	0.0866009	0.157198	0.0778252	0.153007	4.35668e-26
LRP4	4.526e-25	-3.10726	0.223802	0.647207	0.215479	1.08189	4.36256e-26
EFCAB2	5.01008e-25	-0.659134	0.380668	0.359625	0.520221	0.455675	4.83395e-26
LSM12	5.12325e-25	1.03887	0.231316	0.0773036	0.216522	0.0586123	4.94804e-26
TENM4	5.42194e-25	-1.84374	0.862704	0.955754	3.35609	6.76857	5.24169e-26
ZNF440	5.47325e-25	1.02708	0.17898	0.0608143	0.18387	0.0500064	5.29653e-26
BICD2	5.66381e-25	0.812432	0.21246	0.087472	0.179186	0.0568004	5.48635e-26
KCNIP3	5.98768e-25	-1.07887	0.10919	0.132661	0.100671	0.11903	5.80579e-26
FAM118A	6.2201e-25	0.865749	0.211176	0.0804052	0.202635	0.0617057	6.04303e-26
RANBP3L	6.2201e-25	-3.36603	0.0379027	0.163716	0.0355095	0.20581	6.03979e-26
FAM3C	6.38889e-25	0.947272	0.81548	0.427192	1.60226	0.447752	6.21312e-26
RPS6KA2	6.39208e-25	-1.484	0.777839	0.9013	2.15563	3.36971	6.22233e-26
RORA-AS1	6.60596e-25	-1.03195	0.372607	0.415492	0.466994	0.533338	6.43683e-26
IGSF21	6.62802e-25	-2.19675	0.137796	0.301205	0.121865	0.302163	6.46467e-26
FOXP1	6.67385e-25	-1.83164	0.755701	0.938283	1.92359	3.97747	6.51574e-26
ANKRD17-DT	6.67831e-25	-1.07352	0.394697	0.465745	0.558212	0.669378	6.52647e-26
EFHC2	6.90674e-25	-2.23063	0.0453929	0.104982	0.0437107	0.110606	6.75631e-26
SH3GL1	6.95461e-25	1.10695	0.231411	0.0777355	0.208294	0.0525619	6.80978e-26
CDCA4	7.04762e-25	2.19144	0.171395	0.031212	0.180403	0.0218926	6.90758e-26
DMAC2L	7.19412e-25	-0.671389	0.394032	0.350084	0.430849	0.376418	7.05804e-26
LARP4	8.1114e-25	0.288966	0.691737	0.433434	1.20891	0.543673	7.96572e-26
ROBO2P1	8.33374e-25	-5.08167	0.00768042	0.123592	0.0072219	0.13939	8.19203e-26
TMEM117	8.73722e-25	-0.522083	0.634312	0.604295	1.41884	1.14054	8.597e-26
CERS5	9.79598e-25	0.648327	0.685246	0.386754	1.15798	0.400842	9.64812e-26
PTPRM	1.01394e-24	-0.786634	0.594436	0.581524	1.15161	1.0827	9.99602e-26
RNF145	1.05057e-24	0.622922	0.847176	0.534294	1.82789	0.657539	1.03672e-25
JPH4	1.06484e-24	0.965632	0.571299	0.258333	0.873324	0.241617	1.05182e-25
NECTIN1	1.107e-24	1.06971	0.125003	0.0407522	0.106209	0.0279456	1.09452e-25
DYNC2H1	1.14613e-24	-0.876893	0.631673	0.652664	1.19326	1.21729	1.13431e-25
MTMR10	1.17344e-24	-1.10678	0.320984	0.37368	0.347604	0.42174	1.16245e-25
KMT5A	1.31897e-24	0.507958	0.425823	0.208472	0.484527	0.188106	1.30788e-25
CHDH	1.32875e-24	-1.34651	0.131494	0.186604	0.113838	0.160879	1.31885e-25
SLC9A9	1.34406e-24	-2.69599	0.343312	0.777119	0.539685	2.10322	1.33533e-25
GFM1	1.37133e-24	0.56378	0.52964	0.267284	0.684121	0.252354	1.36373e-25
RAB2A	1.41693e-24	0.619303	0.880894	0.605983	2.35096	0.856199	1.41043e-25
CLDN11	1.47947e-24	-3.64194	0.0208299	0.118291	0.0128276	0.0858754	1.4741e-25
C1orf198	1.52467e-24	-1.34799	0.209654	0.261709	0.179914	0.250426	1.52059e-25
MIR99AHG	1.5277e-24	-1.75264	0.916538	0.978132	5.82312	11.3994	1.52508e-25
MYO6	1.52974e-24	-0.854914	0.810177	0.818735	1.98342	1.96925	1.52857e-25
SSH2	1.57987e-24	0.603034	0.761241	0.511719	1.91832	0.704706	1.58017e-25
DAGLB	1.60631e-24	1.45031	0.246106	0.0765969	0.225879	0.045215	1.60815e-25
MCCC1	1.66725e-24	-0.556076	0.509333	0.45648	0.710437	0.57853	1.67075e-25
THY1	1.76145e-24	2.19763	0.717204	0.282596	1.58216	0.185588	1.76684e-25
MIOS-DT	2.07796e-24	-2.06018	0.061372	0.13058	0.0480022	0.113828	2.0863e-25
TMEM202-AS1	2.10284e-24	-1.7682	0.0962549	0.181697	0.0948595	0.182908	2.11328e-25
PHEX	2.11991e-24	-0.872381	0.267079	0.293824	0.344496	0.347264	2.13246e-25
HMBOX1	2.13234e-24	-0.673302	0.645274	0.60932	1.14196	1.0168	2.14701e-25
LRP4-AS1	2.41165e-24	-2.83651	0.0701225	0.253229	0.061871	0.255242	2.43054e-25
CNPY2-AS1	2.49105e-24	1.18149	0.190037	0.0660751	0.173267	0.041977	2.51295e-25
GATAD1	2.52333e-24	-0.793929	0.571062	0.555377	0.816879	0.773944	2.54792e-25
UBE2K	2.58981e-24	0.514608	0.654809	0.401319	1.15122	0.449103	2.61752e-25
WDR12	2.80126e-24	0.742217	0.296992	0.129716	0.318807	0.103762	2.83391e-25
PCDHGC3	3.16207e-24	2.0594	0.859589	0.374936	2.27651	0.280357	3.20194e-25
TMEM233	3.25477e-24	2.63044	0.144691	0.0164501	0.193432	0.0166499	3.29892e-25
NRG3	3.36696e-24	-1.71024	0.731899	0.842252	3.6818	6.37377	3.41585e-25
AC008467.1	3.39196e-24	1.61368	0.344953	0.0935574	0.540267	0.0961481	3.44445e-25
CAMK2G	3.46597e-24	-0.803595	0.415242	0.424247	0.525252	0.512655	3.52292e-25
AP5Z1	3.4721e-24	1.30261	0.276971	0.0846453	0.258235	0.0575648	3.53247e-25
TFRC	3.59727e-24	1.20166	0.351397	0.120883	0.378663	0.0915546	3.66325e-25
TMEM87B	3.81649e-24	0.795868	0.461491	0.217738	0.640297	0.205744	3.89014e-25
MROH9	4.05849e-24	-4.52422	0.0155035	0.170822	0.0147078	0.17474	4.14068e-25
LINC00402	4.08637e-24	-5.55847	0.00651528	0.176554	0.00516416	0.138842	4.17303e-25
VCP	4.11261e-24	1.42262	0.752943	0.309057	1.21442	0.246049	4.20376e-25
CRAT	4.27509e-24	1.63249	0.169825	0.0415374	0.119716	0.0212354	4.37393e-25
MFSD14B	4.47873e-24	0.62358	0.368066	0.173413	0.409186	0.14673	4.58655e-25
NMNAT1	4.63056e-24	1.01864	0.170325	0.0553963	0.16869	0.0457454	4.74646e-25
SENP8	4.72134e-24	-0.647421	0.166639	0.152683	0.175118	0.152131	4.84402e-25
ANKAR	4.79442e-24	-1.17533	0.366021	0.453692	0.495693	0.618177	4.92357e-25
C5	4.98917e-24	-1.93884	0.0772322	0.160496	0.0765286	0.166267	5.12834e-25
GRAMD1B	5.32517e-24	-1.52919	0.256997	0.372149	0.287808	0.471521	5.4788e-25
BCL2L11	5.59278e-24	-3.46911	0.0639163	0.270818	0.0529006	0.329356	5.75947e-25
ZNF577	6.17494e-24	-0.800125	0.224159	0.217149	0.228069	0.216749	6.36488e-25
DDX17	6.27805e-24	-1.18786	0.933777	0.957717	3.30035	4.18747	6.47717e-25
TRPM7	7.07888e-24	0.365557	0.851195	0.631149	2.37298	1.02347	7.31015e-25
METTL4	7.62657e-24	-0.68443	0.244418	0.227985	0.2678	0.235741	7.88302e-25
POLR2A	7.65936e-24	2.75742	0.458138	0.0754191	0.482158	0.0404905	7.92424e-25
DST	8.10113e-24	-0.922791	0.993604	0.991677	11.2956	11.8746	8.38902e-25
FCHO2	8.40691e-24	-1.12455	0.500583	0.582152	0.721842	0.884298	8.7137e-25
BCO2	8.86067e-24	-1.20095	0.0872191	0.119077	0.0850992	0.110193	9.19248e-25
ZBED5-AS1	9.06295e-24	-1.72977	0.0797289	0.141416	0.0704448	0.133895	9.41099e-25
IGF2BP2-AS1	9.78219e-24	1.53182	0.124955	0.026697	0.11525	0.0215891	1.01672e-24
CHSY1	1.00496e-23	-0.419993	0.541529	0.40128	0.804876	0.592131	1.04547e-24
CCNH	1.0667e-23	-1.04258	0.798026	0.831848	1.93067	2.24828	1.11072e-24
RLF	1.11177e-23	0.38415	0.532232	0.302776	0.787241	0.333397	1.15871e-24
TATDN3	1.2454e-23	-1.03304	0.189538	0.212438	0.186524	0.214725	1.29918e-24
KCNC1	1.25915e-23	-0.839926	0.26979	0.280868	0.282332	0.279217	1.31472e-24
GPT2	1.29218e-23	-1.40213	0.273547	0.354089	0.28503	0.423307	1.35045e-24
PIK3R1	1.31878e-23	-1.21021	0.872477	0.928978	2.81285	3.60765	1.3795e-24
LINC02223	1.32243e-23	-5.17185	0.0124837	0.1826	0.0124836	0.273884	1.38458e-24
HARS1	1.45476e-23	0.875868	0.609274	0.255428	0.848814	0.245462	1.52452e-24
SOCS4	1.5484e-23	0.64383	0.448199	0.204586	0.558209	0.193875	1.62414e-24
DTX4	1.58845e-23	-0.812402	0.129236	0.134506	0.11801	0.115111	1.66766e-24
LENG8	1.59839e-23	1.13101	0.402925	0.196498	0.467608	0.11686	1.67962e-24
SUSD4	1.64031e-23	-0.799779	0.30793	0.301519	0.380974	0.363589	1.72524e-24
SQSTM1	1.6993e-23	2.37558	0.905362	0.407797	3.63368	0.373934	1.78891e-24
NCK1-DT	1.8652e-23	1.08368	0.270479	0.0953241	0.297516	0.0770172	1.96534e-24
P4HA1	1.87291e-23	1.32688	0.786708	0.334577	1.57013	0.348584	1.97525e-24
DRAXIN	1.96895e-23	2.75099	0.622019	0.106867	0.789343	0.0654453	2.07842e-24
KMT2A	2.03686e-23	-0.516619	0.843277	0.785756	2.08298	1.6526	2.15206e-24
METTL2B	2.11353e-23	0.464895	0.49352	0.256488	0.640979	0.254724	2.23507e-24
PRIMA1	2.15325e-23	-3.25283	0.0501724	0.225511	0.0441203	0.234427	2.27914e-24
SHISA9	2.23996e-23	-2.5129	0.613459	0.932551	1.90092	6.05424	2.37305e-24
RADX	2.48391e-23	-0.70548	0.206587	0.178909	0.207279	0.185801	2.63387e-24
PID1	2.57627e-23	-1.26466	0.494067	0.591732	0.88716	1.19666	2.73428e-24
SLF2	2.58626e-23	-0.256155	0.771252	0.66452	1.7288	1.13966	2.74735e-24
TRIM26	2.62058e-23	0.669311	0.452883	0.203918	0.572418	0.197639	2.78631e-24
LINC00473	2.69635e-23	6.11457	0.123743	0.00223784	0.188326	0.00179294	2.86945e-24
ARPC2	2.77859e-23	0.879383	0.603353	0.262652	0.771889	0.228365	2.95962e-24
AL139807.1	2.89999e-23	-1.26379	0.0903816	0.128146	0.0970031	0.130729	3.0917e-24
COPB2-DT	3.07991e-23	-1.3174	0.549043	0.69318	0.959517	1.36765	3.28932e-24
LINC00886	3.07991e-23	-2.6223	0.0984663	0.287975	0.103143	0.374287	3.28939e-24
ACACB	3.13957e-23	-2.0419	0.134514	0.288838	0.140723	0.335378	3.35611e-24
TNRC6A	3.28904e-23	-0.524272	0.949875	0.937066	4.94932	3.93791	3.51903e-24
RHOA	3.62853e-23	1.29503	0.741909	0.312041	1.14931	0.253675	3.88573e-24
GPR39	3.78287e-23	-2.57422	0.103959	0.272231	0.109406	0.374208	4.05463e-24
SCAP	3.79479e-23	0.571749	0.314945	0.161242	0.324543	0.120572	4.07102e-24
ALG6	4.05557e-23	-0.612713	0.128641	0.10667	0.117642	0.098751	4.35467e-24
CNTNAP3B	4.2778e-23	-1.7241	0.209987	0.327274	0.23813	0.449232	4.59737e-24
CWF19L2	4.48625e-23	-0.578426	0.531899	0.498174	0.839391	0.698536	4.82568e-24
PPP1R3E	4.80072e-23	-1.30529	0.0852217	0.117663	0.0747293	0.103887	5.16852e-24
PLK2	5.4297e-23	1.84232	0.29761	0.0641906	0.288805	0.0444564	5.85088e-24
ULK2	5.51495e-23	-0.719419	0.290643	0.284755	0.33975	0.308928	5.94801e-24
CDC42SE2	5.64441e-23	0.557327	0.680537	0.415257	1.2813	0.479203	6.09302e-24
IGFBP5	5.81073e-23	3.78368	0.835049	0.197519	3.35901	0.128523	6.27812e-24
PCDHB14	5.86028e-23	-1.3746	0.0967543	0.115465	0.0728767	0.104682	6.33725e-24
LINC00882	6.43928e-23	-1.62427	0.419879	0.611401	0.667979	1.18905	6.96953e-24
RAD23B	6.54e-23	0.575112	0.677779	0.387735	1.15481	0.426215	7.08479e-24
HSPA5	6.58908e-23	3.37409	0.817144	0.253779	3.35729	0.174174	7.14426e-24
PTCHD1	6.89516e-23	-2.25142	0.127904	0.255192	0.134637	0.333063	7.48271e-24
AC004158.1	6.96712e-23	-1.37918	0.415171	0.520396	0.580064	0.837042	7.56746e-24
WDR11	6.97224e-23	-0.689698	0.654286	0.620431	1.06637	0.953116	7.57968e-24
CNOT1	7.81168e-23	0.663188	0.694614	0.386754	1.19958	0.41512	8.49971e-24
DERA	8.04222e-23	-1.2372	0.398312	0.499509	0.548967	0.732721	8.75825e-24
G3BP1	8.11504e-23	0.472931	0.722887	0.433787	1.23123	0.4901	8.8453e-24
AP2A1	8.19494e-23	1.77189	0.332493	0.0887284	0.297937	0.0478538	8.94021e-24
PCYT1A	8.54909e-23	0.66932	0.341505	0.145538	0.351117	0.119764	9.33475e-24
G2E3-AS1	8.63295e-23	0.702884	0.163762	0.0685878	0.174691	0.059539	9.43456e-24
NTAN1	9.46535e-23	0.982506	0.120533	0.0374151	0.102241	0.0287051	1.03533e-23
KCND2	1.0151e-22	-2.89058	0.539912	0.877194	1.90313	7.86537	1.1113e-23
OPTN	1.06472e-22	0.852615	0.78345	0.419497	1.60161	0.47906	1.16664e-23
PUS7L	1.08035e-22	-0.813549	0.45664	0.457383	0.622069	0.607056	1.18582e-23
PIP4P2	1.08035e-22	0.711496	0.485983	0.213537	0.660322	0.222948	1.18521e-23
CDYL	1.17814e-22	-0.884956	0.623469	0.627105	1.1839	1.17877	1.29428e-23
GFPT1	1.37059e-22	1.34078	0.485388	0.158337	0.641083	0.139773	1.50702e-23
SERP2	1.46096e-22	-1.16376	0.155534	0.168623	0.126587	0.157985	1.60778e-23
ACLY	1.46838e-22	1.24739	0.353585	0.108673	0.299846	0.0700921	1.61735e-23
HSPA4	1.51786e-22	1.45788	0.785043	0.309332	1.39327	0.275161	1.6733e-23
ARHGEF10L	1.6218e-22	-0.89887	0.242492	0.243375	0.238186	0.243258	1.78943e-23
AC090517.4	1.84036e-22	-1.59114	0.292545	0.437164	0.368812	0.638225	2.03234e-23
IFT88	1.95327e-22	-0.752039	0.54997	0.537395	0.884219	0.833229	2.1589e-23
C6orf141	1.96791e-22	2.89249	0.141244	0.0130344	0.173576	0.013289	2.17696e-23
SLC1A1	1.97527e-22	-1.10206	0.368565	0.405127	0.504855	0.609066	2.18699e-23
NOCT	2.10534e-22	1.24087	0.309904	0.102823	0.371645	0.0864537	2.33301e-23
AGRN	2.11008e-22	4.15354	0.1202	0.00793059	0.0681624	0.00224393	2.34028e-23
TLN2	2.2316e-22	-1.67944	0.65129	0.843744	1.29128	2.38537	2.47719e-23
ANGEL1	2.34257e-22	-0.654428	0.198978	0.174866	0.175362	0.153068	2.60261e-23
AC021752.1	2.43866e-22	-1.49034	0.10988	0.167524	0.11205	0.172944	2.71169e-23
ZNF25	2.46721e-22	-0.606629	0.345096	0.303875	0.395176	0.327795	2.7458e-23
USP40	2.63737e-22	-0.928534	0.306575	0.32009	0.354283	0.381771	2.93769e-23
PDIA6	2.67077e-22	2.27843	0.66356	0.196537	1.10946	0.119487	2.97745e-23
DDX25	2.82255e-22	-2.20993	0.0566639	0.122689	0.042891	0.109482	3.14935e-23
MAP1LC3B2	2.8317e-22	-3.13769	0.0551896	0.226885	0.0500123	0.249957	3.16227e-23
BMP2	2.8721e-22	-1.59862	0.0741648	0.106749	0.0575445	0.092647	3.21012e-23
SLC39A9	3.18481e-22	0.502482	0.465723	0.231989	0.566358	0.221289	3.56268e-23
CLTCL1	3.25468e-22	-0.961674	0.206753	0.217267	0.229666	0.241808	3.64395e-23
DNAI7	3.29844e-22	-2.4217	0.040019	0.115072	0.0411271	0.123709	3.69609e-23
ENC1	3.35914e-22	3.79925	0.634122	0.0738487	1.28128	0.0464495	3.76732e-23
STX18-AS1	3.45009e-22	-1.49546	0.140364	0.215382	0.149611	0.240804	3.87262e-23
AP3M2	3.50658e-22	0.56689	0.32165	0.140434	0.363983	0.136714	3.93937e-23
RASSF8-AS1	3.5118e-22	-0.774733	0.43046	0.416356	0.566778	0.535529	3.94859e-23
PARP11	3.70405e-22	-0.682776	0.471573	0.446861	0.670168	0.600919	4.1683e-23
NIPA1	3.80374e-22	0.714388	0.445845	0.188293	0.517402	0.170461	4.28412e-23
BRPF1	3.88851e-22	1.47178	0.14248	0.0379255	0.111967	0.0215734	4.3833e-23
MAGT1	3.95368e-22	1.19372	0.474117	0.168584	0.517681	0.121919	4.46054e-23
RHCG	3.97724e-22	-1.18606	0.106408	0.145106	0.0814933	0.102792	4.49092e-23
IGSF9B	4.06434e-22	-2.44457	0.264321	0.576852	0.315796	1.00281	4.59315e-23
KPNA5	4.15432e-22	-0.62575	0.368327	0.337796	0.448465	0.380308	4.69881e-23
MAPK4	4.39033e-22	-2.86875	0.0339793	0.112677	0.036693	0.143199	4.96995e-23
GPATCH4	4.49322e-22	1.23782	0.115515	0.0336461	0.0980339	0.0226582	5.09071e-23
CPSF4	4.63889e-22	-0.851375	0.30881	0.277845	0.279947	0.277224	5.26019e-23
ZNF746	4.64282e-22	1.0131	0.287695	0.105493	0.280467	0.0754912	5.26908e-23
PI4KB	4.68602e-22	0.938525	0.342195	0.138039	0.343274	0.0958709	5.32259e-23
AP001439.1	4.74152e-22	1.39122	0.123981	0.0328216	0.12279	0.0259114	5.39015e-23
AC104806.2	5.02331e-22	-1.1563	0.16583	0.216874	0.187987	0.231976	5.71529e-23
ILF3	5.07814e-22	0.870365	0.559101	0.254917	0.660136	0.199899	5.78253e-23
DISC1	5.08291e-22	-2.11822	0.396386	0.69216	0.594379	1.46499	5.79281e-23
INTU	5.28848e-22	-0.879665	0.339484	0.351341	0.435149	0.442751	6.03214e-23
CD276	5.69562e-22	1.5463	0.495209	0.140945	0.527807	0.0974464	6.50197e-23
C5orf34	5.7246e-22	1.31589	0.170372	0.0527266	0.198612	0.0455017	6.54053e-23
SCART1	5.91868e-22	-0.838149	0.186755	0.198029	0.218192	0.220108	6.76793e-23
DNM1L	6.43197e-22	-0.565797	0.75991	0.706254	1.57561	1.27105	7.361e-23
LMO2	6.88693e-22	-2.0698	0.124551	0.190609	0.0909801	0.199902	7.88826e-23
AP1B1	7.05409e-22	0.714415	0.38307	0.178477	0.379321	0.126023	8.08647e-23
CDC42BPB	7.16399e-22	0.58943	0.873499	0.607514	2.45978	0.889068	8.21928e-23
ZNF75D	7.86956e-22	-0.470814	0.484247	0.419772	0.773318	0.595916	9.03631e-23
NFIA	8.33635e-22	-1.52032	0.843467	0.948294	2.99548	4.92503	9.58027e-23
SESN2	8.57001e-22	1.84614	0.290952	0.0602646	0.271733	0.0412644	9.85699e-23
TAFA1	9.0857e-22	-3.07598	0.0846748	0.29461	0.113258	0.535237	1.04588e-22
SNRK	9.45404e-22	0.430585	0.43669	0.234502	0.561701	0.230309	1.08918e-22
AFF4	9.63894e-22	0.444327	0.926477	0.721762	3.18702	1.29416	1.11141e-22
KIF1B	9.73511e-22	-0.425965	0.9309	0.87951	3.51695	2.62636	1.12343e-22
MARCHF5	9.99654e-22	0.638641	0.513304	0.244906	0.68774	0.241446	1.15455e-22
C2orf76	1.01358e-21	-0.788212	0.151968	0.144282	0.144289	0.140357	1.1716e-22
ZMPSTE24	1.016e-21	1.36975	0.34745	0.0951278	0.349632	0.0720291	1.17536e-22
MTUS1	1.03813e-21	-2.69046	0.174961	0.438028	0.164811	0.612713	1.20197e-22
ZBED3	1.12417e-21	-0.877402	0.203186	0.213419	0.214407	0.220558	1.30265e-22
PCBP2	1.12427e-21	0.348707	0.745024	0.497075	1.33807	0.57899	1.30385e-22
ANKRD20A1	1.16957e-21	-1.73632	0.0700511	0.125358	0.0699433	0.130031	1.35749e-22
PIAS1	1.20832e-21	-0.348881	0.820378	0.741157	2.11049	1.49205	1.40363e-22
ADAMTS9-AS2	1.21627e-21	-2.57644	0.541695	0.902085	1.24815	4.01792	1.41402e-22
SP3	1.22662e-21	0.511826	0.532136	0.293903	0.787841	0.302037	1.42722e-22
PELI1	1.26586e-21	1.40233	0.490643	0.192336	0.758719	0.162175	1.47409e-22
KCNAB1	1.29142e-21	-1.03156	0.120842	0.139335	0.128338	0.142572	1.5051e-22
ANO10	1.31442e-21	0.472261	0.764142	0.501551	1.85767	0.742839	1.53315e-22
TTC39B	1.38641e-21	-0.614837	0.41334	0.368066	0.556713	0.467789	1.61845e-22
PLXNC1	1.52933e-21	-1.83555	0.101462	0.197244	0.0935564	0.194186	1.78675e-22
HSD17B11	1.54363e-21	-1.7442	0.109737	0.170508	0.0885977	0.165427	1.80494e-22
AL392023.2	1.62142e-21	-3.94885	0.132374	0.603667	0.17776	1.50747	1.89744e-22
PRICKLE2	1.70634e-21	-0.900686	0.790108	0.779396	2.26662	2.36823	1.99845e-22
VSNL1	1.73222e-21	2.74723	0.159291	0.0159004	0.220622	0.0174227	2.03041e-22
GKAP1	1.81952e-21	-1.1819	0.273309	0.342232	0.31524	0.40201	2.13448e-22
LUC7L3	1.84912e-21	-1.01959	0.758863	0.797495	1.49277	1.7159	2.17096e-22
ZNF780B	2.0025e-21	-0.515047	0.327714	0.281811	0.390633	0.308432	2.35487e-22
ACBD3	2.0025e-21	0.88617	0.503602	0.204468	0.645394	0.191322	2.3532e-22
VSTM4	2.14146e-21	-0.866925	0.250386	0.266538	0.268096	0.267744	2.52033e-22
ESR2	2.1789e-21	-1.20452	0.167947	0.219779	0.192795	0.241421	2.56647e-22
METTL25	2.21155e-21	-1.22931	0.437879	0.530918	0.654761	0.854501	2.60704e-22
SOS1	2.21299e-21	-0.583001	0.644989	0.60724	1.17857	0.988099	2.61085e-22
B4GALT1	2.37704e-21	1.45682	0.240756	0.0626202	0.208843	0.0418377	2.80667e-22
EIF2S3	2.55347e-21	0.69933	0.643086	0.331632	0.920177	0.311017	3.01743e-22
ANKRD11	2.76013e-21	0.629659	0.898324	0.654705	2.78336	0.99735	3.26428e-22
NREP	2.80247e-21	-1.7999	0.134633	0.244435	0.136645	0.273809	3.31702e-22
FAM156A	2.82116e-21	-1.04	0.161955	0.191159	0.168014	0.194159	3.34184e-22
SETDB2	3.04478e-21	-0.871418	0.182309	0.184209	0.186602	0.19304	3.60964e-22
USP38-DT	3.40265e-21	-1.19955	0.612674	0.729928	1.37856	1.80363	4.03715e-22
XRCC5	3.40835e-21	0.493545	0.823897	0.534294	1.79595	0.698992	4.04717e-22
ZNF318	3.42693e-21	-0.847689	0.480418	0.485768	0.671489	0.65827	4.07251e-22
CDKN3	3.64536e-21	1.59794	0.121341	0.0254407	0.11083	0.0198349	4.33557e-22
LRP12	3.70933e-21	0.907253	0.647343	0.292764	1.12649	0.32034	4.41519e-22
SGSM3-AS1	3.77107e-21	1.21752	0.124837	0.0347847	0.129562	0.0302641	4.49228e-22
PEG10	3.875e-21	3.84254	0.400594	0.0315653	0.42089	0.0157772	4.6198e-22
LYSMD4	3.92844e-21	-0.804783	0.108501	0.0998783	0.0937031	0.0900317	4.68725e-22
SH3BGRL2	4.0489e-21	-1.45456	0.0926168	0.140356	0.0900266	0.138616	4.83485e-22
PAAF1	4.28332e-21	-0.535687	0.275758	0.233952	0.290043	0.233475	5.11887e-22
GPER1	4.4534e-21	1.28372	0.117774	0.0336461	0.0966739	0.0213204	5.32709e-22
TMEM178B	4.4534e-21	-0.337666	0.929592	0.879471	4.66418	3.25364	5.33064e-22
BEND6	4.51063e-21	-0.683868	0.298443	0.273134	0.382682	0.345506	5.40345e-22
ODF2L	4.84666e-21	-0.610909	0.291594	0.260846	0.339809	0.286944	5.81062e-22
ACVR1	4.93392e-21	0.934033	0.43027	0.170704	0.567691	0.162795	5.91995e-22
BEND7P1	5.0707e-21	1.13288	0.201474	0.0674885	0.197237	0.0491613	6.08891e-22
SMCO4	5.1099e-21	-0.856122	0.130829	0.120608	0.103477	0.102692	6.14087e-22
USP12	5.49076e-21	0.761242	0.679848	0.361077	1.37454	0.437115	6.6038e-22
TBK1	5.67109e-21	0.640044	0.684104	0.375486	1.2257	0.437369	6.82612e-22
TAMM41	5.82021e-21	-0.535978	0.404328	0.3641	0.501396	0.401438	7.01117e-22
RRP36	6.38091e-21	0.73245	0.358649	0.136822	0.34213	0.112802	7.69269e-22
DOP1A	6.50191e-21	-0.422006	0.769017	0.710416	1.80188	1.32251	7.84478e-22
HERC1	7.16831e-21	-0.422636	0.835287	0.773586	2.15604	1.61042	8.65566e-22
KCTD10	7.19813e-21	0.920506	0.263893	0.0924581	0.255809	0.0747698	8.69854e-22
TMC7	7.24037e-21	1.17821	0.239805	0.0727887	0.265615	0.063694	8.7565e-22
SMARCD1	7.40528e-21	0.825818	0.604708	0.2813	0.912648	0.282984	8.96303e-22
CEP85	7.82187e-21	1.63216	0.103174	0.0221821	0.101306	0.0181167	9.47471e-22
SPIN1	8.20169e-21	-0.672105	0.532065	0.505359	0.788622	0.698466	9.94263e-22
PTK7	8.25675e-21	0.934321	0.297967	0.134113	0.279196	0.08008	1.00173e-21
SP4	8.58517e-21	-0.834861	0.321626	0.3259	0.388271	0.379735	1.04239e-21
ZC3H6	9.12845e-21	-1.19019	0.334871	0.39967	0.401896	0.520214	1.10923e-21
AL359232.1	1.07693e-20	-1.25129	0.253382	0.302619	0.353059	0.463711	1.31067e-21
ZNF226	1.07693e-20	-0.669075	0.197598	0.168309	0.183065	0.160532	1.30984e-21
SMIM15-AS1	1.08628e-20	-0.838832	0.16331	0.174355	0.156494	0.152811	1.32308e-21
WDR47	1.11646e-20	0.73658	0.320984	0.129873	0.347206	0.116178	1.36092e-21
SNAP25	1.15219e-20	-0.97463	0.80195	0.835146	2.26958	2.48899	1.40667e-21
AHI1	1.15219e-20	-0.736072	0.854262	0.863649	2.80755	2.63264	1.40594e-21
ZSCAN5A	1.15538e-20	-0.883424	0.260302	0.269836	0.313759	0.319353	1.41167e-21
SLC31A1	1.17189e-20	1.32017	0.312567	0.0902203	0.329178	0.0716672	1.43295e-21
RBFOX1	1.2227e-20	-2.30371	0.757032	0.955243	3.08848	8.5555	1.49625e-21
USB1	1.24973e-20	1.04721	0.169516	0.0499784	0.136184	0.0357192	1.53053e-21
AC092131.1	1.32377e-20	-4.62994	0.0298181	0.180951	0.0560666	0.762889	1.62247e-21
LINC02251	1.46799e-20	-4.20182	0.0228035	0.198971	0.0222058	0.21876	1.80063e-21
POT1	1.47465e-20	-0.771547	0.431483	0.431353	0.584777	0.561972	1.8102e-21
VASP	1.48149e-20	1.95782	0.152087	0.0281889	0.107041	0.0146482	1.82001e-21
ADAM7-AS1	1.60088e-20	-2.21912	0.150018	0.274233	0.174882	0.474733	1.96822e-21
SEC63	1.60242e-20	0.529586	0.788753	0.484276	1.63878	0.620999	1.97165e-21
VPS13B-DT	1.64092e-20	-0.524508	0.275829	0.238978	0.304623	0.240226	2.02058e-21
SEH1L	1.68799e-20	0.786975	0.184758	0.0701975	0.162367	0.0509193	2.08016e-21
DENND11	1.69435e-20	-0.619777	0.282654	0.250599	0.300122	0.254224	2.08961e-21
VPS50	1.73684e-20	-0.524641	0.615242	0.543481	1.03411	0.829894	2.14368e-21
MYCBP2	1.76348e-20	-0.359978	0.932874	0.892505	3.81021	2.71498	2.17823e-21
IPO7	1.87858e-20	0.844285	0.681013	0.336068	1.06302	0.328263	2.32221e-21
ANKRD20A3P	1.96815e-20	-1.95067	0.0560219	0.117388	0.0541428	0.11441	2.43668e-21
SYNE1	1.96815e-20	-1.32525	0.824634	0.913863	2.31699	3.32392	2.43584e-21
SND1	2.01545e-20	0.639851	0.923362	0.720349	3.7351	1.33358	2.49717e-21
PURA	2.20773e-20	-0.765908	0.544858	0.537867	0.760172	0.717505	2.73963e-21
TAGAP-AS1	2.20773e-20	-0.971466	0.21888	0.243846	0.241235	0.263737	2.73805e-21
REEP2	2.26908e-20	1.33944	0.479348	0.158141	0.475403	0.102077	2.81792e-21
POM121	2.31946e-20	0.540674	0.609559	0.334655	0.919147	0.345657	2.8827e-21
DNM2	2.32019e-20	0.684162	0.405398	0.196537	0.462822	0.160628	2.88582e-21
TRIM9	2.33946e-20	-1.12969	0.946285	0.975776	5.40588	6.57999	2.91204e-21
DPP10	2.43858e-20	-2.67851	0.0732136	0.153665	0.0884833	0.316752	3.03775e-21
FAM219A	2.51673e-20	1.00981	0.486316	0.21868	0.671365	0.187391	3.13749e-21
SEMA3E	2.60458e-20	-1.8745	0.135323	0.233717	0.1641	0.327216	3.24951e-21
KCNMB2-AS1	2.87165e-20	-1.16175	0.697396	0.814495	2.47787	3.17309	3.58545e-21
ZNF121	2.91018e-20	0.742401	0.244584	0.100663	0.24656	0.0802989	3.63634e-21
SLC48A1	3.00423e-20	-1.05174	0.148282	0.16454	0.107195	0.119993	3.75672e-21
GINS3	3.13193e-20	-2.75038	0.0530734	0.166974	0.0499842	0.191634	3.9194e-21
RMDN2	3.19795e-20	-0.847397	0.142076	0.143339	0.152954	0.148743	4.00507e-21
ETF1	3.36084e-20	1.16977	0.541791	0.195752	0.674385	0.165422	4.21229e-21
PPM1D	3.41586e-20	0.652251	0.351516	0.160378	0.437772	0.155239	4.28451e-21
SLC35F3	3.42066e-20	-2.49615	0.0856973	0.232264	0.0953085	0.317995	4.2938e-21
SLC22A3	3.58614e-20	-3.1843	0.0227559	0.108437	0.0232117	0.122274	4.50494e-21
EEF2K	3.76185e-20	-1.12294	0.309262	0.356209	0.349287	0.433561	4.72926e-21
CLK4	3.8595e-20	-0.892803	0.473879	0.482313	0.619471	0.629613	4.85571e-21
ZDHHC9	4.08175e-20	-1.37136	0.202425	0.213301	0.15862	0.22536	5.13923e-21
SLC7A14	4.17983e-20	-2.48451	0.11397	0.309686	0.110339	0.345418	5.26671e-21
KANSL2	4.60589e-20	0.667858	0.380026	0.171057	0.450829	0.154692	5.80796e-21
GALNT16	4.66512e-20	-1.20274	0.175128	0.210043	0.163773	0.204204	5.88711e-21
STAU1	4.71659e-20	0.63027	0.692926	0.370735	1.19032	0.423581	5.95656e-21
ST3GAL2	4.73421e-20	1.3195	0.374105	0.118331	0.44089	0.0971904	5.98334e-21
PRKX	5.00169e-20	-1.21558	0.144454	0.172549	0.140089	0.17983	6.32617e-21
SYNPO2L-AS1	5.07238e-20	-1.08847	0.0973725	0.115622	0.0937649	0.110705	6.42043e-21
SCGB2B2	5.09437e-20	-1.10578	0.169968	0.195202	0.191549	0.234986	6.45313e-21
NUDT12	5.10832e-20	-0.866941	0.164832	0.157905	0.151075	0.149391	6.47568e-21
PEX3	5.20654e-20	-0.46569	0.406824	0.340937	0.521018	0.397477	6.60516e-21
TTC14	5.5236e-20	-0.75911	0.686791	0.679793	1.17837	1.10843	7.01267e-21
AGO4	5.54431e-20	-0.7895	0.326881	0.336186	0.385774	0.370033	7.04426e-21
OSBPL11	5.55981e-20	-0.700075	0.312805	0.272663	0.359004	0.319433	7.06926e-21
EDEM1	5.58807e-20	0.831205	0.240447	0.0906521	0.225632	0.0693633	7.11054e-21
KLHL3	5.91777e-20	-1.62141	0.087338	0.147462	0.0841048	0.146976	7.53572e-21
TAF8	6.3614e-20	-0.78775	0.145476	0.138982	0.136237	0.131492	8.10671e-21
EDA	6.7165e-20	-1.21806	0.26054	0.319147	0.380904	0.481685	8.56565e-21
CTBS	6.98116e-20	-0.97164	0.178219	0.184524	0.162052	0.176419	8.90985e-21
CAHM	7.01651e-20	-1.58822	0.0811794	0.135919	0.0577883	0.0988395	8.96167e-21
PCDH9-AS4	7.16467e-20	-0.84328	0.244965	0.269561	0.283353	0.276806	9.15774e-21
RN7SL445P	7.2095e-20	0.908292	0.292427	0.109654	0.317568	0.0925992	9.22194e-21
ZNF561	7.5196e-20	0.932337	0.142742	0.0502532	0.131202	0.0377672	9.62578e-21
AAK1	7.58998e-20	0.625324	0.783926	0.502807	1.87244	0.665885	9.72311e-21
AQP4	8.55783e-20	-2.89892	0.280442	0.554591	0.241788	0.916628	1.09712e-20
SELENOP	8.7801e-20	-2.59035	0.0724052	0.233442	0.0519835	0.178619	1.12645e-20
CAP2	9.08288e-20	0.614808	0.606515	0.313886	1.0775	0.387246	1.16616e-20
LINC01876	9.34054e-20	-1.33654	0.342837	0.42354	0.603592	0.874023	1.20014e-20
SRPK1	9.83527e-20	0.429599	0.501629	0.270229	0.725603	0.296214	1.26464e-20
AREL1	1.01508e-19	0.733782	0.458685	0.199914	0.588478	0.193363	1.30619e-20
RGMA	1.09475e-19	-1.88944	0.141981	0.238703	0.123384	0.245374	1.40974e-20
NOTCH2	1.12659e-19	-1.16383	0.239639	0.285187	0.221574	0.279957	1.45183e-20
NKD1	1.13465e-19	-2.77628	0.0491261	0.178713	0.045522	0.182473	1.46329e-20
DHCR24	1.15897e-19	4.05151	0.260278	0.0165286	0.178842	0.00577594	1.49576e-20
KNDC1	1.16774e-19	-1.08986	0.131613	0.156295	0.127252	0.145375	1.5082e-20
CYP4V2	1.18828e-19	-0.88673	0.334514	0.343135	0.37617	0.383305	1.53587e-20
RAB31	1.26505e-19	-0.846363	0.952705	0.925131	4.2637	4.2638	1.6363e-20
OS9	1.28651e-19	3.83896	0.542171	0.0640729	0.706351	0.0278637	1.66529e-20
ARFGAP1	1.3834e-19	0.628402	0.420973	0.213969	0.463683	0.164695	1.79203e-20
NEPRO-AS1	1.40256e-19	-1.22686	0.149281	0.183267	0.17197	0.216571	1.81818e-20
CSAD	1.43614e-19	-0.62925	0.506551	0.473833	0.745286	0.63799	1.86309e-20
MIR4300HG	1.55661e-19	-3.48514	0.229961	0.721409	0.459264	3.00984	2.02086e-20
SHC1	1.68657e-19	1.93668	0.232529	0.0433827	0.160401	0.0220127	2.19119e-20
USP15	1.76023e-19	0.591671	0.902556	0.662008	3.03361	1.10371	2.28857e-20
EEA1	1.761e-19	0.603259	0.955653	0.74202	4.41587	1.59705	2.29125e-20
CHD1	1.76824e-19	0.71023	0.802592	0.498999	1.97159	0.665256	2.30236e-20
GOT1	1.84031e-19	0.867914	0.358316	0.123395	0.353124	0.103862	2.39796e-20
FRY	1.84174e-19	-1.12406	0.585852	0.686271	1.08454	1.34204	2.40158e-20
UBAP2L	2.13083e-19	0.550616	0.426489	0.202701	0.460555	0.172308	2.78058e-20
HIBCH	2.1374e-19	-0.665033	0.539555	0.514664	0.845555	0.756124	2.7912e-20
PTPRS	2.21175e-19	1.23954	0.613744	0.253386	0.77089	0.178479	2.89041e-20
LRR1	2.30104e-19	1.21256	0.171727	0.0485258	0.154217	0.0359271	3.00929e-20
CDADC1	2.32123e-19	-0.929885	0.183236	0.193868	0.186987	0.198618	3.03791e-20
C1S	2.37582e-19	-0.77448	0.316157	0.275372	0.256541	0.237723	3.11163e-20
FAM104A	2.47523e-19	0.742167	0.228487	0.0881787	0.209413	0.0682344	3.24418e-20
PTCHD1-AS	2.49547e-19	-1.64512	0.687243	0.850693	2.511	4.3846	3.2731e-20
ANOS1	2.67916e-19	-2.12865	0.24827	0.470339	0.342785	0.887749	3.51659e-20
CFAP44	2.72609e-19	-1.51733	0.109999	0.177535	0.11579	0.189969	3.58079e-20
SNX8	2.76208e-19	1.16159	0.262109	0.0838208	0.266644	0.0644993	3.6307e-20
AC113386.1	2.77553e-19	3.63002	0.19912	0.0160575	0.249982	0.0103759	3.65104e-20
HMG20B	2.82599e-19	1.94851	0.143479	0.022771	0.103458	0.0147591	3.72011e-20
INSR	2.82798e-19	-0.675511	0.322245	0.322053	0.352591	0.313328	3.72543e-20
METAP1D	3.10662e-19	-1.11982	0.127191	0.153272	0.131492	0.156117	4.09547e-20
SYNE3	3.16703e-19	-1.40026	0.295732	0.391936	0.295343	0.440113	4.17813e-20
MTERF4	3.61952e-19	-0.633449	0.256093	0.227278	0.240455	0.203419	4.77854e-20
DDX21	3.76963e-19	1.17365	0.674759	0.261709	1.08688	0.262362	4.98032e-20
TAOK2	3.80941e-19	1.03903	0.211437	0.0728672	0.156214	0.0411547	5.03651e-20
CCDC30	3.90382e-19	-1.46686	0.166972	0.247536	0.189777	0.2993	5.16506e-20
TSBP1	3.97252e-19	-1.57295	0.0828677	0.146677	0.0796939	0.130217	5.25976e-20
AC073610.3	4.19097e-19	1.31363	0.171513	0.0452279	0.183424	0.0404258	5.553e-20
SLC2A13	4.29265e-19	0.327447	0.70988	0.476817	1.65221	0.731907	5.69182e-20
PLIN2	4.38411e-19	-1.22343	0.164618	0.174237	0.130958	0.166721	5.81728e-20
SLC15A4	4.41429e-19	-0.398738	0.418523	0.33972	0.474802	0.343647	5.86154e-20
PPP4R3A	4.82646e-19	0.422514	0.781619	0.515567	1.64296	0.67388	6.41346e-20
SCN3A	5.15112e-19	-0.944805	0.311949	0.322327	0.383597	0.41628	6.84978e-20
MPZL1	5.16021e-19	0.598566	0.527714	0.265714	0.718784	0.264224	6.8668e-20
THSD7A	5.16964e-19	-2.94256	0.0785162	0.283499	0.0903406	0.394533	6.8843e-20
MAGI1	5.21739e-19	-0.57278	0.72184	0.684268	1.73188	1.4446	6.95286e-20
TSNARE1	5.22046e-19	-1.09789	0.110094	0.133053	0.0982641	0.117433	6.96194e-20
NPTX1	5.67164e-19	6.78982	0.210367	0.00168819	0.174587	0.000779985	7.56905e-20
HERC3	5.67549e-19	-0.484977	0.27621	0.23831	0.30693	0.236453	7.57961e-20
DZIP3	6.02424e-19	-0.633398	0.637855	0.599937	1.12149	0.969766	8.05112e-20
RAP1A	6.10612e-19	0.372257	0.602544	0.373327	0.971126	0.416757	8.16638e-20
GGNBP2	6.11877e-19	0.741823	0.533658	0.244906	0.694152	0.227104	8.18914e-20
PKD2L2	6.39582e-19	1.35967	0.129806	0.0376899	0.12238	0.0255644	8.56605e-20
ZXDC	6.4731e-19	-0.634643	0.339674	0.31212	0.389452	0.338822	8.67574e-20
DLAT	6.70803e-19	0.582667	0.309547	0.133367	0.330937	0.120601	8.99702e-20
ARHGEF6	6.95762e-19	-1.59199	0.611366	0.745004	1.0734	1.79751	9.33842e-20
WARS2-AS1	7.40047e-19	-1.36204	0.188444	0.250363	0.21287	0.314165	9.93987e-20
ZNF487	8.37114e-19	-0.80976	0.13537	0.132661	0.128048	0.122419	1.12516e-19
KNSTRN	8.49412e-19	1.35433	0.169397	0.0433827	0.15646	0.0324674	1.1425e-19
LINC02666	8.57327e-19	-1.31941	0.117584	0.164619	0.124055	0.174297	1.15397e-19
AP3D1	8.65254e-19	0.673642	0.320842	0.142868	0.310974	0.107455	1.16546e-19
FAM149A	8.65322e-19	-0.802512	0.138414	0.10298	0.123649	0.117796	1.16638e-19
SYTL4	9.09237e-19	-1.92804	0.149518	0.24573	0.136063	0.283383	1.22644e-19
ITGB4	9.57055e-19	-5.01483	0.00877422	0.140866	0.00510719	0.102018	1.29186e-19
MTERF2	9.76111e-19	-0.605469	0.278469	0.239881	0.289052	0.241173	1.31851e-19
MFF	1.00447e-18	-0.435291	0.501605	0.407876	0.652883	0.482073	1.35778e-19
CCT5	1.00458e-18	1.77846	0.684722	0.192925	0.949988	0.148739	1.35889e-19
DAB2	1.01461e-18	-1.31	0.275449	0.35083	0.283648	0.392541	1.37343e-19
UBTF	1.02974e-18	1.45366	0.428843	0.135841	0.444009	0.0884292	1.39489e-19
FAM110B	1.03904e-18	-0.8841	0.667198	0.678811	1.35265	1.39567	1.40849e-19
MACROD1	1.06834e-18	-0.910171	0.111568	0.125515	0.0935515	0.0960396	1.44922e-19
UACA	1.09491e-18	-1.50691	0.100178	0.143614	0.0961424	0.151652	1.4863e-19
UBTD2	1.10554e-18	0.768191	0.525146	0.234581	0.779233	0.247758	1.50179e-19
STXBP5	1.1107e-18	-0.560534	0.657401	0.619567	1.34739	1.11452	1.50987e-19
PCSK5	1.17402e-18	-1.74024	0.5669	0.781045	1.05224	2.04809	1.59707e-19
C3orf70	1.26294e-18	-1.7944	0.353061	0.543285	0.446293	0.853964	1.71923e-19
GALNT11	1.26533e-18	0.565864	0.756818	0.452789	1.53466	0.564886	1.72369e-19
CCDC160	1.27074e-18	-2.72514	0.0326715	0.101802	0.02651	0.096069	1.73227e-19
H2AZ1-DT	1.28389e-18	-1.46964	0.0866009	0.124926	0.0982163	0.152499	1.75143e-19
ZKSCAN8	1.28467e-18	-0.772009	0.187588	0.186055	0.182888	0.171354	1.75494e-19
RUFY2	1.28467e-18	-0.309578	0.779027	0.675199	1.68127	1.14568	1.7538e-19
ZNF189	1.32194e-18	-0.987715	0.221401	0.225001	0.227153	0.242928	1.80712e-19
VSIG10	1.33553e-18	-1.09606	0.267531	0.313847	0.296591	0.358606	1.82697e-19
AKAP13	1.38502e-18	-0.703236	0.82209	0.80362	2.30365	2.11971	1.896e-19
CCDC91	1.4377e-18	-0.519727	0.823826	0.790742	2.49628	1.98362	1.96949e-19
KMT2E-AS1	1.4993e-18	1.00662	0.163239	0.0590083	0.161895	0.0444091	2.0553e-19
ZFY-AS1	1.52668e-18	0.898673	0.185495	0.0647403	0.190309	0.0548422	2.0943e-19
ZNF471	1.55737e-18	-0.607227	0.204209	0.170154	0.192077	0.16159	2.13898e-19
FBXW7	1.55737e-18	0.414945	0.686292	0.416827	1.44192	0.593181	2.13938e-19
SPART	1.59763e-18	-0.353805	0.628011	0.495112	0.973755	0.682756	2.19621e-19
SYTL5	1.80575e-18	2.52313	0.216478	0.0260689	0.22616	0.0213867	2.48403e-19
DOCK7	1.83772e-18	-1.24001	0.697016	0.761965	1.45775	1.89589	2.52977e-19
CNTNAP5	1.8828e-18	-2.41707	0.314992	0.640886	0.701308	1.94513	2.59362e-19
DNAJC2	1.89664e-18	0.552516	0.562359	0.288249	0.79394	0.296672	2.6145e-19
PPIP5K1	1.9133e-18	0.716484	0.316823	0.142476	0.360857	0.120531	2.63929e-19
MED6	1.9507e-18	-0.536838	0.393794	0.34184	0.480402	0.387013	2.69274e-19
CCT4	2.03147e-18	1.31292	0.538271	0.173374	0.624022	0.134713	2.80618e-19
LUC7L2	2.0416e-18	-0.583913	0.40283	0.333674	0.431814	0.353743	2.82212e-19
CTPS1	2.08629e-18	1.61735	0.187635	0.0438538	0.175498	0.0310978	2.88589e-19
SORCS1	2.15649e-18	-1.75825	0.73801	0.92729	2.51056	4.64495	2.98506e-19
DOCK5	2.22956e-18	-1.24289	0.133016	0.133642	0.155131	0.196084	3.08832e-19
MTMR7	2.25965e-18	-1.39589	0.200333	0.274076	0.221383	0.333221	3.13217e-19
NHLRC3	2.28873e-18	-0.627619	0.283652	0.242158	0.281099	0.242982	3.17467e-19
GYS1	2.36324e-18	0.879639	0.144953	0.051431	0.125588	0.0377141	3.28027e-19
FAM174B	2.58514e-18	-0.960763	0.195958	0.21711	0.213655	0.236452	3.59075e-19
SC5D	2.6158e-18	1.29944	0.353347	0.103255	0.339747	0.074461	3.63583e-19
RBKS	2.63326e-18	-0.665509	0.142884	0.128695	0.141852	0.125223	3.66262e-19
OPA3	2.66137e-18	1.59599	0.154393	0.0361195	0.150691	0.0280316	3.70426e-19
MYEF2	2.67195e-18	-0.547543	0.80145	0.748655	1.82265	1.47683	3.72154e-19
KALRN	2.73733e-18	-0.719686	0.772084	0.760787	2.53615	2.26273	3.81522e-19
TAFAZZIN	2.8234e-18	-0.597829	0.220069	0.191983	0.187932	0.156328	3.93787e-19
DMXL1-DT	2.8992e-18	-1.62901	0.120794	0.202348	0.126588	0.223305	4.04636e-19
ACTR2	2.94116e-18	0.796442	0.583094	0.262534	0.801321	0.251712	4.10773e-19
CRTC3-AS1	3.16783e-18	-0.837376	0.127904	0.129402	0.124302	0.124574	4.42734e-19
HEATR5A-DT	3.18995e-18	-0.794358	0.11806	0.114169	0.112837	0.107083	4.46129e-19
ARL10	3.21131e-18	-0.557856	0.245559	0.205528	0.230043	0.184847	4.49425e-19
EIF2B3	3.37498e-18	0.566743	0.477494	0.237957	0.657594	0.246763	4.72652e-19
AMD1	3.53302e-18	0.593108	0.463631	0.214087	0.55724	0.200318	4.95122e-19
BCAS3	3.56299e-18	-0.752448	0.670004	0.671666	1.47814	1.40155	4.99663e-19
BTBD8	3.56968e-18	-2.34228	0.13694	0.32535	0.133739	0.389192	5.00941e-19
DIPK1A	3.5946e-18	-0.869332	0.377054	0.371599	0.48233	0.489444	5.04782e-19
CCNL1	3.67489e-18	-0.559912	0.544406	0.477288	0.713684	0.582684	5.16408e-19
TNFAIP6	3.77673e-18	2.48939	0.182356	0.0207687	0.141747	0.0134006	5.3108e-19
LINC01122	3.87698e-18	-2.80096	0.108572	0.344666	0.138344	0.572288	5.45548e-19
EFCAB7	3.89089e-18	-0.758674	0.233242	0.226689	0.250109	0.238381	5.47876e-19
ELF2	3.8987e-18	-0.712725	0.559886	0.56582	0.937651	0.867923	5.49348e-19
RFX4	3.94815e-18	-2.89391	0.305029	0.661654	0.463806	1.97937	5.56693e-19
ZNF146	4.11102e-18	0.364321	0.352729	0.184131	0.404056	0.171597	5.80052e-19
IFFO2	4.24665e-18	-0.837958	0.136678	0.129598	0.123252	0.123465	5.99595e-19
TGFBR3	4.31771e-18	-2.18119	0.0966354	0.237486	0.102906	0.270666	6.10394e-19
RANBP10	4.31771e-18	0.830084	0.35192	0.143575	0.42346	0.132618	6.10453e-19
ATP6V0A2	4.33839e-18	1.006	0.621995	0.26909	1.01738	0.270523	6.1379e-19
CLTC	4.51011e-18	1.11945	0.774747	0.36465	1.31704	0.33168	6.38515e-19
DDX50	4.61843e-18	0.470546	0.755035	0.476581	1.54346	0.613732	6.54293e-19
PKD2L2-DT	4.65734e-18	-2.58425	0.0358816	0.118959	0.0347017	0.12231	6.60249e-19
JAM3	4.8578e-18	-0.536669	0.764808	0.665109	1.48233	1.19663	6.89131e-19
TRAF3IP2	4.87931e-18	-1.15935	0.330234	0.372306	0.34594	0.430025	6.92649e-19
KIF5B	4.9501e-18	0.939783	0.883082	0.537827	2.24433	0.645033	7.03172e-19
AC060780.1	5.09352e-18	-1.40936	0.0809178	0.120647	0.0753471	0.114877	7.24032e-19
POM121C	5.26971e-18	0.642352	0.539555	0.261356	0.70646	0.245923	7.4958e-19
ZFP1	5.39045e-18	0.795265	0.126121	0.0447568	0.114485	0.0359955	7.6727e-19
CUL3	5.65988e-18	0.411865	0.698752	0.428841	1.26849	0.525231	8.06159e-19
GANC	5.6753e-18	-1.38261	0.253882	0.356131	0.295575	0.440386	8.08898e-19
TWSG1	5.6776e-18	0.721009	0.394341	0.163755	0.477409	0.157053	8.09768e-19
AC093535.1	5.98447e-18	-1.8617	0.0729521	0.143575	0.063021	0.12425	8.54108e-19
PRAG1	6.13015e-18	0.89751	0.340245	0.145499	0.493433	0.147764	8.75484e-19
POLH	6.15917e-18	0.865208	0.459184	0.197833	0.675525	0.203772	8.80218e-19
MAPK1IP1L	6.33715e-18	0.407661	0.734586	0.443642	1.28068	0.532967	9.06259e-19
ABHD15-AS1	6.60206e-18	1.3939	0.135632	0.0316438	0.123166	0.0253224	9.44774e-19
SCAF11	6.62534e-18	-0.390053	0.780335	0.691885	1.63417	1.1793	9.48737e-19
YARS2	6.8219e-18	-0.438501	0.338248	0.270936	0.377171	0.281051	9.77536e-19
PPP2R2A	6.87577e-18	0.437164	0.755748	0.469985	1.50572	0.618656	9.85912e-19
SLC35G2	6.89877e-18	1.0224	0.559077	0.219583	0.847471	0.225677	9.90528e-19
SLC51A	6.89877e-18	1.24113	0.110165	0.0282674	0.104269	0.0236301	9.90512e-19
PROM1	6.89912e-18	-2.74125	0.0289859	0.104511	0.0281259	0.107083	9.91238e-19
C18orf25	6.91055e-18	0.525616	0.40126	0.197322	0.505546	0.19138	9.942e-19
POMT2	6.91055e-18	-0.685135	0.3022	0.270033	0.313367	0.279551	9.9393e-19
NCK1	6.94671e-18	0.97225	0.594579	0.263241	0.973126	0.271859	1.00073e-18
WARS1	6.94671e-18	0.615967	0.490334	0.225433	0.648418	0.232906	1.00016e-18
IRF1	7.11639e-18	1.6761	0.273903	0.0659966	0.258935	0.0439485	1.02585e-18
UBN1	7.17164e-18	0.559415	0.527452	0.271014	0.77021	0.288292	1.0345e-18
MAP3K5	7.25119e-18	-2.0817	0.485816	0.693416	0.882234	2.01348	1.04667e-18
XRN1	7.4302e-18	-0.746358	0.707811	0.709356	1.38496	1.31727	1.07322e-18
EIF3D	7.68375e-18	1.22852	0.433361	0.145577	0.40114	0.0931511	1.11058e-18
PTP4A1	7.77322e-18	2.14877	0.367043	0.0730635	0.328968	0.0407692	1.12425e-18
AL049875.1	8.03866e-18	-1.17574	0.109048	0.141808	0.116879	0.146801	1.16341e-18
DDX59	8.06643e-18	-0.71345	0.182475	0.173374	0.18752	0.170912	1.1682e-18
SEMA6D	8.32546e-18	-1.72432	0.161931	0.270582	0.19104	0.339565	1.20651e-18
CDH22	8.50197e-18	-2.22204	0.0764475	0.177339	0.0708758	0.175483	1.2329e-18
GRK2	8.54848e-18	2.1113	0.180954	0.0397315	0.118273	0.0150538	1.24046e-18
CCT6A	8.7593e-18	1.91553	0.813958	0.281418	1.6198	0.232981	1.27189e-18
SP110	9.14872e-18	-1.15568	0.121246	0.160614	0.124685	0.158878	1.32931e-18
WASF2	9.18986e-18	-0.544701	0.447462	0.400691	0.547809	0.441509	1.33616e-18
EIF2AK2	9.35858e-18	0.408803	0.51309	0.288171	0.728049	0.302707	1.36173e-18
SAP30BP	9.35858e-18	-0.41586	0.386827	0.309371	0.416	0.303604	1.36248e-18
PISD	9.42344e-18	0.484381	0.328808	0.15979	0.345171	0.134701	1.37283e-18
STXBP6	9.49889e-18	-2.89477	0.118535	0.399356	0.152198	0.620755	1.38473e-18
GK5	1.01791e-17	-0.381576	0.280418	0.223352	0.307459	0.22022	1.48486e-18
SPTBN1	1.01879e-17	-0.565088	0.919772	0.875545	2.90624	2.39957	1.48711e-18
ABHD17B	1.02063e-17	0.627185	0.319153	0.142633	0.383616	0.135226	1.49078e-18
AP002383.2	1.02818e-17	2.50928	0.100892	0.0130344	0.0894062	0.00837197	1.50279e-18
ATG4C	1.03736e-17	-0.54055	0.235406	0.195477	0.258615	0.207704	1.5172e-18
PSMD11	1.11568e-17	0.583344	0.424516	0.196145	0.466178	0.170409	1.63281e-18
PPA2	1.14929e-17	-0.768055	0.555154	0.546111	0.871341	0.817858	1.6831e-18
YAF2	1.1555e-17	-0.606998	0.666104	0.628165	1.25362	1.07601	1.69329e-18
GNL2	1.16119e-17	1.28095	0.260278	0.0749087	0.246159	0.0554266	1.70274e-18
CACNB4	1.20002e-17	-0.50294	0.191416	0.169369	0.220577	0.17264	1.76082e-18
LRRFIP1	1.25221e-17	-0.388416	0.752729	0.659377	1.59826	1.15303	1.8386e-18
HUNK	1.28795e-17	0.980947	0.201807	0.0668211	0.237548	0.0669146	1.89231e-18
SLC6A1	1.30144e-17	-2.08392	0.233956	0.455027	0.259779	0.597255	1.91336e-18
XYLT1	1.30331e-17	-2.43235	0.582594	0.839504	1.13887	3.53	1.91736e-18
PNPLA7	1.30533e-17	-1.83753	0.074997	0.141023	0.0613615	0.125606	1.92158e-18
RALY	1.33813e-17	0.711029	0.568874	0.267245	0.732819	0.24918	1.97115e-18
RADIL	1.45427e-17	-1.35419	0.119272	0.174905	0.112013	0.163071	2.14362e-18
DOK5	1.45811e-17	1.20797	0.568208	0.22347	1.09071	0.25505	2.15067e-18
IRAK4	1.51336e-17	-1.22461	0.154203	0.196105	0.151609	0.199323	2.2336e-18
TIMM17A	1.54164e-17	0.977597	0.211152	0.0633269	0.175161	0.0481524	2.27683e-18
RNF111	1.61903e-17	0.416267	0.831173	0.592242	2.09714	0.857438	2.39267e-18
RBCK1	1.73747e-17	0.671513	0.390108	0.184798	0.40877	0.140375	2.56936e-18
RFTN2	1.74155e-17	-3.03467	0.125074	0.458286	0.13263	0.658772	2.57706e-18
C5orf15	1.76747e-17	1.07871	0.498252	0.182718	0.479689	0.124177	2.6171e-18
PPRC1	1.78223e-17	1.15006	0.170539	0.0490362	0.125895	0.0311881	2.64066e-18
ZNF365	1.81463e-17	-0.268482	0.632553	0.504378	1.39753	0.929823	2.6904e-18
SEPTIN9	1.83039e-17	-1.64748	0.178837	0.209886	0.13401	0.230115	2.71551e-18
CEP290	1.87538e-17	-0.523395	0.650339	0.593106	1.20372	0.967174	2.78405e-18
USP9Y	1.88315e-17	-0.511533	0.735775	0.696046	1.59456	1.27149	2.79738e-18
CALU	1.94167e-17	1.89894	0.819403	0.327156	1.89416	0.274826	2.88617e-18
ZNF451	1.9574e-17	-0.349132	0.640518	0.530957	1.05818	0.742701	2.91142e-18
ARRDC3-AS1	2.02285e-17	0.869331	0.185043	0.071336	0.208449	0.0633511	3.0107e-18
PPCDC	2.0395e-17	-1.36714	0.258114	0.346237	0.304786	0.43754	3.03742e-18
ADK	2.09422e-17	0.30696	0.938652	0.818657	4.85664	2.18366	3.12092e-18
CARF	2.2296e-17	-1.25777	0.201736	0.263319	0.217393	0.290505	3.3248e-18
HSP90AB1	2.29499e-17	3.40129	0.881322	0.315653	5.43914	0.283552	3.42451e-18
MCM4	2.30192e-17	1.27485	0.193128	0.0568097	0.166434	0.0370132	3.43705e-18
SEPTIN8	2.33346e-17	-1.10508	0.313613	0.330494	0.237122	0.277875	3.48638e-18
EXT2	2.44357e-17	0.342008	0.63795	0.369558	0.956083	0.413905	3.65321e-18
ATP6V0D1-DT	2.45305e-17	-1.05499	0.15494	0.185976	0.167725	0.197951	3.66973e-18
HECW1	2.63883e-17	-1.68509	0.655927	0.820188	1.693	3.03571	3.95018e-18
ANKRD36B	2.66635e-17	-0.684501	0.39698	0.401044	0.549177	0.492304	3.99393e-18
LINC00327	2.71541e-17	-1.72903	0.117394	0.20011	0.119664	0.220574	4.07e-18
NRP2	2.74333e-17	0.768485	0.442373	0.13431	0.659971	0.211347	4.11447e-18
7SK	2.89527e-17	-1.00567	0.287005	0.31636	0.328664	0.360217	4.34512e-18
KPNA3	2.92081e-17	0.474241	0.643443	0.373641	1.11236	0.440634	4.38624e-18
ZC3H12C	2.96621e-17	-0.630283	0.448365	0.411291	0.62147	0.525559	4.45725e-18
CHN1	2.9789e-17	-0.518953	0.32914	0.273919	0.438652	0.346194	4.47917e-18
HSPH1	2.98623e-17	1.52171	0.629557	0.202897	0.923823	0.177484	4.49304e-18
ENTR1	3.10874e-17	0.722591	0.207966	0.0765184	0.161683	0.0543152	4.68034e-18
ABRAXAS2	3.22537e-17	0.539183	0.353822	0.16136	0.395064	0.150413	4.85901e-18
KLHL29	3.30687e-17	-1.22615	0.260421	0.290212	0.361182	0.447456	4.98494e-18
AEN	3.35361e-17	1.30437	0.373749	0.119312	0.396584	0.0853789	5.05861e-18
UNKL	3.37768e-17	-1.33897	0.105528	0.145695	0.0833034	0.119355	5.09814e-18
AC068533.3	3.4969e-17	1.01209	0.213221	0.0773429	0.200924	0.0546353	5.28143e-18
LINC02615	3.63868e-17	-1.31489	0.107074	0.152252	0.119799	0.171312	5.49904e-18
TSHR	3.93135e-17	-1.47449	0.0638925	0.107848	0.0591339	0.0939508	5.9451e-18
ANKRD50	3.95299e-17	1.1134	0.311925	0.100546	0.351676	0.0893529	5.98159e-18
SOX13	3.97673e-17	-0.944364	0.231958	0.250049	0.235466	0.256042	6.02132e-18
NAF1	4.04721e-17	-0.674674	0.191202	0.17251	0.193316	0.171226	6.1319e-18
IQGAP1	4.15488e-17	0.523523	0.854809	0.582466	2.27539	0.88595	6.29901e-18
TTLL6	4.32165e-17	-3.50215	0.0262038	0.141887	0.0232702	0.140606	6.55597e-18
CKMT2-AS1	4.61296e-17	-0.435112	0.498324	0.427192	0.764866	0.576505	7.00228e-18
CFAP70	4.65933e-17	-0.759131	0.285412	0.286365	0.371614	0.353825	7.08158e-18
PPME1	4.65933e-17	0.43286	0.559719	0.303954	0.842146	0.342465	7.07805e-18
ATXN7L3	4.69865e-17	1.27657	0.122839	0.0370225	0.0986595	0.0226068	7.14582e-18
DCBLD2	4.83984e-17	2.48429	0.921436	0.472459	7.06679	0.672906	7.36518e-18
MTHFD2L	4.89592e-17	-0.830587	0.258756	0.255114	0.291028	0.289858	7.45519e-18
ZNF207	4.91945e-17	-0.310972	0.551017	0.435672	0.751448	0.51229	7.49572e-18
HSDL2-AS1	4.99389e-17	-0.897762	0.180193	0.186801	0.198636	0.211287	7.61392e-18
ELMO1	5.1438e-17	-1.47468	0.427226	0.608457	0.738714	1.13663	7.84739e-18
TCP11L1	5.15854e-17	-0.45892	0.357009	0.295787	0.410213	0.31321	7.87481e-18
TIA1	5.2708e-17	-0.890181	0.249293	0.260375	0.232825	0.24407	8.05122e-18
STX16-NPEPL1	5.29087e-17	-0.994847	0.199596	0.224883	0.216144	0.240406	8.08693e-18
NES	5.35345e-17	3.09299	0.483486	0.0760473	0.515794	0.0335529	8.18769e-18
PKNOX1	5.45677e-17	-0.574045	0.402853	0.36622	0.518845	0.430692	8.35092e-18
PSMD7-DT	5.54058e-17	-2.60456	0.151445	0.396883	0.184539	0.648457	8.48447e-18
CENPN	5.67795e-17	2.58395	0.109595	0.0138982	0.0885384	0.00823862	8.70568e-18
TPD52	5.67795e-17	-1.15412	0.324218	0.380747	0.393113	0.498381	8.70518e-18
PCED1B	6.00488e-17	-2.32067	0.280276	0.60245	0.420695	1.20981	9.21268e-18
KLHL18	6.32768e-17	0.587884	0.325907	0.149229	0.360454	0.1307	9.71397e-18
PSD2	6.4538e-17	-1.57633	0.18502	0.267677	0.178635	0.28336	9.91374e-18
RIMS1	6.54722e-17	-0.967818	0.582666	0.613561	1.32231	1.38996	1.00635e-17
PEX2	6.6644e-17	-0.776988	0.202092	0.186251	0.190719	0.181644	1.025e-17
ZC2HC1A	6.98451e-17	-0.557298	0.509809	0.450159	0.731574	0.587957	1.0749e-17
PZP	7.45108e-17	-2.4234	0.0352633	0.115347	0.030225	0.089621	1.14742e-17
LGI1	7.61165e-17	-3.63417	0.024896	0.134977	0.0248934	0.181671	1.17287e-17
ESCO2	7.74107e-17	3.41794	0.130115	0.0102077	0.179615	0.00927313	1.19355e-17
PDCD11	8.04124e-17	0.97227	0.500012	0.187075	0.634761	0.171889	1.2406e-17
GPAM	8.40208e-17	-1.62616	0.240661	0.336147	0.237381	0.409377	1.29707e-17
ARNT2-DT	8.48103e-17	-1.49953	0.250862	0.369243	0.303901	0.494442	1.31007e-17
GTPBP10	8.55355e-17	-0.412522	0.404447	0.325979	0.518875	0.381458	1.32209e-17
PRKAA2	8.62446e-17	-0.703773	0.305267	0.28397	0.380261	0.335291	1.33387e-17
BCKDHB	9.467e-17	-1.04447	0.544406	0.608771	0.941313	1.10819	1.46509e-17
FNIP1	9.63241e-17	0.77856	0.60069	0.289035	0.849679	0.272165	1.49161e-17
CCDC137	9.64603e-17	0.967252	0.196861	0.0578697	0.168493	0.0466924	1.49464e-17
TRMT9B	9.83428e-17	-2.58176	0.112377	0.337246	0.116927	0.400103	1.52475e-17
YTHDF2	9.88777e-17	1.14604	0.324575	0.107966	0.294004	0.0714082	1.53398e-17
NAMPT	9.90554e-17	0.887446	0.799929	0.40976	1.89127	0.569973	1.53769e-17
KIF3A	1.02376e-16	-0.624016	0.707716	0.649444	1.22097	1.04074	1.59021e-17
MBP	1.04191e-16	-1.48989	0.544145	0.710573	0.871342	1.35603	1.61939e-17
MYO5A	1.05553e-16	0.531512	0.943788	0.746143	3.96101	1.50603	1.64157e-17
SEMA4B	1.14941e-16	-1.52773	0.180121	0.263633	0.159166	0.264598	1.78978e-17
MIB2	1.14941e-16	0.88593	0.163167	0.0628165	0.128406	0.0384715	1.78921e-17
TKT	1.19778e-16	2.13825	0.690239	0.190413	1.01481	0.124793	1.86624e-17
ERMARD	1.2177e-16	-0.854157	0.259612	0.271564	0.274908	0.280549	1.89845e-17
SOAT1	1.2263e-16	0.828828	0.241707	0.0985434	0.22791	0.0710275	1.91302e-17
SLC24A2	1.23028e-16	-1.71369	0.80321	0.941816	3.17949	5.61341	1.9204e-17
TNK2	1.24844e-16	-1.23857	0.403686	0.518629	0.481857	0.644629	1.94994e-17
EPDR1	1.32859e-16	0.651618	0.479895	0.218876	0.609397	0.212369	2.0764e-17
PON2	1.46181e-16	-0.891966	0.602307	0.582663	0.721453	0.710577	2.28601e-17
RNF32-DT	1.47316e-16	-0.805062	0.202901	0.180755	0.215827	0.207098	2.30516e-17
KCNB1	1.52141e-16	-1.27878	0.484627	0.586353	0.711061	0.952003	2.38211e-17
ENO4	1.55411e-16	0.789001	0.569373	0.264889	0.83802	0.263441	2.43479e-17
FOSL1	1.55721e-16	3.28679	0.278017	0.0220643	0.281699	0.0144004	2.44113e-17
RAB3IP	1.58595e-16	-1.89422	0.841636	0.950493	2.87558	6.05585	2.4877e-17
LINC00937	1.6389e-16	-1.12843	0.254453	0.29885	0.290029	0.351168	2.57233e-17
DUSP4	1.65526e-16	-1.11038	0.0996552	0.105178	0.0788752	0.091766	2.59959e-17
GATD1-DT	1.66764e-16	-0.984701	0.199144	0.208669	0.189689	0.212531	2.62063e-17
PKN2-AS1	1.67348e-16	-1.67141	0.175722	0.277571	0.21747	0.381477	2.6314e-17
CCDC175	1.70799e-16	-1.48763	0.0842944	0.126143	0.0894856	0.135615	2.68729e-17
ZDHHC16	1.754e-16	0.605746	0.293544	0.121511	0.26416	0.0944676	2.76135e-17
GPR176	1.78143e-16	-0.529757	0.265486	0.236151	0.332866	0.267465	2.80625e-17
CUL2	1.80528e-16	0.518007	0.636428	0.34023	0.980472	0.378326	2.84555e-17
ZNF280D	1.8067e-16	-0.753093	0.489098	0.483216	0.694958	0.660571	2.84951e-17
GTF2E2	1.93663e-16	0.547533	0.452764	0.219622	0.598886	0.225784	3.05627e-17
DESI1	2.12672e-16	1.41978	0.275068	0.081583	0.235157	0.0476755	3.3583e-17
SEMA5B	2.1298e-16	-1.79552	0.102176	0.206313	0.104377	0.205372	3.3652e-17
ITPK1	2.15967e-16	-1.36467	0.410938	0.501865	0.477231	0.666943	3.41446e-17
ZNF267	2.17712e-16	0.44431	0.274878	0.127989	0.273163	0.110009	3.44413e-17
COL9A2	2.18475e-16	-2.42456	0.0388301	0.113227	0.0236164	0.0745288	3.45829e-17
SDAD1	2.35407e-16	0.670104	0.394959	0.165286	0.453096	0.155702	3.72855e-17
AASS	2.52194e-16	-1.51343	0.342433	0.484237	0.413879	0.686734	3.99684e-17
TLE1	2.62157e-16	1.65215	0.754179	0.319775	2.03701	0.368099	4.15724e-17
TRAPPC10	2.78196e-16	0.454565	0.547188	0.30203	0.802604	0.323382	4.41425e-17
BTN3A1	2.80928e-16	-1.00149	0.130353	0.141102	0.108514	0.120557	4.46029e-17
BMPR1B	2.8272e-16	-2.00166	0.186018	0.343803	0.257125	0.548893	4.49143e-17
PPIB	2.92649e-16	2.79684	0.751231	0.261199	2.22832	0.174664	4.65197e-17
STK33	2.94194e-16	-1.13458	0.593485	0.670409	1.19327	1.46362	4.67933e-17
ABCA5	2.95697e-16	-1.11645	0.205873	0.241726	0.215452	0.254384	4.70607e-17
STIP1	2.95816e-16	1.94748	0.491523	0.105061	0.478418	0.0667677	4.71079e-17
GPR135	3.02562e-16	-0.61683	0.300701	0.26697	0.380135	0.319886	4.8211e-17
TCFL5	3.08308e-16	-0.712469	0.169469	0.155392	0.146715	0.132567	4.91561e-17
SDK1	3.53698e-16	-1.20363	0.226965	0.32641	0.37237	0.477369	5.64268e-17
CYB5R4	3.85896e-16	-0.456333	0.491689	0.432335	0.729472	0.561761	6.16003e-17
CCNYL1	3.91378e-16	0.45713	0.225966	0.107927	0.23568	0.0948059	6.25127e-17
PLEKHH2	4.49424e-16	-1.25227	0.477304	0.59024	0.743918	0.974572	7.18272e-17
NSD3	4.77692e-16	-0.507449	0.838093	0.788936	2.11071	1.67726	7.63905e-17
ARHGAP26	4.80949e-16	-1.38477	0.615955	0.720977	1.38362	2.0162	7.69573e-17
ID4	4.89057e-16	-0.692054	0.614552	0.435672	0.829432	0.719643	7.83014e-17
MCHR1	5.11292e-16	6.77499	0.142932	0.00106003	0.084205	0.000419878	8.19102e-17
ZNF529-AS1	5.1302e-16	-0.656723	0.162145	0.133681	0.152597	0.130859	8.2236e-17
RASSF2	5.27298e-16	-0.545791	0.479277	0.411684	0.502563	0.404874	8.45752e-17
RABIF	5.41734e-16	1.62897	0.116657	0.0271289	0.0984387	0.0176485	8.69424e-17
AP003059.1	5.45011e-16	-1.69649	0.112567	0.210985	0.12247	0.233048	8.75204e-17
SYT16	5.55512e-16	-1.34205	0.261467	0.346158	0.347417	0.465459	8.92597e-17
HOMER2	5.72903e-16	0.373631	0.369231	0.197519	0.449227	0.19127	9.21089e-17
SLC43A2	5.73566e-16	1.38261	0.419712	0.135762	0.407591	0.0850238	9.22703e-17
G6PD	5.77102e-16	4.21257	0.131637	0.00796985	0.0730976	0.00234569	9.28943e-17
SASH1	6.27102e-16	-1.2421	0.670741	0.774332	1.30136	1.76806	1.01003e-16
PLPPR1	6.50571e-16	-1.6099	0.0843895	0.135016	0.0952985	0.169926	1.04845e-16
UBR2	6.73615e-16	-0.493216	0.767994	0.714224	1.6637	1.30697	1.08623e-16
LRRC4	6.74033e-16	0.804759	0.156628	0.0585372	0.142515	0.044158	1.08755e-16
KCTD5	6.76776e-16	1.35558	0.131827	0.0339995	0.0845373	0.018234	1.09262e-16
COQ10A	7.05452e-16	-1.16622	0.110879	0.130933	0.0864168	0.106092	1.13959e-16
MAPRE3	7.46777e-16	0.896707	0.4433	0.168819	0.506383	0.145521	1.20706e-16
LINC01135	7.62874e-16	-2.38123	0.0477708	0.127125	0.0489897	0.143567	1.2338e-16
PRIMPOL	7.97316e-16	-0.940703	0.191178	0.211967	0.200324	0.216825	1.29027e-16
RPS6KL1	8.10898e-16	0.493608	0.432957	0.233128	0.567017	0.223466	1.31302e-16
ABCB9	8.32395e-16	1.0861	0.196291	0.0644262	0.195623	0.0507779	1.34863e-16
MTCP1	8.40276e-16	0.6606	0.230698	0.107338	0.240184	0.0838108	1.3622e-16
KIF2A	8.6278e-16	0.490937	0.846273	0.58706	2.09245	0.825325	1.3995e-16
GAN	9.09048e-16	-0.370691	0.452598	0.371128	0.616018	0.439908	1.47542e-16
TPX2	9.20738e-16	2.54158	0.306551	0.0558675	0.552018	0.0523699	1.49528e-16
AC079950.1	9.43706e-16	-1.88059	0.193437	0.360331	0.242855	0.511006	1.53348e-16
SLC8B1	9.81679e-16	-1.24956	0.116728	0.141691	0.101384	0.131987	1.59612e-16
CCNK	9.84842e-16	0.853582	0.609202	0.283656	0.925098	0.282721	1.6022e-16
SEMA7A	1.00157e-15	1.35439	0.213197	0.0514703	0.150712	0.0310256	1.63037e-16
VXN	1.01379e-15	-1.53706	0.25362	0.352754	0.243972	0.392036	1.65123e-16
E4F1	1.05388e-15	1.08553	0.184806	0.0631699	0.174323	0.0450976	1.71753e-16
DLGAP1-AS5	1.05777e-15	1.24572	0.189775	0.0581053	0.190348	0.0446383	1.72488e-16
POLI	1.11533e-15	-0.646275	0.278397	0.249303	0.293122	0.255818	1.81981e-16
PIP5K1A	1.12173e-15	0.673734	0.487814	0.245495	0.662827	0.22499	1.83133e-16
LPXN	1.15858e-15	-0.756702	0.219712	0.215618	0.237641	0.224269	1.8926e-16
ZBTB20	1.16117e-15	-1.18263	0.986589	0.995799	11.3695	14.6928	1.89793e-16
ASMTL	1.19721e-15	0.870375	0.294495	0.11146	0.247421	0.0726721	1.95799e-16
KHDRBS1	1.25119e-15	0.675779	0.652408	0.336343	0.99833	0.347499	2.04747e-16
FLOT1	1.26016e-15	0.912873	0.505433	0.216599	0.50027	0.147059	2.06335e-16
SNAPC4	1.26295e-15	0.667164	0.192819	0.0827215	0.180586	0.0630122	2.06912e-16
TBC1D32	1.26931e-15	-0.760661	0.471739	0.469436	0.746432	0.716332	2.08076e-16
MSANTD4	1.26997e-15	-0.379835	0.438997	0.353736	0.544883	0.391018	2.08305e-16
NBPF14	1.28117e-15	-1.47196	0.0743075	0.117231	0.0674797	0.104063	2.10265e-16
LINC02831	1.29083e-15	4.40464	0.187326	0.010404	0.437945	0.0125037	2.11974e-16
PGAM5	1.29362e-15	1.9781	0.101843	0.0182953	0.0640494	0.00912039	2.12555e-16
E2F6	1.33936e-15	0.748357	0.18395	0.0648188	0.174124	0.056832	2.20199e-16
EIF2D	1.35735e-15	-0.493756	0.144002	0.119548	0.122377	0.0952371	2.23286e-16
TMEM97	1.40212e-15	2.29908	0.152562	0.0212398	0.108667	0.0124732	2.30784e-16
PLEKHH1	1.40442e-15	-0.930254	0.481441	0.522398	0.723009	0.756387	2.31297e-16
ZNF552	1.41522e-15	0.793139	0.107502	0.0442857	0.100139	0.0314476	2.33212e-16
IGBP1	1.44325e-15	0.719376	0.421424	0.187233	0.493378	0.16475	2.37969e-16
SLC44A3	1.46183e-15	-2.08179	0.0714303	0.14546	0.0667377	0.155976	2.41171e-16
YWHAZ	1.46581e-15	1.4095	0.859945	0.410113	1.94763	0.401369	2.41968e-16
AC055733.2	1.49527e-15	0.954547	0.128165	0.0418908	0.126789	0.0362664	2.46974e-16
FBLIM1	1.56989e-15	1.59616	0.21227	0.0479369	0.193871	0.0345589	2.59448e-16
PATL1	1.64339e-15	0.612843	0.261752	0.117035	0.277192	0.0999134	2.71753e-16
CDK7	1.64529e-15	0.516198	0.36155	0.168191	0.406474	0.155711	2.72224e-16
PTPA	1.65746e-15	0.767778	0.238854	0.0994464	0.193306	0.0620932	2.74396e-16
TPM3	1.68994e-15	1.45614	0.538295	0.173923	0.622838	0.123655	2.79935e-16
TDG	1.75517e-15	0.683	0.549732	0.256645	0.81139	0.273046	2.90907e-16
WDFY1	1.87254e-15	0.913508	0.391321	0.156767	0.494029	0.142518	3.10539e-16
SLC50A1	1.87697e-15	1.67239	0.102865	0.0203369	0.0729629	0.0130947	3.11454e-16
SYCP2	1.91969e-15	-1.37024	0.207847	0.297515	0.225382	0.326261	3.18725e-16
TRMT10B	1.97048e-15	-0.485327	0.346522	0.296651	0.398164	0.308705	3.27347e-16
MELK	1.97797e-15	2.99488	0.165022	0.0183738	0.251317	0.0178728	3.2878e-16
CUX2	1.98713e-15	-2.0087	0.0880514	0.186487	0.0978742	0.224015	3.30493e-16
AC091551.1	2.12563e-15	-0.785304	0.165759	0.169487	0.171397	0.166185	3.5373e-16
PAICSP1	2.13329e-15	0.469519	0.556533	0.32747	0.841102	0.336232	3.55209e-16
ARHGAP29	2.40121e-15	-2.24643	0.0798478	0.121432	0.105213	0.25891	4.00049e-16
DIXDC1	2.48734e-15	-0.932084	0.539151	0.552118	0.951112	1.03253	4.14636e-16
RNF34	2.49134e-15	0.554295	0.502033	0.252522	0.671456	0.249657	4.15541e-16
EIF3A	2.52833e-15	0.944654	0.81548	0.447686	1.63975	0.469535	4.21952e-16
PER1	2.60571e-15	-2.8196	0.036262	0.125358	0.0219647	0.0902293	4.35114e-16
BEND7	2.6067e-15	-1.04206	0.397147	0.446626	0.564662	0.625208	4.35528e-16
C12orf40	2.63385e-15	0.909973	0.265367	0.101017	0.297533	0.0851739	4.40316e-16
AL138787.2	2.63769e-15	1.03915	0.151064	0.0488006	0.151893	0.0408718	4.4121e-16
GRIA4	2.64416e-15	-1.41348	0.730638	0.88269	2.2215	3.37037	4.42545e-16
MRE11	2.66955e-15	-0.820342	0.226656	0.233206	0.244205	0.244353	4.4705e-16
HPS4	2.76252e-15	-0.836232	0.288432	0.288956	0.299297	0.297364	4.62883e-16
ZNF213-AS1	2.77096e-15	-0.611327	0.195411	0.173256	0.190728	0.158052	4.64563e-16
MYH9	2.83795e-15	1.40927	0.579051	0.218013	0.723255	0.151439	4.76064e-16
RIT2	3.03754e-15	-2.29719	0.207871	0.448314	0.280603	0.804798	5.09836e-16
FAM181B	3.06887e-15	-1.1843	0.23688	0.274862	0.185896	0.233947	5.15387e-16
TIMM44	3.08331e-15	0.762513	0.352633	0.135095	0.344743	0.110158	5.18107e-16
NPAS1	3.17138e-15	2.29347	0.101867	0.0126811	0.087	0.00964244	5.33209e-16
PIWIL4-AS1	3.29616e-15	-1.90634	0.103246	0.19159	0.105106	0.224211	5.54504e-16
EVA1C	3.31229e-15	-2.09137	0.267721	0.509324	0.341389	0.80854	5.57532e-16
PACSIN2	3.43553e-15	-0.843148	0.711045	0.68258	1.30357	1.30018	5.78605e-16
LINC02240	3.50144e-15	-1.35522	0.07124	0.113345	0.0781514	0.114997	5.9004e-16
TGFBR1	3.50584e-15	0.621112	0.376245	0.180558	0.419067	0.153013	5.91116e-16
WAPL	3.54338e-15	0.35718	0.766021	0.515802	1.61621	0.691513	5.97785e-16
ZFP36L2	3.7119e-15	-1.50525	0.21391	0.292411	0.192914	0.287917	6.26569e-16
MEF2C	3.93041e-15	-1.38296	0.247367	0.362687	0.303704	0.452631	6.63829e-16
ITGB3BP	3.98445e-15	-0.507526	0.317037	0.278827	0.396772	0.315298	6.73336e-16
COL5A3	4.07692e-15	-2.23553	0.0895018	0.226925	0.0811076	0.202375	6.89353e-16
SPATA1	4.1023e-15	-0.953223	0.14959	0.163951	0.141096	0.150242	6.94036e-16
MIR137HG	4.11329e-15	-1.28362	0.579051	0.681559	1.18025	1.56408	6.96288e-16
ERLIN1	4.1167e-15	0.51137	0.378338	0.169526	0.402414	0.153369	6.9726e-16
RAP2A	4.17165e-15	1.07676	0.520628	0.205763	0.731326	0.191369	7.06965e-16
ELP1	4.33872e-15	-0.451432	0.384687	0.316595	0.460445	0.34698	7.35692e-16
CAPN15	4.42898e-15	1.45893	0.163381	0.0479369	0.152606	0.0302409	7.5142e-16
RAPH1	4.44267e-15	0.531568	0.634407	0.382317	1.12913	0.429115	7.54167e-16
ACSL4	4.52504e-15	0.344654	0.628677	0.379608	1.04319	0.453421	7.68583e-16
SMARCAD1	4.64541e-15	-0.28402	0.540388	0.419104	0.786695	0.528861	7.89472e-16
ZNF337-AS1	4.79191e-15	-0.81109	0.332921	0.340152	0.40928	0.401578	8.14826e-16
GNB5	4.84995e-15	-0.593089	0.327357	0.294099	0.381006	0.316863	8.25159e-16
SEPTIN7-DT	4.85339e-15	-1.53231	0.166235	0.257509	0.178492	0.298952	8.26207e-16
EIF3J-DT	4.92355e-15	-0.79637	0.167162	0.162616	0.162424	0.156643	8.38622e-16
NAA16	5.1329e-15	-0.43853	0.475924	0.404107	0.665917	0.500313	8.7477e-16
NCOA4	5.22288e-15	0.93348	0.500297	0.217306	0.560857	0.160929	8.90604e-16
PPARA	5.30582e-15	-0.521587	0.339199	0.296887	0.410927	0.319841	9.05253e-16
FAM66D	5.34284e-15	-1.08629	0.227726	0.275725	0.254735	0.303018	9.12246e-16
HS3ST1	5.34284e-15	-1.3106	0.140768	0.177771	0.127929	0.172998	9.12591e-16
YWHAG	5.35409e-15	1.4891	0.723814	0.269522	1.09486	0.211435	9.15024e-16
F8	5.44345e-15	-1.48546	0.131922	0.19905	0.133398	0.214212	9.30815e-16
COPG1	5.54664e-15	1.00908	0.369635	0.138746	0.334816	0.091493	9.48991e-16
AC024901.1	5.65419e-15	1.17691	0.112971	0.0343135	0.145063	0.0349089	9.67931e-16
ZFR	6.05901e-15	0.351927	0.903721	0.683562	2.67708	1.15091	1.03781e-15
HYCC1	6.29014e-15	0.797862	0.442801	0.198775	0.652943	0.210299	1.078e-15
ZFP90	6.45536e-15	-0.31125	0.438141	0.339013	0.548377	0.370887	1.10693e-15
NRF1	6.52425e-15	-0.84653	0.699108	0.724785	1.4736	1.43861	1.11937e-15
BCL2	7.02424e-15	-1.80596	0.529759	0.742295	1.02618	2.06512	1.20582e-15
EEPD1	7.32764e-15	-0.918837	0.240138	0.200503	0.332898	0.343465	1.25861e-15
FSTL1	7.48699e-15	-1.23991	0.159196	0.199953	0.143726	0.182354	1.28669e-15
RALB	7.48881e-15	0.970819	0.193199	0.0628951	0.174822	0.0493548	1.28772e-15
DYRK3	7.62324e-15	1.51945	0.149447	0.029563	0.132059	0.0250376	1.31156e-15
GNL1	7.70298e-15	0.937889	0.318369	0.116525	0.269774	0.0762035	1.32602e-15
AATF	7.90112e-15	0.416335	0.322482	0.157709	0.344885	0.141489	1.36088e-15
ZNF623	8.22155e-15	0.803221	0.168422	0.0627773	0.150107	0.0476163	1.41686e-15
ZBTB7A	8.24959e-15	0.702483	0.188396	0.0711397	0.163903	0.055398	1.42248e-15
TTYH2	8.26152e-15	-2.00411	0.0523838	0.106592	0.0397502	0.0874034	1.42533e-15
CSNK1A1	8.66073e-15	0.391223	0.966187	0.813317	4.23568	1.7948	1.49503e-15
DUSP6	8.68665e-15	1.0807	0.31756	0.101292	0.306201	0.0793876	1.50033e-15
WASF1	8.76132e-15	0.450491	0.478278	0.256409	0.678047	0.270595	1.51406e-15
ATG10	9.03669e-15	-0.885672	0.591202	0.610302	1.04811	1.09718	1.56251e-15
DLGAP1-AS4	9.31457e-15	1.08291	0.205112	0.0773821	0.229689	0.0602085	1.61145e-15
TAPT1-AS1	9.58463e-15	-2.09474	0.248746	0.508264	0.318603	0.794157	1.65909e-15
SIRT7	9.63353e-15	1.12975	0.16564	0.0528052	0.139224	0.034235	1.66847e-15
THBS4	9.79225e-15	-0.993061	0.283486	0.302305	0.331915	0.368953	1.6969e-15
ESF1	9.87536e-15	0.573496	0.594697	0.304621	0.936256	0.343314	1.71293e-15
N6AMT1	9.87536e-15	-1.15849	0.131756	0.150799	0.117675	0.141996	1.71319e-15
PLEKHF2	9.9446e-15	-0.961534	0.134134	0.13961	0.109008	0.116652	1.72615e-15
BZW2	9.95942e-15	0.636853	0.313875	0.133407	0.343041	0.120833	1.72967e-15
PLA2R1	1.05474e-14	-1.50193	0.133658	0.175651	0.157214	0.23207	1.83279e-15
IDNK	1.08778e-14	-0.803704	0.142266	0.142515	0.143251	0.134031	1.89125e-15
CDH6	1.09246e-14	2.46054	0.543812	0.113659	1.14139	0.10884	1.90043e-15
LINC02082	1.10125e-14	-1.15803	0.136369	0.165404	0.149538	0.178792	1.91677e-15
FASTKD1	1.12041e-14	0.481875	0.286102	0.139374	0.325705	0.128759	1.9512e-15
PDP1	1.15665e-14	1.86634	0.427155	0.108673	0.539269	0.0827623	2.0154e-15
THOC1	1.17873e-14	-0.245301	0.542647	0.40815	0.779156	0.506477	2.055e-15
VPS53	1.20988e-14	0.429256	0.641041	0.381139	1.10764	0.450231	2.11047e-15
MALRD1	1.21457e-14	-1.22709	0.434788	0.546072	0.704095	0.947661	2.12092e-15
SPACA6	1.21457e-14	1.24743	0.129117	0.0474265	0.106101	0.0247097	2.12096e-15
ARPP21	1.22743e-14	-1.40573	0.596623	0.770994	1.28169	1.95854	2.1446e-15
PRKAR2A	1.25016e-14	0.633878	0.578457	0.29512	0.899482	0.320951	2.18551e-15
HDGF	1.25574e-14	1.62508	0.191487	0.0430686	0.142401	0.0246124	2.19646e-15
PIGU	1.26662e-14	-0.732583	0.368874	0.305171	0.35753	0.323975	2.21671e-15
MAK16	1.2718e-14	1.18529	0.19572	0.057752	0.179002	0.0429029	2.22699e-15
DNAJC5	1.29597e-14	0.551371	0.45645	0.222881	0.529879	0.196864	2.27056e-15
ABI2	1.31462e-14	0.381052	0.765284	0.510227	1.56187	0.65281	2.30448e-15
STAMBP	1.32153e-14	0.404337	0.388895	0.209179	0.46542	0.193575	2.31785e-15
EXOC3	1.33685e-14	0.528169	0.3747	0.191316	0.40745	0.15287	2.346e-15
XIAP	1.34049e-14	0.386919	0.631435	0.385536	0.973387	0.408759	2.35366e-15
FLRT2	1.38707e-14	-0.682716	0.701177	0.685878	1.88293	1.67103	2.43677e-15
DDX54	1.38911e-14	1.48918	0.198169	0.0552	0.144367	0.0282802	2.4417e-15
SEMA3C	1.41186e-14	2.46036	0.416122	0.0687448	0.854052	0.0888544	2.48302e-15
FKBP11	1.45973e-14	1.14996	0.137724	0.0350595	0.108587	0.0263904	2.5686e-15
KLHL15	1.47093e-14	1.04076	0.184306	0.0588905	0.185914	0.0489275	2.58973e-15
ANO8	1.51917e-14	-1.62245	0.108453	0.170704	0.0669268	0.117217	2.67611e-15
LINC00237	1.58769e-14	-0.88084	0.177601	0.173452	0.152507	0.156724	2.79833e-15
GRIN2A	1.60672e-14	-2.15849	0.243015	0.408386	0.369739	0.908286	2.83511e-15
L3MBTL4	1.60672e-14	-2.14215	0.101914	0.244513	0.101306	0.2545	2.83647e-15
MED15	1.60672e-14	0.52282	0.561574	0.305171	0.799313	0.306396	2.83385e-15
RPS6KA6	1.65345e-14	-0.515407	0.221995	0.179027	0.263868	0.204565	2.92054e-15
CIC	1.70485e-14	1.52637	0.113019	0.0318009	0.0773574	0.0146556	3.01297e-15
INPP5A	1.71151e-14	-0.525155	0.349946	0.310353	0.429141	0.346396	3.02636e-15
GNG7	1.77396e-14	-1.49253	0.28137	0.398375	0.317368	0.504859	3.14018e-15
BMS1	1.77396e-14	0.442309	0.682559	0.403243	1.14007	0.462631	3.13857e-15
SLBP	1.78372e-14	1.71641	0.224278	0.0489576	0.168284	0.0275995	3.15917e-15
TCF20	1.79903e-14	0.901286	0.541363	0.249735	0.842048	0.250533	3.18801e-15
ANKIB1	1.82307e-14	0.374873	0.92945	0.752856	3.70516	1.56851	3.23234e-15
CD81-AS1	1.86658e-14	-1.63864	0.0829152	0.130227	0.0799563	0.13062	3.31128e-15
TSTD2	1.89188e-14	-0.434098	0.46715	0.392957	0.637548	0.478784	3.35797e-15
MTX3	1.89706e-14	-0.539722	0.253335	0.206038	0.255681	0.204655	3.36898e-15
DPYSL3	1.93121e-14	-1.11114	0.837047	0.864199	2.40118	2.89239	3.43145e-15
RECQL	1.93541e-14	0.894412	0.564879	0.237996	0.75973	0.225404	3.44077e-15
WARS2	1.95186e-14	-1.0039	0.148044	0.164069	0.161159	0.177282	3.47188e-15
HCFC1	2.0032e-14	1.6869	0.172179	0.0462879	0.113459	0.0193529	3.56512e-15
SLITRK2	2.1088e-14	0.737966	0.726549	0.425739	1.10264	0.361802	3.75507e-15
PITPNB	2.12831e-14	0.493484	0.661206	0.377763	1.12832	0.43751	3.79185e-15
PARP4	2.16224e-14	-0.452089	0.348353	0.294531	0.403259	0.308563	3.85436e-15
TRAFD1	2.17773e-14	0.831156	0.316895	0.120843	0.299619	0.0925797	3.88404e-15
LINC01588	2.25062e-14	1.91498	0.104791	0.0202191	0.106976	0.0161651	4.0162e-15
CANX	2.25657e-14	2.65701	0.92322	0.47132	6.57156	0.568472	4.02897e-15
CCDC7	2.26532e-14	-1.11885	0.580644	0.673786	1.10905	1.38702	4.04676e-15
ACTN4	2.39683e-14	0.782501	0.559862	0.274508	0.702244	0.22572	4.28397e-15
WDR27	2.39797e-14	-0.855237	0.464796	0.48832	0.69006	0.701746	4.28831e-15
GTF2F1	2.4153e-14	1.85311	0.396837	0.0973656	0.408353	0.0616536	4.32161e-15
TMEM116	2.45277e-14	-0.705372	0.200071	0.194103	0.216358	0.195164	4.391e-15
TOLLIP	2.48038e-14	0.87875	0.332469	0.123513	0.301368	0.089508	4.4428e-15
C21orf62-AS1	2.54385e-14	-0.879083	0.254548	0.246476	0.237396	0.237233	4.55891e-15
CHD6	2.57208e-14	-0.800574	0.791606	0.802049	1.83353	1.81151	4.61196e-15
ARL8B	2.60626e-14	0.735182	0.651932	0.327627	0.95992	0.319485	4.67574e-15
IP6K2	2.6676e-14	0.345957	0.590822	0.342546	0.789014	0.340837	4.78833e-15
DOCK9	2.79437e-14	-1.30937	0.369136	0.485572	0.520792	0.700734	5.01855e-15
GORASP2	2.85201e-14	1.01501	0.329426	0.119783	0.339538	0.0936639	5.1248e-15
BLTP2	2.93899e-14	0.952889	0.291357	0.109419	0.2773	0.0784609	5.2839e-15
CTNND2	3.00054e-14	-1.38615	0.990061	0.995603	12.777	18.9047	5.39741e-15
AC022872.1	3.01759e-14	-0.501338	0.195197	0.172117	0.202427	0.157233	5.43097e-15
SLC25A21-AS1	3.05123e-14	-1.52387	0.0717632	0.101606	0.0621656	0.0934934	5.49442e-15
FDXR	3.10663e-14	3.82381	0.116562	0.00643869	0.0623507	0.00224145	5.59715e-15
BICDL1	3.18228e-14	0.907691	0.381928	0.155	0.575057	0.16427	5.7365e-15
DET1	3.29707e-14	-0.557679	0.202211	0.172196	0.209099	0.17179	5.94658e-15
TDP1	3.45159e-14	0.637654	0.364784	0.171018	0.459685	0.164896	6.22856e-15
L1CAM	3.48997e-14	3.95681	0.155059	0.00812689	0.0967332	0.00344204	6.30115e-15
IGSF11	3.50598e-14	-1.13964	0.458947	0.519532	0.737781	0.906037	6.33341e-15
SLC25A18	3.53259e-14	-1.43849	0.183331	0.256841	0.185631	0.280941	6.38484e-15
EAF1	3.54776e-14	0.635999	0.272738	0.103569	0.252183	0.0882729	6.41565e-15
VPS51	3.56772e-14	-0.572484	0.224563	0.192376	0.208824	0.170637	6.45515e-15
SWT1	3.58851e-14	-0.623705	0.186042	0.167131	0.204703	0.177377	6.4962e-15
ANKDD1A	3.6297e-14	-1.25107	0.303032	0.362844	0.333583	0.428259	6.57424e-15
CKAP4	3.72241e-14	2.03947	0.402544	0.0889247	0.35042	0.0475367	6.74571e-15
TLE3	3.72713e-14	-1.09809	0.237831	0.268737	0.200129	0.236778	6.75782e-15
KIF20B	3.72953e-14	1.09222	0.309904	0.133053	0.523692	0.136795	6.76575e-15
CTNS	3.78578e-14	0.962968	0.106836	0.036944	0.0908932	0.0259949	6.8714e-15
CDH20	3.91992e-14	-2.90139	0.551492	0.928546	1.5338	6.54368	7.11862e-15
IL17D	3.94958e-14	-1.33516	0.112638	0.139728	0.0850479	0.112385	7.17624e-15
PDIA4	4.00189e-14	3.35163	0.523481	0.0708649	0.582795	0.0311054	7.27511e-15
ALDH18A1	4.07863e-14	0.491603	0.478302	0.234738	0.56621	0.223095	7.41852e-15
CNN3-DT	4.0975e-14	-2.00164	0.0965402	0.186526	0.0898599	0.203791	7.45677e-15
MICAL2	4.13099e-14	2.25952	0.141101	0.0175101	0.147993	0.0168681	7.52166e-15
CCDC144A	4.20164e-14	-0.832436	0.252122	0.254014	0.276666	0.276236	7.6543e-15
CSNK2A1	4.32125e-14	0.507773	0.722601	0.424522	1.29329	0.49926	7.87634e-15
TNPO1	4.35018e-14	0.533636	0.899941	0.675513	2.84026	1.08239	7.93322e-15
SCAF1	4.53063e-14	1.28827	0.132303	0.0376114	0.0965194	0.0223673	8.26663e-15
KTN1	4.56125e-14	1.17223	0.978932	0.773075	6.00918	1.46664	8.32686e-15
BUB1	4.77535e-14	2.50327	0.109547	0.0147226	0.143716	0.0140008	8.72228e-15
PRPF40A	4.79598e-14	0.385814	0.564903	0.315339	0.799287	0.336465	8.76453e-15
NRDE2	4.81846e-14	-0.720284	0.440661	0.412076	0.548188	0.501506	8.81021e-15
RIT1	4.83512e-14	1.02344	0.211105	0.0652899	0.163051	0.0430162	8.84529e-15
PPARGC1A	4.85157e-14	-1.36777	0.134847	0.177692	0.15128	0.206646	8.88002e-15
FBXO4	4.86143e-14	-1.41806	0.206468	0.27922	0.204242	0.301502	8.90271e-15
CCDC80	4.97309e-14	-1.63279	0.074997	0.122453	0.0474823	0.0820732	9.11195e-15
KIAA0825	5.07088e-14	-1.27767	0.560052	0.663774	1.08689	1.48192	9.29596e-15
DNA2	5.1144e-14	1.38837	0.143193	0.0445605	0.182382	0.0396607	9.38064e-15
ZNF438	5.14317e-14	-1.31819	0.541101	0.676259	0.921941	1.31677	9.43831e-15
TUSC3	5.23873e-14	0.361135	0.813221	0.540026	1.79841	0.761612	9.61868e-15
DOCK4	5.31184e-14	-1.4133	0.843158	0.946135	3.05841	4.6538	9.758e-15
PGD	5.31411e-14	1.31627	0.260754	0.0678811	0.20993	0.0463525	9.77231e-15
SLC35E4	5.31411e-14	1.68957	0.329093	0.080837	0.354111	0.0581084	9.77048e-15
TNFSF13B	5.58691e-14	-0.988925	0.170634	0.194299	0.171437	0.192828	1.02793e-14
RMND1	5.62014e-14	0.448429	0.447057	0.236701	0.611282	0.248682	1.03458e-14
RRM1	5.62704e-14	0.734939	0.30705	0.124023	0.310833	0.101914	1.03639e-14
GRID2	5.79689e-14	-2.51186	0.337606	0.709002	0.780999	2.37232	1.06823e-14
ERCC6	5.90393e-14	-0.474594	0.415908	0.353775	0.535362	0.410744	1.08852e-14
SEC31A	5.94805e-14	0.890879	0.806967	0.456166	1.87727	0.565115	1.09722e-14
ATRN	6.02384e-14	0.406942	0.783165	0.528876	1.69565	0.711424	1.11177e-14
XNDC1N	6.05351e-14	-1.60909	0.116895	0.19744	0.121298	0.214796	1.11783e-14
ZNF774	6.11024e-14	-0.766526	0.100915	0.0971301	0.0996997	0.0923358	1.12889e-14
KDELR1	6.16982e-14	2.98846	0.558626	0.101174	0.725569	0.0482617	1.14048e-14
AC097347.1	6.49014e-14	-1.06389	0.0979669	0.11464	0.103238	0.120918	1.20032e-14
ACTR8	6.5519e-14	0.6534	0.299037	0.12261	0.308187	0.105567	1.21236e-14
CIAPIN1	6.61745e-14	0.843582	0.248223	0.0836638	0.191229	0.0572123	1.22513e-14
PDIA3	6.85978e-14	2.42457	0.836833	0.38907	3.60553	0.366089	1.27064e-14
ATP1A2	7.07016e-14	-3.13982	0.068458	0.285737	0.044494	0.220369	1.31029e-14
GATAD2B	7.26341e-14	0.429028	0.656212	0.410977	1.18936	0.491558	1.3468e-14
CEP68	7.27488e-14	-0.457699	0.22656	0.178124	0.223472	0.169251	1.34962e-14
JAM2	7.35383e-14	-0.654946	0.358863	0.303875	0.369133	0.315708	1.36497e-14
SBF2-AS1	7.40464e-14	-0.959938	0.133207	0.137529	0.125258	0.133825	1.37511e-14
TRMO	7.74234e-14	-0.663004	0.143598	0.127792	0.131505	0.114223	1.43856e-14
WDR45	7.9335e-14	-1.28604	0.170848	0.166542	0.124299	0.16884	1.47484e-14
LASP1	7.94365e-14	1.43551	0.207181	0.0590475	0.16801	0.0340367	1.47748e-14
MATCAP2	8.01158e-14	-0.643941	0.162597	0.143889	0.166057	0.141344	1.49088e-14
DUSP5	8.06798e-14	2.22884	0.217525	0.0274822	0.177508	0.0197575	1.50215e-14
SLC25A28	8.06969e-14	-0.53595	0.372227	0.322092	0.428926	0.338373	1.50324e-14
SLC37A1	8.32035e-14	-0.668612	0.137011	0.11837	0.126949	0.109572	1.55073e-14
ACOT7	8.36579e-14	1.1418	0.401736	0.124966	0.428941	0.106256	1.55999e-14
ST8SIA5	8.38591e-14	2.76677	0.554583	0.109615	1.26036	0.0920724	1.56455e-14
ALDH7A1	8.56991e-14	-1.04111	0.427773	0.458953	0.50821	0.589832	1.59969e-14
MARK2	8.67924e-14	0.54011	0.459541	0.238899	0.586089	0.226295	1.62093e-14
ZNF37A	8.8363e-14	-0.533596	0.39679	0.34659	0.510378	0.408675	1.65195e-14
FAM66B	8.8363e-14	-1.09527	0.171109	0.205096	0.177018	0.210152	1.65188e-14
NPTN	8.90548e-14	0.974503	0.823707	0.431707	1.61412	0.444398	1.66574e-14
MAP3K4-AS1	8.97176e-14	3.85877	0.191487	0.0100114	0.158852	0.00535687	1.67899e-14
CTNNA2	9.16553e-14	-1.34245	0.950113	0.984178	7.82868	11.1797	1.71613e-14
RNF121	9.1908e-14	0.562062	0.426632	0.198068	0.511134	0.187132	1.72174e-14
SLCO1C1	9.22101e-14	-4.10414	0.0401141	0.324722	0.0397096	0.424787	1.72828e-14
OLA1	9.68062e-14	0.616569	0.641137	0.336186	1.13564	0.410006	1.81535e-14
HEXD	9.79216e-14	-0.876402	0.117988	0.123434	0.110379	0.113749	1.8372e-14
YLPM1	9.89779e-14	-0.591953	0.707074	0.663932	1.35021	1.12796	1.85796e-14
PTPN23	1.00244e-13	0.753586	0.190441	0.0830356	0.174518	0.0573246	1.8827e-14
MAEA	1.0188e-13	0.678055	0.235026	0.0955204	0.184969	0.0637261	1.91439e-14
COL9A1	1.03244e-13	-3.50954	0.128641	0.527227	0.134203	0.88689	1.94101e-14
RHPN2	1.06135e-13	-0.617129	0.213934	0.18633	0.211918	0.178206	1.99637e-14
PTPN5	1.0929e-13	0.941249	0.23367	0.0974442	0.265902	0.0749547	2.05676e-14
ASCL1	1.10337e-13	-2.04908	0.0836048	0.17938	0.0540367	0.122079	2.07752e-14
NFAT5	1.10829e-13	0.606381	0.942908	0.75105	4.50314	1.61822	2.08784e-14
PA2G4	1.12694e-13	2.09803	0.60799	0.136665	0.759514	0.0964335	2.12405e-14
MEG3	1.15148e-13	0.797326	0.952538	0.813121	10.4311	3.37067	2.1714e-14
SIN3B	1.15304e-13	-0.532909	0.403591	0.334459	0.464069	0.364898	2.17544e-14
TIMM23	1.15896e-13	0.3834	0.426608	0.226297	0.505088	0.213272	2.18772e-14
TAFA2	1.17023e-13	-1.5291	0.3815	0.514153	0.685881	1.10481	2.21011e-14
SUPT3H	1.17182e-13	-0.632902	0.803067	0.790507	2.32886	2.0135	2.21424e-14
TEX22	1.23963e-13	-0.792285	0.125003	0.123434	0.122219	0.1195	2.34355e-14
HYDIN	1.24235e-13	-1.54582	0.152205	0.243375	0.159967	0.259867	2.34988e-14
ATP2A2	1.28107e-13	0.698657	0.857068	0.568176	1.87404	0.631107	2.42433e-14
TJP1	1.32331e-13	-0.669835	0.940554	0.921283	3.62692	3.26234	2.50553e-14
PBX1	1.34014e-13	-1.00898	0.610676	0.682266	1.22895	1.41362	2.53868e-14
GLIPR1L2	1.34274e-13	-2.5011	0.0581144	0.168191	0.0549271	0.173194	2.54489e-14
PHACTR3	1.39495e-13	-1.45951	0.525764	0.67571	0.932182	1.46115	2.64518e-14
TYMS	1.41211e-13	2.85207	0.164903	0.0190805	0.113723	0.00782652	2.67907e-14
PMM2	1.42869e-13	0.527899	0.698466	0.427584	1.44856	0.548232	2.71188e-14
PPIL3	1.42884e-13	-0.441186	0.144596	0.10934	0.130901	0.0975256	2.71354e-14
OSBPL3	1.47303e-13	-0.909836	0.459232	0.517569	0.802251	0.825423	2.79886e-14
BACH1	1.47741e-13	1.02549	0.866936	0.583055	3.6232	0.975956	2.8086e-14
ATL3	1.478e-13	0.509972	0.400737	0.188096	0.416303	0.161105	2.81113e-14
CTPS2	1.61157e-13	-1.10022	0.296849	0.35295	0.346381	0.415953	3.06673e-14
AC009554.1	1.61193e-13	0.584649	0.334609	0.172196	0.384074	0.139652	3.06895e-14
DNTTIP2	1.62271e-13	1.48755	0.310736	0.0816222	0.315524	0.0603097	3.09103e-14
LTBP3	1.67867e-13	-1.48379	0.131922	0.188214	0.0842169	0.131026	3.19922e-14
TTLL9	1.70003e-13	-1.30686	0.120485	0.162145	0.118559	0.158637	3.24156e-14
TUB	1.71816e-13	-0.837859	0.380193	0.364571	0.446335	0.428087	3.27777e-14
FEM1C	1.74665e-13	-0.516753	0.477589	0.365985	0.617024	0.479424	3.33378e-14
PLCE1	1.74975e-13	-1.54135	0.820426	0.926897	2.63759	4.37871	3.34137e-14
[truncated: 8,469 more rows]
