# Supplementary material
Source: Research Square preprint supplement (doi:10.21203/rs.3.rs-9118779/v1)
Supplement: Supplementary file 2 [file 5a15cf59ab7a2bcf57bffa09.xlsx]

## Sheet: degdata (11)
Genes included in the V2.2 Solid Tumor Panel (GRCh38):	ABL1, ACVR1, AKT1, AKT2, AKT3, ALK, APC, AR, ARAF, ARID1A, ARID1B, ARID2, ASXL1, ATM, ATR, ATRX, AURKA, AURKB, AXIN1, AXL, B2M, BAP1, BARD1, BCL2, BCL6, BCOR, BCORL1, BLM, BRAF, BRCA1, BRCA2, BRD4, BRIP1, CARD11, CBFB, CBL, CCND1, CCND2, CCND3, CCNE1, CD274, CD79B, CDC73, CDH1, CDK12, CDK4, CDK6, CDK8, CDKN1B, CDKN2A, CDKN2B, CDKN2C, CHEK1, CHEK2, CIC, CREBBP, CRKL, CRLF2, CSF1R, CTCF, CTNNB1, DA…
Genes included in the V3 Fusion Panel (GRCh37):	ABL1, ABL2, AKT3, ALK, ARHGAP26, AXL, BCL2, BCL6, BCR, BRAF, BRD3, BRD4, CAMTA1, CBFA2T3, CBFB, CCNB3, CCND1, CIC, CREBBP, CRFL2, CSF1R, DNAJB1, DUSP22, EGFR, EPC1, EPOR, ERG, ESR1, ESRRA, ETV1, ETV4, ETV5, ETV6, EWSR1, FGFR1, FGFR2, FGFR3, FGR, FOXO1, FUS, GLI1, GLIS2, HMGA2, IL2RB, IL3, IL3RA, INSR, JAK2, JAZF1, KAT6A, KMT2A, MALT1, MAML2, MAST1, MAST2, MEAF6, MECOM, MET, MRTFA, MRTFB, MSMB, MU…
